# Supplementary material for: Flux Balance Analysis of Cyanobacterial Metabolism: The Metabolic Network of Synechocystis sp. PCC 6803
Source: PubMed Central journal article supplement (PMC3699288; doi:10.1371/journal.pcbi.1003081), 2013-06-27

# The Metabolic Network of *Synechocystis* sp. PCC 6803

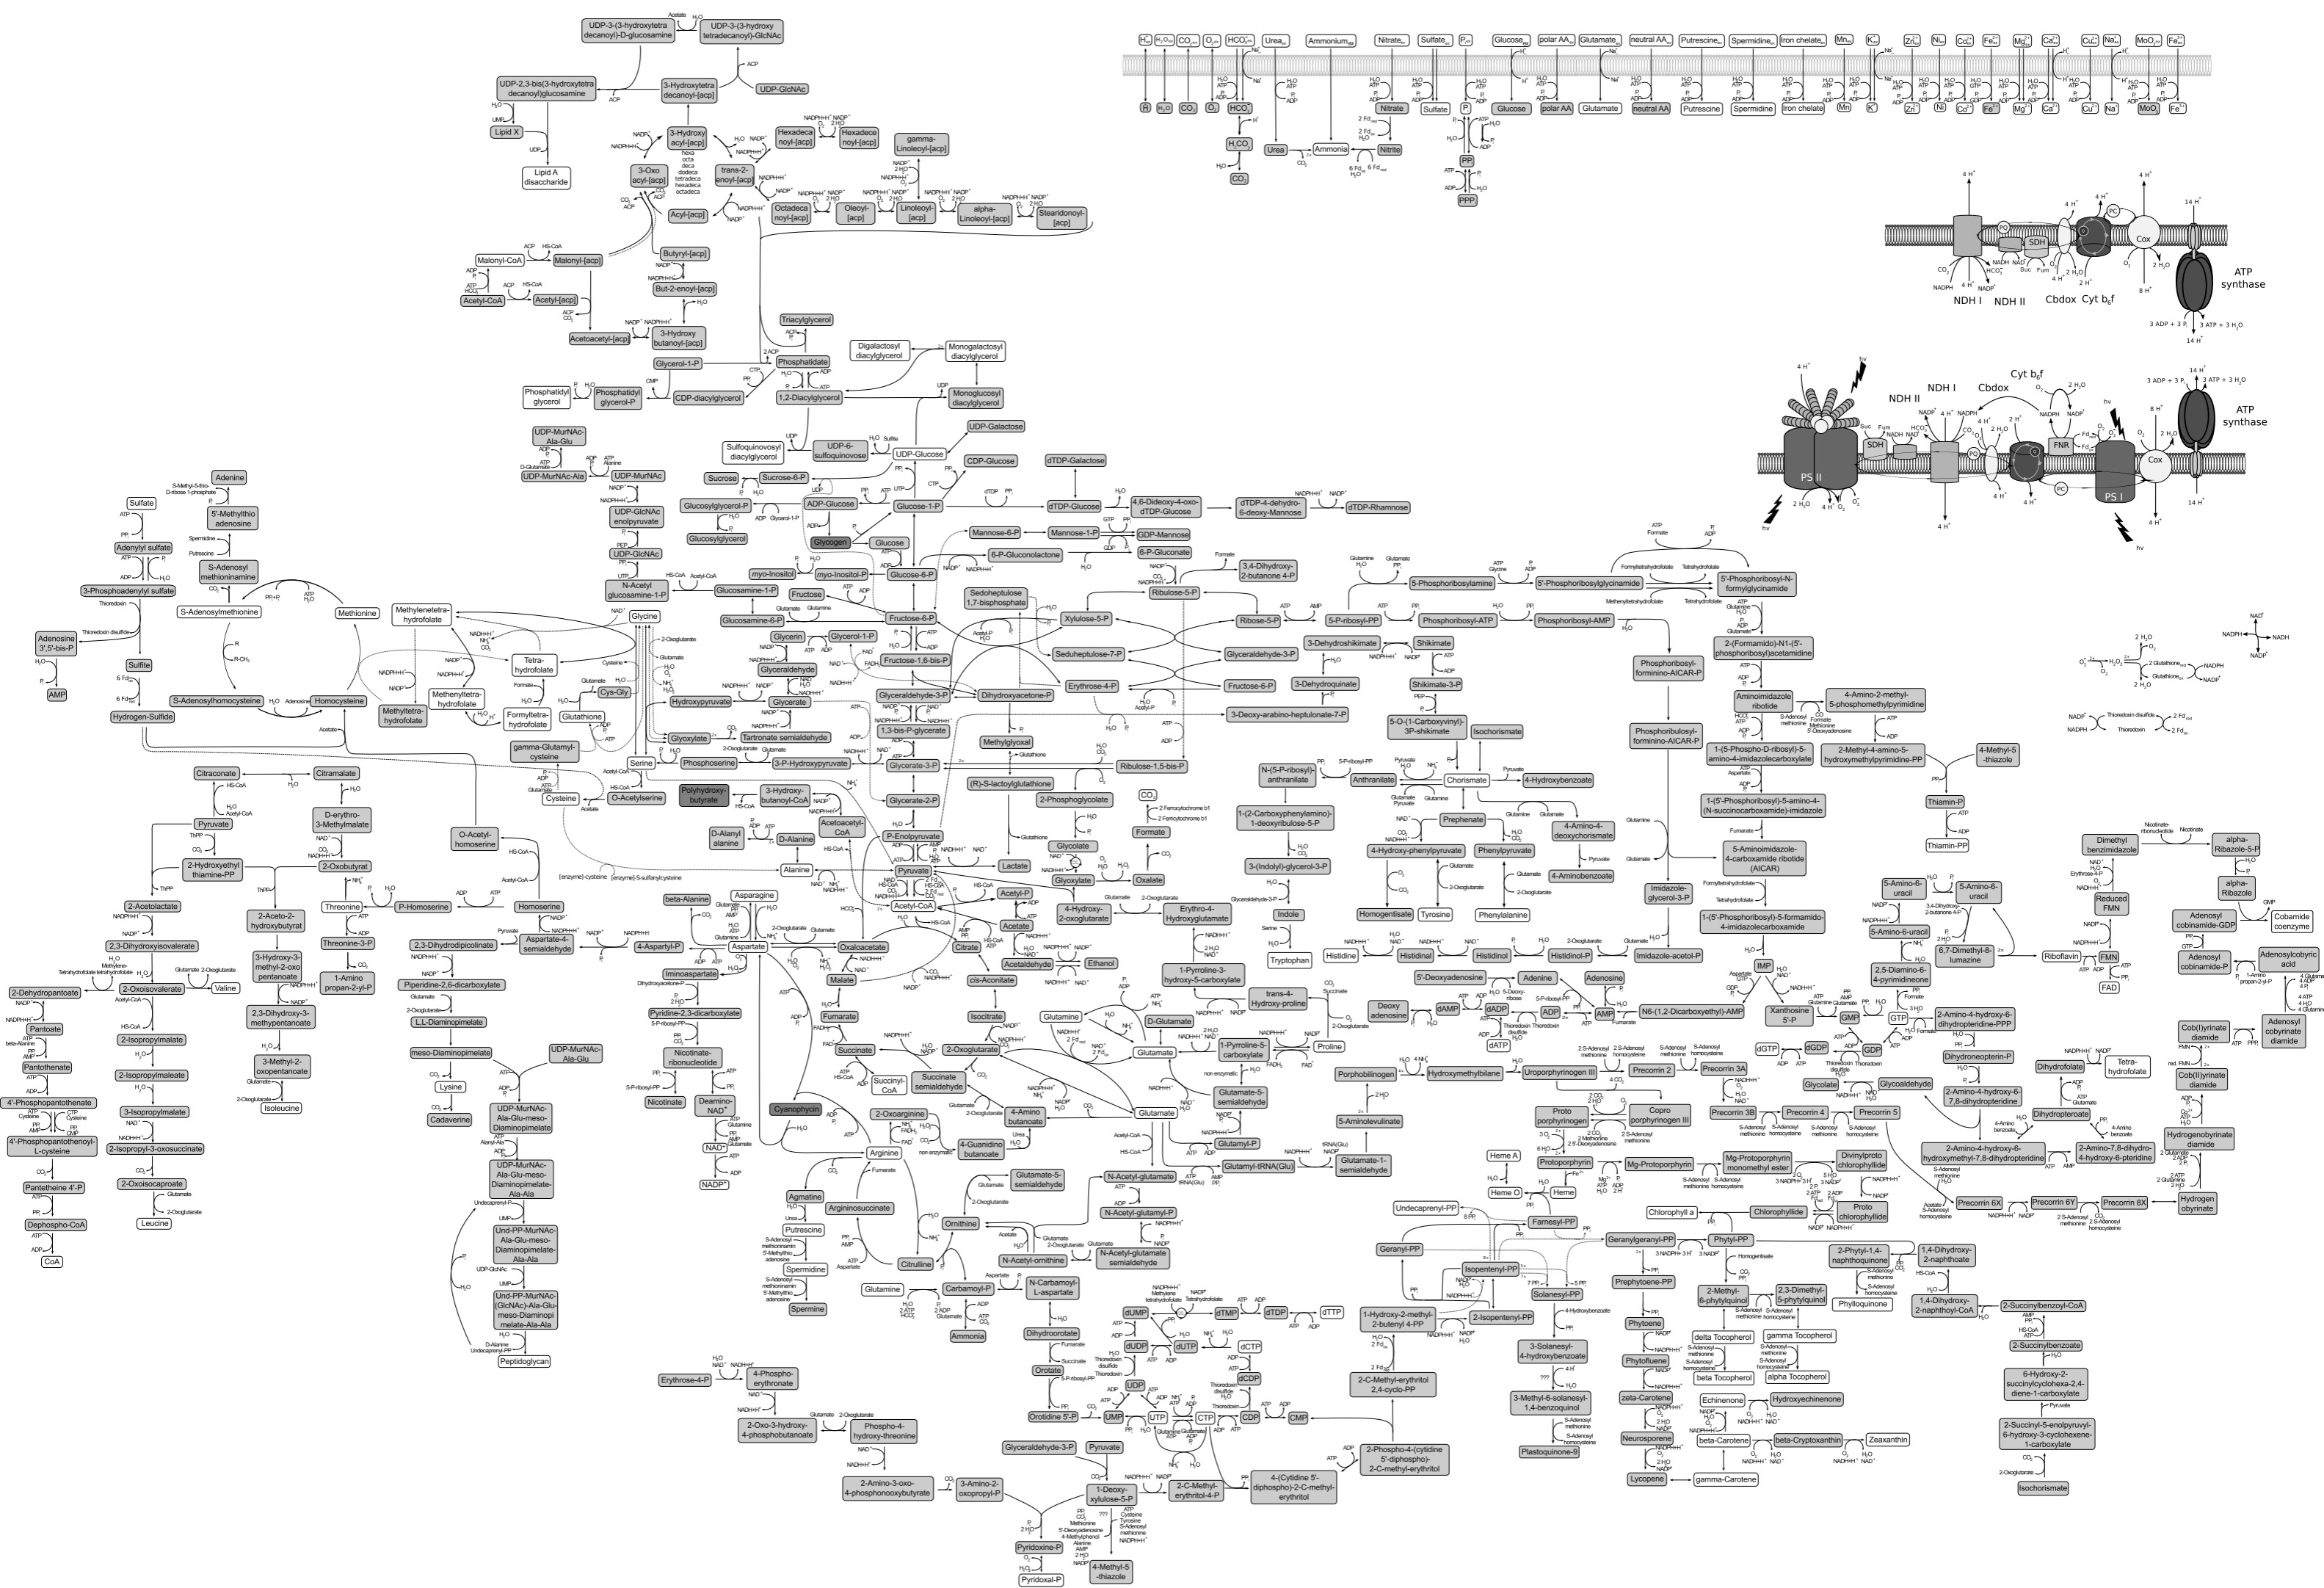

Supplement: pcbi.1003081.s003.pdf [file pcbi.1003081.s003.pdf]
