# Supplementary material for: Flux Balance Analysis of Cyanobacterial Metabolism: The Metabolic Network of Synechocystis sp. PCC 6803
Source: PubMed Central journal article supplement (PMC3699288; doi:10.1371/journal.pcbi.1003081), 2013-06-27
Supplement: pcbi.1003081.s013.pdf [file pcbi.1003081.s013.pdf]

## An overview of previous reconstructions of *Synechocystis* sp. PCC 6803

| Publication                    | Year | GRR | #Genes | #Reactions | #Metabolites | GS | Comments                                                                                                                         |
|--------------------------------|------|-----|--------|------------|--------------|----|----------------------------------------------------------------------------------------------------------------------------------|
| <b>Shastri and Morgan [10]</b> | 2005 | n   | --     | 93         | 46           | y  | The first reconstruction. Forward and reverse reactions are treated separately. The TCA cycle is closed by the glyoxylate shunt. |
| <b>Hong and Lee [11]</b>       | 2007 | y   | 78     | 56         | 54           | y  | An extension of the model of Shastri and Morgan, including gene-reaction relationship                                            |
| <b>Fu [12]</b>                 | 2009 | y   | 633    | 831        | 704          | y  | The first genome-scale reconstruction. Only little manual curation.                                                              |
| <b>Knoop et al. [13]</b>       | 2010 | y   | 337    | 380        | 291          | n  | Contains a more detailed representation of photorespiration, the TCA cycle is closed by the GABA shunt.                          |
| <b>Montagud et al. [14]</b>    | 2010 | y   | 669    | 882        | 790          | y  | Based on BioCyc software.                                                                                                        |
| <b>Montagud et al. [15]</b>    | 2011 | y   | 811    | 956        | 911          | y  | An extension of the earlier model. The reconstruction is not provided as supplemental information of the article.                |
| <b>Yoshikawa et al. [16]</b>   | 2011 | y   | 376    | 493        | 465          | y  | The study also compares the reconstruction of Knoop et al. and Montagud et al.                                                   |
| <b>Nogales et al. [17]</b>     | 2012 | y   | 678    | 863        | 795          | n  | Makes use of a refined biomass objective function. The TCA cycle is closed by the GABA shunt.                                    |
| <b>Saha et al. [18]</b>        | 2012 | y   | 731    | 1156       | 996          | n  | Contains the TCA bypass identified by Zhang and Bryant.                                                                          |
| <b>This study</b>              | 2013 | y   | 677    | 759/1035   | 601          | n  | Contains the TCA bypass identified by Zhang and Bryant.                                                                          |

GPR: Gene-reaction relationships

GS: Glyoxylate shunt

Reaction and metabolite numbers are taken from the respective network description. Metabolite numbers also contain external metabolites that are not balanced.
