# Supplementary material for: Flux Balance Analysis of Cyanobacterial Metabolism: The Metabolic Network of Synechocystis sp. PCC 6803
Source: PLoS Comput Biol. 2013 Jun 27;9(6):e1003081. doi: 10.1371/journal.pcbi.1003081 (PMC3699288; doi:10.1371/journal.pcbi.1003081)
Supplement: Table S1 — An excel sheet containing the metabolic network of Synechocystis sp. PCC 6803. (XLS) [file pcbi.1003081.s007.xls]

## Sheet: reactions
rID	genes	ec	reaction	kegg	reaction_form	Pathway	evid/relia	comment
R1	sll0402	2.6.1.1	L-Phenylalanine_[cyt] + 2-Oxoglutarate_[cyt] <=> Phenylpyruvate_[cyt] + L-Glutamate_[cyt]	R00694	C00079_[cyt] + C00026_[cyt] <=> C00166_[cyt] + C00025_[cyt]	Aromatic Amino Acids	A
R2	sll1958	2.6.1.9	L-Phenylalanine_[cyt] + 2-Oxoglutarate_[cyt] <=> Phenylpyruvate_[cyt] + L-Glutamate_[cyt]	R00694	C00079_[cyt] + C00026_[cyt] <=> C00166_[cyt] + C00025_[cyt]	Aromatic Amino Acids	A
R3	sll0402	2.6.1.1	L-Tyrosine_[cyt] + 2-Oxoglutarate_[cyt] <=> 3-(4-Hydroxyphenyl)pyruvate_[cyt] + L-Glutamate_[cyt]	R00734	C00082_[cyt] + C00026_[cyt] <=> C01179_[cyt] + C00025_[cyt]	Aromatic Amino Acids	A
R4	sll0934	2.5.1.54	Phosphoenolpyruvate_[cyt] + D-Erythrose 4-phosphate_[cyt] + H2O_[cyt] => 2-Dehydro-3-deoxy-D-arabino-heptonate 7-phosphate_[cyt] + Orthophosphate_[cyt]	R01826	C00074_[cyt] + C00279_[cyt] + C00001_[cyt] => C04691_[cyt] + C00009_[cyt]	Aromatic Amino Acids	A
R5	slr2130	4.2.3.4	2-Dehydro-3-deoxy-D-arabino-heptonate 7-phosphate_[cyt] => 3-Dehydroquinate_[cyt] + Orthophosphate_[cyt]	R03083	C04691_[cyt] => C00944_[cyt] + C00009_[cyt]	Aromatic Amino Acids	A
R6	sll1112	4.2.1.10	3-Dehydroquinate_[cyt] <=> 3-Dehydroshikimate_[cyt] + H2O_[cyt]	R03084	C00944_[cyt] <=> C02637_[cyt] + C00001_[cyt]	Aromatic Amino Acids	A
R7	slr1559	1.1.1.25	Shikimate_[cyt] + NADP+_[cyt] <=> 3-Dehydroshikimate_[cyt] + NADPH_[cyt] + H+_[cyt]	R02413	C00493_[cyt] + C00006_[cyt] <=> C02637_[cyt] + C00005_[cyt] + C00080_[cyt]	Aromatic Amino Acids	A
R8	sll1669	2.7.1.71	ATP_[cyt] + Shikimate_[cyt] => ADP_[cyt] + Shikimate 3-phosphate_[cyt]	R02412	C00002_[cyt] + C00493_[cyt] => C00008_[cyt] + C03175_[cyt]	Aromatic Amino Acids	A
R9	slr0444	2.5.1.19	Phosphoenolpyruvate_[cyt] + Shikimate 3-phosphate_[cyt] <=> Orthophosphate_[cyt] + 5-O-(1-Carboxyvinyl)-3-phosphoshikimate_[cyt]	R03460	C00074_[cyt] + C03175_[cyt] <=> C00009_[cyt] + C01269_[cyt]	Aromatic Amino Acids	A
R10	sll1747	4.2.3.5	5-O-(1-Carboxyvinyl)-3-phosphoshikimate_[cyt] => Chorismate_[cyt] + Orthophosphate_[cyt]	R01714	C01269_[cyt] => C00251_[cyt] + C00009_[cyt]	Aromatic Amino Acids	A
R11	slr0055, slr0738	4.1.3.27	Chorismate_[cyt] + L-Glutamine_[cyt] => Anthranilate_[cyt] + Pyruvate_[cyt] + L-Glutamate_[cyt]	R00986	C00251_[cyt] + C00064_[cyt] => C00108_[cyt] + C00022_[cyt] + C00025_[cyt]	Aromatic Amino Acids	A
R12	slr0055, slr0738	4.1.3.27	Chorismate_[cyt] + NH3_[cyt] => Anthranilate_[cyt] + Pyruvate_[cyt] + H2O_[cyt]	R00985	C00251_[cyt] + C00014_[cyt] => C00108_[cyt] + C00022_[cyt] + C00001_[cyt]	Aromatic Amino Acids	A
R13	slr1867	2.4.2.18	N-(5-Phospho-D-ribosyl)anthranilate_[cyt] + Diphosphate_[cyt] <= Anthranilate_[cyt] + 5-Phospho-alpha-D-ribose 1-diphosphate_[cyt]	R01073	C04302_[cyt] + C00013_[cyt] <= C00108_[cyt] + C00119_[cyt]	Aromatic Amino Acids	A
R14	sll0356	5.3.1.24	N-(5-Phospho-D-ribosyl)anthranilate_[cyt] => 1-(2-Carboxyphenylamino)-1'-deoxy-D-ribulose 5'-phosphate_[cyt]	R03509	C04302_[cyt] => C01302_[cyt]	Aromatic Amino Acids	A
R15	slr0546	4.1.1.48	1-(2-Carboxyphenylamino)-1'-deoxy-D-ribulose 5'-phosphate_[cyt] => Indoleglycerol phosphate_[cyt] + CO2_[cyt] + H2O_[cyt]	R03508	C01302_[cyt] => C03506_[cyt] + C00011_[cyt] + C00001_[cyt]	Aromatic Amino Acids	A
R16	slr0543, slr0966	4.2.1.20	Indoleglycerol phosphate_[cyt] => Indole_[cyt] + D-Glyceraldehyde 3-phosphate_[cyt]	R02340	C03506_[cyt] => C00463_[cyt] + C00118_[cyt]	Aromatic Amino Acids	A
R17	slr0543, slr0966	4.2.1.20	L-Serine_[cyt] + Indoleglycerol phosphate_[cyt] => L-Tryptophan_[cyt] + D-Glyceraldehyde 3-phosphate_[cyt] + H2O_[cyt]	R02722	C00065_[cyt] + C03506_[cyt] => C00078_[cyt] + C00118_[cyt] + C00001_[cyt]	Aromatic Amino Acids	A
R18	slr0543, slr0966	4.2.1.20	L-Serine_[cyt] + Indole_[cyt] <=> L-Tryptophan_[cyt] + H2O_[cyt]	R00674	C00065_[cyt] + C00463_[cyt] <=> C00078_[cyt] + C00001_[cyt]	Aromatic Amino Acids	A
R19	sll0109	5.4.99.5	Chorismate_[cyt] <=> Prephenate_[cyt]	R01715	C00251_[cyt] <=> C00254_[cyt]	Aromatic Amino Acids	A
R20	sll1662	4.2.1.51	Prephenate_[cyt] => Phenylpyruvate_[cyt] + H2O_[cyt] + CO2_[cyt]	R01373	C00254_[cyt] => C00166_[cyt] + C00001_[cyt] + C00011_[cyt]	Aromatic Amino Acids	A
R21	slr2081	1.3.1.12	Prephenate_[cyt] + NAD+_[cyt] => 3-(4-Hydroxyphenyl)pyruvate_[cyt] + CO2_[cyt] + NADH_[cyt] + H+_[cyt]	R01728	C00254_[cyt] + C00003_[cyt] => C01179_[cyt] + C00011_[cyt] + C00004_[cyt] + C00080_[cyt]	Aromatic Amino Acids	A
R22	sll0938	2.6.1.11	N-Acetylornithine_[cyt] + 2-Oxoglutarate_[cyt] <=> N-Acetyl-L-glutamate 5-semialdehyde_[cyt] + L-Glutamate_[cyt]	R02283	C00437_[cyt] + C00026_[cyt] <=> C01250_[cyt] + C00025_[cyt]	Arginine, Glutamate, Glutamine and Proline	A
R23	slr1022	2.6.1.11	N-Acetylornithine_[cyt] + 2-Oxoglutarate_[cyt] <=> N-Acetyl-L-glutamate 5-semialdehyde_[cyt] + L-Glutamate_[cyt]	R02283	C00437_[cyt] + C00026_[cyt] <=> C01250_[cyt] + C00025_[cyt]	Arginine, Glutamate, Glutamine and Proline	A
R24	sll1027, sll1502	1.4.1.14	2 L-Glutamate_[cyt] + NAD+_[cyt] <= L-Glutamine_[cyt] + 2-Oxoglutarate_[cyt] + NADH_[cyt] + H+_[cyt]	R00093	2 C00025_[cyt] + C00003_[cyt] <= C00064_[cyt] + C00026_[cyt] + C00004_[cyt] + C00080_[cyt]	Arginine, Glutamate, Glutamine and Proline	A
R25	slr0288	6.3.1.2	ATP_[cyt] + L-Glutamate_[cyt] + NH3_[cyt] => ADP_[cyt] + Orthophosphate_[cyt] + L-Glutamine_[cyt]	R00253	C00002_[cyt] + C00025_[cyt] + C00014_[cyt] => C00008_[cyt] + C00009_[cyt] + C00064_[cyt]	Arginine, Glutamate, Glutamine and Proline	A
R26	slr1756	6.3.1.2	ATP_[cyt] + L-Glutamate_[cyt] + NH3_[cyt] => ADP_[cyt] + Orthophosphate_[cyt] + L-Glutamine_[cyt]	R00253	C00002_[cyt] + C00025_[cyt] + C00014_[cyt] => C00008_[cyt] + C00009_[cyt] + C00064_[cyt]	Arginine, Glutamate, Glutamine and Proline	A
R27	slr2079	3.5.1.2	L-Glutamine_[cyt] + H2O_[cyt] <=> L-Glutamate_[cyt] + NH3_[cyt]	R00256	C00064_[cyt] + C00001_[cyt] <=> C00025_[cyt] + C00014_[cyt]	Arginine, Glutamate, Glutamine and Proline	A
R28	slr0710	1.4.1.4	L-Glutamate_[cyt] + NADP+_[cyt] + H2O_[cyt] <=> 2-Oxoglutarate_[cyt] + NH3_[cyt] + NADPH_[cyt] + H+_[cyt]	R00248	C00025_[cyt] + C00006_[cyt] + C00001_[cyt] <=> C00026_[cyt] + C00014_[cyt] + C00005_[cyt] + C00080_[cyt]	Arginine, Glutamate, Glutamine and Proline	A
R29	slr2035	2.7.2.11	ATP_[cyt] + L-Glutamate_[cyt] => ADP_[cyt] + L-Glutamyl 5-phosphate_[cyt]	R00239	C00002_[cyt] + C00025_[cyt] => C00008_[cyt] + C03287_[cyt]	Arginine, Glutamate, Glutamine and Proline	A
R30	sll0373	1.2.1.41	L-Glutamate 5-semialdehyde_[cyt] + Orthophosphate_[cyt] + NADP+_[cyt] <= L-Glutamyl 5-phosphate_[cyt] + NADPH_[cyt] + H+_[cyt]	R03313	C01165_[cyt] + C00009_[cyt] + C00006_[cyt] <= C03287_[cyt] + C00005_[cyt] + C00080_[cyt]	Arginine, Glutamate, Glutamine and Proline	A
R31	sll0461	1.2.1.41	L-Glutamate 5-semialdehyde_[cyt] + Orthophosphate_[cyt] + NADP+_[cyt] <= L-Glutamyl 5-phosphate_[cyt] + NADPH_[cyt] + H+_[cyt]	R03313	C01165_[cyt] + C00009_[cyt] + C00006_[cyt] <= C03287_[cyt] + C00005_[cyt] + C00080_[cyt]	Arginine, Glutamate, Glutamine and Proline	A
R32	sll1561	1.5.1.12	L-Glutamate 5-semialdehyde_[cyt] + NAD+_[cyt] + H2O_[cyt] => L-Glutamate_[cyt] + NADH_[cyt] + H+_[cyt]	R00245	C01165_[cyt] + C00003_[cyt] + C00001_[cyt] => C00025_[cyt] + C00004_[cyt] + C00080_[cyt]	Arginine, Glutamate, Glutamine and Proline	A
R33	sll1561	1.5.1.12	(S)-1-Pyrroline-5-carboxylate_[cyt] + NAD+_[cyt] + 2 H2O_[cyt] => L-Glutamate_[cyt] + NADH_[cyt] + H+_[cyt]	R00707	C03912_[cyt] + C00003_[cyt] + 2 C00001_[cyt] => C00025_[cyt] + C00004_[cyt] + C00080_[cyt]	Arginine, Glutamate, Glutamine and Proline	A
R34	sll1561	1.5.99.8	L-Proline_[cyt] + PQ_[tlm] => (S)-1-Pyrroline-5-carboxylate_[cyt] + PQH2_[tlm]	-	C00148_[cyt] + C10385_[tlm] => C03912_[cyt] + C16695_[tlm]	Arginine, Glutamate, Glutamine and Proline	A	Final electron acceptor is likely to be Q; Rasmusson et al. 2008
R35	sll1561	1.5.99.8	L-Proline_[cyt] + PQ_[cym] => (S)-1-Pyrroline-5-carboxylate_[cyt] + PQH2_[cym]	-	C00148_[cyt] + C10385_[cym] => C03912_[cyt] + C16695_[cym]	Arginine, Glutamate, Glutamine and Proline	A	Final electron acceptor is likely to be Q; Rasmusson et al. 2008
R36	slr0661	1.5.1.2	L-Proline_[cyt] + NADP+_[cyt] <= (S)-1-Pyrroline-5-carboxylate_[cyt] + NADPH_[cyt] + H+_[cyt]	R01251	C00148_[cyt] + C00006_[cyt] <= C03912_[cyt] + C00005_[cyt] + C00080_[cyt]	Arginine, Glutamate, Glutamine and Proline	A
R37	sll1883	2.3.1.1	Acetyl-CoA_[cyt] + L-Glutamate_[cyt] => CoA_[cyt] + N-Acetyl-L-glutamate_[cyt]	R00259	C00024_[cyt] + C00025_[cyt] => C00010_[cyt] + C00624_[cyt]	Arginine, Glutamate, Glutamine and Proline	A
R38	sll1883	2.3.1.35	N-Acetylornithine_[cyt] + L-Glutamate_[cyt] => L-Ornithine_[cyt] + N-Acetyl-L-glutamate_[cyt]	R02282	C00437_[cyt] + C00025_[cyt] => C00077_[cyt] + C00624_[cyt]	Arginine, Glutamate, Glutamine and Proline	A
R39	sll0100	3.5.1.14	N-Acetylornithine_[cyt] + H2O_[cyt] <=> Acetate_[cyt] + L-Ornithine_[cyt]	R00669	C00437_[cyt] + C00001_[cyt] <=> C00033_[cyt] + C00077_[cyt]	Arginine, Glutamate, Glutamine and Proline	A	N-acyl-L-amino acid amidohydrolase
R40	slr1653	3.5.1.14	N-Acetylornithine_[cyt] + H2O_[cyt] <=> Acetate_[cyt] + L-Ornithine_[cyt]	R00669	C00437_[cyt] + C00001_[cyt] <=> C00033_[cyt] + C00077_[cyt]	Arginine, Glutamate, Glutamine and Proline	A
R41	-	-	(S)-1-Pyrroline-5-carboxylate_[cyt] + H2O_[cyt] <=> L-Glutamate 5-semialdehyde_[cyt]	-	C03912_[cyt] + C00001_[cyt] <=> C01165_[cyt]	Arginine, Glutamate, Glutamine and Proline	A	spontaneous
R42	slr1898	2.7.2.8	ATP_[cyt] + N-Acetyl-L-glutamate_[cyt] => ADP_[cyt] + N-Acetyl-L-glutamate 5-phosphate_[cyt]	R02649	C00002_[cyt] + C00624_[cyt] => C00008_[cyt] + C04133_[cyt]	Arginine, Glutamate, Glutamine and Proline	A
R43	sll0080	1.2.1.38	N-Acetyl-L-glutamate 5-semialdehyde_[cyt] + Orthophosphate_[cyt] + NADP+_[cyt] <=> N-Acetyl-L-glutamate 5-phosphate_[cyt] + NADPH_[cyt] + H+_[cyt]	R03443	C01250_[cyt] + C00009_[cyt] + C00006_[cyt] <=> C04133_[cyt] + C00005_[cyt] + C00080_[cyt]	Arginine, Glutamate, Glutamine and Proline	A
R44	sll0902	2.1.3.3	Carbamoyl phosphate_[cyt] + L-Ornithine_[cyt] <=> Orthophosphate_[cyt] + L-Citrulline_[cyt]	R01398	C00169_[cyt] + C00077_[cyt] <=> C00009_[cyt] + C00327_[cyt]	Arginine, Glutamate, Glutamine and Proline	A
R45	slr1133	4.3.2.1	N-(L-Arginino)succinate_[cyt] => Fumarate_[cyt] + L-Arginine_[cyt]	R01086	C03406_[cyt] => C00122_[cyt] + C00062_[cyt]	Arginine, Glutamate, Glutamine and Proline	A
R46	slr0585	6.3.4.5	ATP_[cyt] + L-Citrulline_[cyt] + L-Aspartate_[cyt] => AMP_[cyt] + Diphosphate_[cyt] + N-(L-Arginino)succinate_[cyt]	R01954	C00002_[cyt] + C00327_[cyt] + C00049_[cyt] => C00020_[cyt] + C00013_[cyt] + C03406_[cyt]	Arginine, Glutamate, Glutamine and Proline	A
R47	sll0370, sll1498, slr1616	6.3.5.5	2 ATP_[cyt] + L-Glutamine_[cyt] + HCO3-_[cyt] + H2O_[cyt] + H+_[cyt] => 2 ADP_[cyt] + Orthophosphate_[cyt] + L-Glutamate_[cyt] + Carbamoyl phosphate_[cyt]	R00575	2 C00002_[cyt] + C00064_[cyt] + C00288_[cyt] + C00001_[cyt] + C00080_[cyt] => 2 C00008_[cyt] + C00009_[cyt] + C00025_[cyt] + C00169_[cyt]	Arginine, Glutamate, Glutamine and Proline	A
R48	sll0573	2.7.2.2	ATP_[cyt] + NH3_[cyt] + CO2_[cyt] <=> ADP_[cyt] + Carbamoyl phosphate_[cyt]	R00150	C00002_[cyt] + C00014_[cyt] + C00011_[cyt] <=> C00008_[cyt] + C00169_[cyt]	Arginine, Glutamate, Glutamine and Proline	A
R49	sll1454	1.7.7.2	Nitrite_[cyt] + H2O_[cyt] + 2 Oxidized ferredoxin_[cyt] <= Nitrate_[cyt] + 2 Reduced ferredoxin_[cyt] + 2 H+_[cyt]	R00791	C00088_[cyt] + C00001_[cyt] + 2 C00139_[cyt] <= C00244_[cyt] + 2 C00138_[cyt] + 2 C00080_[cyt]	Arginine, Glutamate, Glutamine and Proline	A
R50	slr0898	1.7.7.1	NH3_[cyt] + 2 H2O_[cyt] + 6 Oxidized ferredoxin_[cyt] <= Nitrite_[cyt] + 6 Reduced ferredoxin_[cyt] + 7 H+_[cyt]	R00790	C00014_[cyt] + 2 C00001_[cyt] + 6 C00139_[cyt] <= C00088_[cyt] + 6 C00138_[cyt] + 7 C00080_[cyt]	Arginine, Glutamate, Glutamine and Proline	A
R51	sll1499	1.4.7.1	2 L-Glutamate_[cyt] + 2 Oxidized ferredoxin_[cyt] <= L-Glutamine_[cyt] + 2-Oxoglutarate_[cyt] + 2 Reduced ferredoxin_[cyt] + 2 H+_[cyt]	R00021	2 C00025_[cyt] + 2 C00139_[cyt] <= C00064_[cyt] + C00026_[cyt] + 2 C00138_[cyt] + 2 C00080_[cyt]	Arginine, Glutamate, Glutamine and Proline	A
R52	sll1336	3.5.3.6	L-Arginine_[cyt] + H2O_[cyt] => L-Citrulline_[cyt] + NH3_[cyt]	R00552	C00062_[cyt] + C00001_[cyt] => C00327_[cyt] + C00014_[cyt]	Arginine, Glutamate, Glutamine and Proline	B	Schriek et al. 2007
R53	slr1022	2.6.1.13	L-Ornithine_[cyt] + 2-Oxoglutarate_[cyt] <=> L-Glutamate 5-semialdehyde_[cyt] + L-Glutamate_[cyt]	R00667	C00077_[cyt] + C00026_[cyt] <=> C01165_[cyt] + C00025_[cyt]	Arginine, Glutamate, Glutamine and Proline	B	Schriek et al. 2007
R54	slr0782	1.4.3.4	L-Arginine_[cyt] + PQ_[tlm] + H2O_[cyt] => 5-Guanidino-2-oxopentanoate_[cyt] + NH3_[cyt] + PQH2_[tlm]	-	C00062_[cyt] + C10385_[tlm] + C00001_[cyt] => C03771_[cyt] + C00014_[cyt] + C16695_[tlm]	Arginine, Glutamate, Glutamine and Proline	B	Arginine dehydrogenase, Schriek et al. 2009
R55	slr0782	1.4.3.4	L-Arginine_[cyt] + PQ_[cym] + H2O_[cyt] => 5-Guanidino-2-oxopentanoate_[cyt] + NH3_[cyt] + PQH2_[cym]	-	C00062_[cyt] + C10385_[cym] + C00001_[cyt] => C03771_[cyt] + C00014_[cyt] + C16695_[cym]	Arginine, Glutamate, Glutamine and Proline	B	Arginine dehydrogenase, Schriek et al. 2009
R56	-	-	5-Guanidino-2-oxopentanoate_[cyt] + H2O2_[cyt] => 4-Guanidinobutanoate_[cyt] + CO2_[cyt] + H2O_[cyt]	-	C03771_[cyt] + C00027_[cyt] => C01035_[cyt] + C00011_[cyt] + C00001_[cyt]	Arginine, Glutamate, Glutamine and Proline	B	spontaneous, Schriek et al. 2007
R57	sll1077 or sll0228	3.5.3.7	4-Guanidinobutanoate_[cyt] + H2O_[cyt] => 4-Aminobutanoate_[cyt] + Urea_[cyt]	R01990	C01035_[cyt] + C00001_[cyt] => C00334_[cyt] + C00086_[cyt]	Arginine, Glutamate, Glutamine and Proline	B	Schriek et al. 2007
R58	sll0420, sll1750, slr1256	3.5.1.5	Urea_[cyt] + H2O_[cyt] => CO2_[cyt] + 2 NH3_[cyt]	R00131	C00086_[cyt] + C00001_[cyt] => C00011_[cyt] + 2 C00014_[cyt]	Arginine, Glutamate, Glutamine and Proline	A
R59	sll0428 or sll0191	1.14.11.2	L-Proline_[cyt] + 2-Oxoglutarate_[cyt] + Oxygen_[cyt] => trans-4-Hydroxy-L-proline_[cyt] + Succinate_[cyt] + CO2_[cyt]	R01252	C00148_[cyt] + C00026_[cyt] + C00007_[cyt] => C01157_[cyt] + C00042_[cyt] + C00011_[cyt]	Arginine, Glutamate, Glutamine and Proline	C	BLAST search: sll0428 57 % identity, 257 score and E-value 8 e-70 and sll0191 48 % identity, 197 score and E-value 8 e-52 prolyl 4-hydroxylase from Trichodesmium erythraeum IMS101
R60	slr0661	1.5.1.2	trans-4-Hydroxy-L-proline_[cyt] + NADP+_[cyt] => L-1-Pyrroline-3-hydroxy-5-carboxylate_[cyt] + NADPH_[cyt] + H+_[cyt]	R03293	C01157_[cyt] + C00006_[cyt] => C04281_[cyt] + C00005_[cyt] + C00080_[cyt]	Arginine, Glutamate, Glutamine and Proline	A
R61	sll1561	1.5.1.12	L-1-Pyrroline-3-hydroxy-5-carboxylate_[cyt] + NAD+_[cyt] + 2 H2O_[cyt] => L-erythro-4-Hydroxyglutamate_[cyt] + NADH_[cyt] + H+_[cyt]	R04444	C04281_[cyt] + C00003_[cyt] + 2 C00001_[cyt] => C05947_[cyt] + C00004_[cyt] + C00080_[cyt]	Arginine, Glutamate, Glutamine and Proline	A
R62	sll0402	2.6.1.1	L-erythro-4-Hydroxyglutamate_[cyt] + 2-Oxoglutarate_[cyt] <=> D-4-Hydroxy-2-oxoglutarate_[cyt] + L-Glutamate_[cyt]	R05052	C05947_[cyt] + C00026_[cyt] <=> C05946_[cyt] + C00025_[cyt]	Arginine, Glutamate, Glutamine and Proline	A
R63	sll0107	4.1.3.16	D-4-Hydroxy-2-oxoglutarate_[cyt] => Pyruvate_[cyt] + Glyoxylate_[cyt]	R00471	C05946_[cyt] => C00022_[cyt] + C00048_[cyt]	Arginine, Glutamate, Glutamine and Proline	A
R64	slr0662, slr1312	4.1.1.19	L-Arginine_[cyt] => Agmatine_[cyt] + CO2_[cyt]	R00566	C00062_[cyt] => C00179_[cyt] + C00011_[cyt]	Arginine, Glutamate, Glutamine and Proline	A	Schriekt et al. 2007
R65	slr2072	4.3.1.19	L-Threonine_[cyt] => 2-Oxobutanoate_[cyt] + NH3_[cyt]	R00996	C00188_[cyt] => C00109_[cyt] + C00014_[cyt]	Asparagine, Aspartate, Lysine and Threonine	A
R66	sll1172	4.2.3.1	O-Phospho-L-homoserine_[cyt] + H2O_[cyt] => L-Threonine_[cyt] + Orthophosphate_[cyt]	R01466	C01102_[cyt] + C00001_[cyt] => C00188_[cyt] + C00009_[cyt]	Asparagine, Aspartate, Lysine and Threonine	A
R67	sll1688	4.2.3.1	O-Phospho-L-homoserine_[cyt] + H2O_[cyt] => L-Threonine_[cyt] + Orthophosphate_[cyt]	R01466	C01102_[cyt] + C00001_[cyt] => C00188_[cyt] + C00009_[cyt]	Asparagine, Aspartate, Lysine and Threonine	A
R68	sll1760	2.7.1.39	ATP_[cyt] + L-Homoserine_[cyt] => ADP_[cyt] + O-Phospho-L-homoserine_[cyt]	R01771	C00002_[cyt] + C00263_[cyt] => C00008_[cyt] + C01102_[cyt]	Asparagine, Aspartate, Lysine and Threonine	A
R69	sll0455	1.1.1.3	L-Homoserine_[cyt] + NADP+_[cyt] <= L-Aspartate 4-semialdehyde_[cyt] + NADPH_[cyt] + H+_[cyt]	R01775	C00263_[cyt] + C00006_[cyt] <= C00441_[cyt] + C00005_[cyt] + C00080_[cyt]	Asparagine, Aspartate, Lysine and Threonine	A
R70	slr0549	1.2.1.11	L-Aspartate 4-semialdehyde_[cyt] + Orthophosphate_[cyt] + NADP+_[cyt] <= 4-Phospho-L-aspartate_[cyt] + NADPH_[cyt] + H+_[cyt]	R02291	C00441_[cyt] + C00009_[cyt] + C00006_[cyt] <= C03082_[cyt] + C00005_[cyt] + C00080_[cyt]	Asparagine, Aspartate, Lysine and Threonine	A
R71	slr0657	2.7.2.4	ATP_[cyt] + L-Aspartate_[cyt] => ADP_[cyt] + 4-Phospho-L-aspartate_[cyt]	R00480	C00002_[cyt] + C00049_[cyt] => C00008_[cyt] + C03082_[cyt]	Asparagine, Aspartate, Lysine and Threonine	A
R72	slr0550	4.2.1.52	L-Aspartate 4-semialdehyde_[cyt] + Pyruvate_[cyt] => L-2,3-Dihydrodipicolinate_[cyt] + 2 H2O_[cyt]	R02292	C00441_[cyt] + C00022_[cyt] => C03340_[cyt] + 2 C00001_[cyt]	Asparagine, Aspartate, Lysine and Threonine	A
R73	sll1058	1.3.1.26	2,3,4,5-Tetrahydrodipicolinate_[cyt] + NADP+_[cyt] <= L-2,3-Dihydrodipicolinate_[cyt] + NADPH_[cyt] + H+_[cyt]	R04199	C03972_[cyt] + C00006_[cyt] <= C03340_[cyt] + C00005_[cyt] + C00080_[cyt]	Asparagine, Aspartate, Lysine and Threonine	A
R74	sll0480	2.6.1.83	LL-2,6-Diaminoheptanedioate_[cyt] + 2-Oxoglutarate_[cyt] <= 2,3,4,5-Tetrahydrodipicolinate_[cyt] + L-Glutamate_[cyt] + H2O_[cyt]	R07613	C00666_[cyt] + C00026_[cyt] <= C03972_[cyt] + C00025_[cyt] + C00001_[cyt]	Asparagine, Aspartate, Lysine and Threonine	A	Hudson et al. 2006
R75	slr1665	5.1.1.7	LL-2,6-Diaminoheptanedioate_[cyt] <=> meso-2,6-Diaminoheptanedioate_[cyt]	R02735	C00666_[cyt] <=> C00680_[cyt]	Asparagine, Aspartate, Lysine and Threonine	A
R76	sll0504	4.1.1.20	meso-2,6-Diaminoheptanedioate_[cyt] => L-Lysine_[cyt] + CO2_[cyt]	R00451	C00680_[cyt] => C00047_[cyt] + C00011_[cyt]	Asparagine, Aspartate, Lysine and Threonine	A
R77	-	6.3.5.4	ATP_[cyt] + L-Aspartate_[cyt] + L-Glutamine_[cyt] + H2O_[cyt] => AMP_[cyt] + Diphosphate_[cyt] + L-Asparagine_[cyt] + L-Glutamate_[cyt]	R00578	C00002_[cyt] + C00049_[cyt] + C00064_[cyt] + C00001_[cyt] => C00020_[cyt] + C00013_[cyt] + C00152_[cyt] + C00025_[cyt]	Asparagine, Aspartate, Lysine and Threonine	E	No enzyme for the synthesis of asparagine could been identified for Synechocystis sp. PCC6803
R78	sll0422	3.5.1.1	L-Asparagine_[cyt] + H2O_[cyt] => L-Aspartate_[cyt] + NH3_[cyt]	R00485	C00152_[cyt] + C00001_[cyt] => C00049_[cyt] + C00014_[cyt]	Asparagine, Aspartate, Lysine and Threonine	A
R79	sll0585	3.5.1.1	L-Asparagine_[cyt] + H2O_[cyt] => L-Aspartate_[cyt] + NH3_[cyt]	R00485	C00152_[cyt] + C00001_[cyt] => C00049_[cyt] + C00014_[cyt]	Asparagine, Aspartate, Lysine and Threonine	A
R80	sll0776	2.7.1.-	L-Threonine_[cyt] + ATP_[cyt] => L-Threonine O-3-phosphate_[cyt] + ADP_[cyt]	R06531	C00188_[cyt] + C00002_[cyt] => C12147_[cyt] + C00008_[cyt]	Asparagine, Aspartate, Lysine and Threonine	A	Threonine kinase
R81	sll1713	4.1.1.81	L-Threonine O-3-phosphate_[cyt] => D-1-Aminopropan-2-ol O-phosphate_[cyt] + CO2_[cyt]	R06530	C12147_[cyt] => C04122_[cyt] + C00011_[cyt]	Asparagine, Aspartate, Lysine and Threonine	C	BLAST search: identity 57.5 %, score 414, E-value e-117, to threonine-phosphate decarboxylase from Anabaena variabilis ATCC 29413
R82	BioPro	-	0.766 L-Alanine_[cyt] + 0.455 L-Arginine_[cyt] + 0.366 L-Asparagine_[cyt] + 0.454 C00049_[cyt] + 0.090 L-Aspartate_[cyt] + 0.502 L-Glutamine_[cyt] + 0.546 L-Glutamate_[cyt] + 0.666 Glycine_[cyt] + 0.168 L-Histidine_[cyt] + 0.566 L-Isoleucine_[cyt] + 1.029	-	0.766 C00041_[cyt] + 0.455 C00062_[cyt] + 0.366 C00152_[cyt] + 0.454 C00049_[cyt] + 0.090 C00097_[cyt] + 0.502 C00064_[cyt] + 0.546 C00025_[cyt] + 0.666 C00037_[cyt] + 0.168 C00135_[cyt] + 0.566 C00407_[cyt] + 1.029 C00123_[cyt] + 0.378 C00047_[cyt] + 0.1	General	-	Protein fraction of Biomass
R83	BioDNA	-	0.7749 dCTP_[cyt] + 0.8517 dTTP_[cyt] + 0.7772 dGTP_[cyt] + 0.8487 dATP_[cyt] => 1 TB2_[cyt] + 3.2525 PPi_[cyt]	-	0.7749 C00458_[cyt] + 0.8487 C00131_[cyt] + 0.7772 C00286_[cyt] + 0.8517 C00459_[cyt] => 1 TB2_[cyt] + 3.2525 C00013_[cyt]	General	-	DNA fraction of Biomass
R84	BioRNA	-	0.8080 GTP_[cyt] + 0.7300 ATP_[cyt] + 0.7799 CTP_[cyt] + 0.8012 UTP_[cyt] => 1 TB3_[cyt] + 3.1191 PPi_[cyt]	-	0.8080 C00044_[cyt] + 0.7300 C00002_[cyt] + 0.7799 C00063_[cyt] + 0.8012 C00075_[cyt] => 1 TB3_[cyt] + 3.1191 C00013_[cyt]	General	-	RNA fraction of Biomass
R85	BioCellwall	-	0.4276 Lipid-A-disaccharide + 0.4276 [GlcNAc-(1->4)-Mur2Ac(oyl-L-Ala-g-D-Glu-A2pm-D-Ala-D-Ala)]n-diphosphoundecaprenol_[cyt] => 1 TB4_[cyt]	-	0.4276 C04932_[cyt] + 0.4276 C11827_[cyt] => 1 TB4_[cyt]	General	-	Cell wall fraction of Biomass
R86	BioLip	-	0.380 3-beta-D-Galactosyl-1,2-diacylglycerol_MDGD_[cyt] + 0.2650 Digalactosyl-diacylglycerol_DGDG_[cyt] + 0.2550 Sulfoquinovosyldiacylglycerol_SQDG_[cyt] + 0.100 Phosphatidylglycerol_PG_[cyt] => 1 TB5_[cyt]	-	0.380 C03692_MGDG_[cyt] + 0.2650 C06037_DGDG_[cyt] + 0.2550 C13508_SQDG_[cyt] + 0.1000 C00344_PG_[cyt] => 1 TB5_[cyt]	General	-	Lipid fraction of Biomass
R87	BioPool	-	1.147 Putrescine_[cyt] + 0.233 Spermidine_[cyt] + 0.010 Acetyl-CoA_[cyt] + 0.006 CoA_[cyt] + 0.003 Succinyl-CoA_[cyt] + 0.001 Malonyl-CoA_[cyt] + 0.062 NAD+_[cyt] + 0.002 NADH_[cyt] + 0.004 NADPH_[cyt] + 0.012 NADP_[cyt] + 0.008 FAD_[cyt] + 0.008 Tetrahyd	-	1.147 C00134_[cyt] + 0.233 C00315_[cyt] + 0.010 C00024_[cyt] + 0.006 C00010_[cyt] + 0.003 C00091_[cyt] + 0.001 C00083_[cyt] + 0.062 C00003_[cyt] + 0.002 C00004_[cyt] + 0.004 C00006_[cyt] + 0.012 C00005_[cyt] + 0.008 C00016_[cyt] + 0.008 C00101_[cyt] + 0.0	General	-	Pool fraction of Biomass
R88	BioIons	-	17.040 Potassium_[cyt] + 1.136 NH4+_[cyt] + 0.757 Magnesium_[cyt] + 0.454 Calcium_[cyt] + 0.682 Fe2+_[cyt] + 0.682 Fe3+_[cyt] + 0.303 Copper_[cyt] + 0.303 Manganese_[cyt] + 0.303 Molybdate_[cyt] + 0.303 Cobalt ion_[cyt] + 0.303 Zinc_[cyt] + 0.379 Sulfate_	-	17.040 C00238_[cyt] + 1.136 C01342_[cyt] + 0.757 C00305_[cyt] + 0.454 C00076_[cyt] + 0.682 C14818_[cyt] + 0.682 C14819_[cyt] + 0.303 C00070_[cyt] + 0.303 C00034_[cyt] + 0.303 C06232_[cyt] + 0.303 C00175_[cyt] + 0.303 C00038_[cyt] + 0.379 C00059_[cyt] + 0.	General	-	Inorganic Ion fraction of Biomass
R89	BioPigs	-	0.827 Chlorophyll a_[cyt] + 0.134 beta-Carotene_[cyt] + 0.113 Zeaxanthin_[cyt] + 0.098 Echinenone_[cyt] + 0.063 gamma-Carotene_[cyt] + 0.010 alpha-Tocopherol_[cyt] + 0.001 beta-Tocopherol_[cyt] + 0.001 gamma-Tocopherol_[cyt] + 0.009 delta-Tocopherol_[cyt]	-	0.827 C05306_[cyt] + 0.134 C02094_[cyt] + 0.113 C06098_[cyt] + 0.098 C08592_[cyt] + 0.063 C05435_[cyt] + 0.010 C02477_[cyt] + 0.001 C14152_[cyt] + 0.001 C02483_[cyt] + 0.009 C14151_[cyt] + 0.067 C02059_[cyt] => 1 TB8_[cyt]	General	-	Pigment fraction of Biomass
R90	Biomass	-	53.350 ATP_[cyt] + 53.350 H2O_[cyt] + 0.51 TB1_[cyt] + 0.031 TB2_[cyt] + 0.17 TB3_[cyt] + 0.059 TB4_[cyt] + 0.12 TB5_[cyt] + 0.029 TB6_[cyt] + 0.01 TB7_[cyt] + 0.0244 TB8_[cyt] + 0.21031 Glycogen => 1 Biomass_[ext] + 53.350 ADP + 53.350 Pi	-	53.350 C00002_[cyt] + 53.350 C00001_[cyt] + 0.51 TB1_[cyt] + 0.031 TB2_[cyt] + 0.17 TB3_[cyt] + 0.059 TB4_[cyt] + 0.12 TB5_[cyt] + 0.029 TB6_[cyt] + 0.01 TB7_[cyt] + 0.0244 TB8_[cyt] + 0.21031 C00182_[cyt] => 1 B0_[ext] + 53.350 C00008_[cyt] + 53.350 C000	General	-	Biomass
R91	slr1255	2.5.1.32	2 Geranylgeranyl diphosphate_[cyt] => Diphosphate_[cyt] + Prephytoene diphosphate_[cyt]	R02065	2 C00353_[cyt] => C00013_[cyt] + C03427_[cyt]	Carotenoid	A
R92	slr1255	2.5.1.32	Prephytoene diphosphate_[cyt] => Phytoene_[cyt] + Diphosphate_[cyt]	R07270	C03427_[cyt] => C05413_[cyt] + C00013_[cyt]	Carotenoid	A
R93	slr1254	1.14.99.-	Phytoene_[cyt] + NADP+_[cyt] => all-trans-Phytofluene_[cyt] + NADPH_[cyt] + H+_[cyt]	-	C05413_[cyt] + C00006_[cyt] => C05414_[cyt] + C00005_[cyt] + C00080_[cyt]	Carotenoid	A	Schneider et al. 1997
R94	slr1254	1.14.99.-	all-trans-Phytofluene_[cyt] + NADP+_[cyt] => all-trans-zeta-Carotene_[cyt] + NADPH_[cyt] + H+_[cyt]	-	C05414_[cyt] + C00006_[cyt] => C05430_[cyt] + C00005_[cyt] + C00080_[cyt]	Carotenoid	A	Schneider et al. 1997
R95	sll0033, slr0940	-	all-trans-zeta-Carotene_[cyt] + NADPH_[cyt] + H+_[cyt] + Oxygen_[cyt] => all-trans-Neurosporene_[cyt] + 2 H2O_[cyt] + NADP+_[cyt]	-	C05430_[cyt] + C00005_[cyt] + C00080_[cyt] + C00007_[cyt] => C05431_[cyt] + 2 C00001_[cyt] + C00006_[cyt]	Carotenoid	A	Breitenbach 1998, 2001; Masamoto et al. 2001
R96	sll0033, slr0940	-	all-trans-Neurosporene_[cyt] + NADPH_[cyt] + H+_[cyt] + Oxygen_[cyt] => Lycopene_[cyt] + 2 H2O_[cyt] + NADP+_[cyt]	-	C05431_[cyt] + C00005_[cyt] + C00080_[cyt] + C00007_[cyt] => C05432_[cyt] + 2 C00001_[cyt] + C00006_[cyt]	Carotenoid	A	Breitenbach 1998, 2001; Masamato et al. 2001
R97	sll0147	-	Lycopene_[cyt] <=> gamma-Carotene_[cyt]	R05341	C05432_[cyt] <=> C05435_[cyt]	Carotenoid	A	Takaichi and Mochimaru 2007
R98	sll0147	-	gamma-Carotene_[cyt] <=> beta-Carotene_[cyt]	R03824	C05435_[cyt] <=> C02094_[cyt]	Carotenoid	A	Takaichi and Mochimaru 2007
R99	sll1468	1.14.13.-	beta-Carotene_[cyt] + NADH_[cyt] + H+_[cyt] + Oxygen_[cyt] => beta-Cryptoxanthin_[cyt] + NAD+_[cyt] + H2O_[cyt]	R07558	C02094_[cyt] + C00004_[cyt] + C00080_[cyt] + C00007_[cyt] => C08591_[cyt] + C00003_[cyt] + C00001_[cyt]	Carotenoid	A	Takaichi and Mochimaru 2007
R100	sll1468	1.14.13.-	beta-Cryptoxanthin_[cyt] + NADH_[cyt] + H+_[cyt] + Oxygen_[cyt] => Zeaxanthin_[cyt] + NAD+_[cyt] + H2O_[cyt]	R07559	C08591_[cyt] + C00004_[cyt] + C00080_[cyt] + C00007_[cyt] => C06098_[cyt] + C00003_[cyt] + C00001_[cyt]	Carotenoid	A	Takaichi and Mochimaru 2007
R101	sll1468	1.14.13.-	Echinenone_[cyt] + NADH_[cyt] + H+_[cyt] + Oxygen_[cyt] => 3-Hydroxyechinenone_[cyt] + NAD+_[cyt] + H2O_[cyt]	R07562	C08592_[cyt] + C00004_[cyt] + C00080_[cyt] + C00007_[cyt] => C15966_[cyt] + C00003_[cyt] + C00001_[cyt]	Carotenoid	A	Takaichi and Mochimaru 2007
R102	slr0088	-	beta-Carotene_[cyt] + NADPH_[cyt] + H+_[cyt] + Oxygen_[cyt] => Echinenone_[cyt] + NADP+_[cyt] + H2O_[cyt] + H+_[cyt]	-	C02094_[cyt] + C00005_[cyt] + C00080_[cyt] + C00007_[cyt] => C08592_[cyt] + C00006_[cyt] + C00001_[cyt] + C00080_[cyt]	Carotenoid	A	Fernández-González et al. 1997
R103	sll0179	6.1.1.17	tRNA(Glu)_[cyt] + L-Glutamate_[cyt] + ATP_[cyt] => L-Glutamyl-tRNA(Glu)_[cyt] + Diphosphate_[cyt] + AMP_[cyt]	R05578	C01641_[cyt] + C00025_[cyt] + C00002_[cyt] => C02987_[cyt] + C00013_[cyt] + C00020_[cyt]	Chlorophyll	A
R104	slr1808	1.2.1.70	L-Glutamyl-tRNA(Glu)_[cyt] + NADPH_[cyt] + H+_[cyt] => (S)-4-Amino-5-oxopentanoate_[cyt] + tRNA(Glu)_[cyt] + NADP+_[cyt]	R04109	C02987_[cyt] + C00005_[cyt] + C00080_[cyt] => C03741_[cyt] + C01641_[cyt] + C00006_[cyt]	Chlorophyll	A
R105	sll0017	5.4.3.8	5-Aminolevulinate_[cyt] <=> (S)-4-Amino-5-oxopentanoate_[cyt]	R02272	C00430_[cyt] <=> C03741_[cyt]	Chlorophyll	A
R106	sll1994	4.2.1.24	2 5-Aminolevulinate_[cyt] => Porphobilinogen_[cyt] + 2 H2O_[cyt]	R00036	2 C00430_[cyt] => C00931_[cyt] + 2 C00001_[cyt]	Chlorophyll	A
R107	slr1887	2.5.1.61	4 Porphobilinogen_[cyt] + H2O_[cyt] <=> Hydroxymethylbilane_[cyt] + 4 NH3_[cyt]	R00084	4 C00931_[cyt] + C00001_[cyt] => C01024_[cyt] + 4 C00014_[cyt]	Chlorophyll	A
R108	sll0166	4.2.1.75	Hydroxymethylbilane_[cyt] => Uroporphyrinogen III_[cyt] + H2O_[cyt]	R03165	C01024_[cyt] => C01051_[cyt] + C00001_[cyt]	Chlorophyll	A
R109	slr0536	4.1.1.37	Uroporphyrinogen III_[cyt] => Coproporphyrinogen III_[cyt] + 4 CO2_[cyt]	R03197	C01051_[cyt] => C03263_[cyt] + 4 C00011_[cyt]	Chlorophyll	A
R110	sll1185	1.3.3.3	Coproporphyrinogen III_[cyt] + Oxygen_[cyt] => Protoporphyrinogen IX_[cyt] + 2 CO2_[cyt] + 2 H2O_[cyt]	R03220	C03263_[cyt] + C00007_[cyt] => C01079_[cyt] + 2 C00011_[cyt] + 2 C00001_[cyt]	Chlorophyll	A
R111	sll1876	1.3.99.22	Coproporphyrinogen III_[cyt] + 2 S-Adenosyl-L-methionine_[cyt] => Protoporphyrinogen IX_[cyt] + 2 CO2_[cyt] + 2 L-Methionine_[cyt] + 2 5'-Deoxyadenosine_[cyt]	R06895	C03263_[cyt] + 2 C00019_[cyt] => C01079_[cyt] + 2 C00011_[cyt] + 2 C00073_[cyt] + 2 C05198_[cyt]	Chlorophyll	A
R112	sll1917	1.3.99.22	Coproporphyrinogen III_[cyt] + 2 S-Adenosyl-L-methionine_[cyt] => Protoporphyrinogen IX_[cyt] + 2 CO2_[cyt] + 2 L-Methionine_[cyt] + 2 5'-Deoxyadenosine_[cyt]	R06895	C03263_[cyt] + 2 C00019_[cyt] => C01079_[cyt] + 2 C00011_[cyt] + 2 C00073_[cyt] + 2 C05198_[cyt]	Chlorophyll	A
R113	sll1237	1.3.3.4	2 Protoporphyrinogen IX_[cyt] + 3 Oxygen_[cyt] <=> 2 Protoporphyrin_[cyt] + 6 H2O_[cyt]	R03222	2 C01079_[cyt] + 3 C00007_[cyt] => 2 C02191_[cyt] + 6 C00001_[cyt]	Chlorophyll	C	BLAST search: identity 54%, score 308, E-value 4e-85 to protoporphyrinogen oxidase from Anabaena sp. PCC 7120
R114	slr1790	1.3.3.4	2 Protoporphyrinogen IX_[cyt] + 3 Oxygen_[cyt] <=> 2 Protoporphyrin_[cyt] + 6 H2O_[cyt]	R03222	2 C01079_[cyt] + 3 C00007_[cyt] => 2 C02191_[cyt] + 6 C00001_[cyt]	Chlorophyll	B	Kato et al. 2010
R115	slr1030, slr1055, slr1777	6.6.1.1	ATP_[cyt] + Protoporphyrin_[cyt] + Magnesium_[cyt] + H2O_[cyt] => ADP_[cyt] + Orthophosphate_[cyt] + Magnesium protoporphyrin_[cyt] + 2 H+_[cyt]	R03877	C00002_[cyt] + C02191_[cyt] + C00305_[cyt] + C00001_[cyt] => C00008_[cyt] + C00009_[cyt] + C03516_[cyt] + 2 C00080_[cyt]	Chlorophyll	A
R116	slr0525	2.1.1.11	S-Adenosyl-L-methionine_[cyt] + Magnesium protoporphyrin_[cyt] => S-Adenosyl-L-homocysteine_[cyt] + Magnesium protoporphyrin monomethyl ester_[cyt]	R04237	C00019_[cyt] + C03516_[cyt] => C00021_[cyt] + C04536_[cyt]	Chlorophyll	A
R117	sll1874	1.14.13.81	Magnesium protoporphyrin monomethyl ester_[cyt] + NADPH_[cyt] + H+_[cyt] + Oxygen_[cyt] => 13(1)-Hydroxy-magnesium-protoporphyrin IX 13-monomethyl ester_[cyt] + NADP+_[cyt] + H2O_[cyt]	R06265	C04536_[cyt] + C00005_[cyt] + C00080_[cyt] + C00007_[cyt] => C11829_[cyt] + C00006_[cyt] + C00001_[cyt]	Chlorophyll	A
R118	slr0905	-	Magnesium protoporphyrin monomethyl ester_[cyt] + NADPH_[cyt] + H+_[cyt] + Oxygen_[cyt] => 13(1)-Hydroxy-magnesium-protoporphyrin IX 13-monomethyl ester_[cyt] + NADP+_[cyt] + H2O_[cyt]	R06265	C04536_[cyt] + C00005_[cyt] + C00080_[cyt] + C00007_[cyt] => C11829_[cyt] + C00006_[cyt] + C00001_[cyt]	Chlorophyll	A
R119	sll1214	1.14.13.81	Magnesium protoporphyrin monomethyl ester_[cyt] + NADPH_[cyt] + H+_[cyt] + Oxygen_[cyt] => 13(1)-Hydroxy-magnesium-protoporphyrin IX 13-monomethyl ester_[cyt] + NADP+_[cyt] + H2O_[cyt]	R06265	C04536_[cyt] + C00005_[cyt] + C00080_[cyt] + C00007_[cyt] => C11829_[cyt] + C00006_[cyt] + C00001_[cyt]	Chlorophyll	A
R120	sll1874	1.14.13.81	13(1)-Hydroxy-magnesium-protoporphyrin IX 13-monomethyl ester_[cyt] + NADPH_[cyt] + H+_[cyt] + Oxygen_[cyt] => 13(1)-Oxo-magnesium-protoporphyrin IX 13-monomethyl ester_[cyt] + NADP+_[cyt] + 2 H2O_[cyt]	R06266	C11829_[cyt] + C00005_[cyt] + C00080_[cyt] + C00007_[cyt] => C11830_[cyt] + C00006_[cyt] + 2 C00001_[cyt]	Chlorophyll	A
R121	slr0905	-	13(1)-Hydroxy-magnesium-protoporphyrin IX 13-monomethyl ester_[cyt] + NADPH_[cyt] + H+_[cyt] + Oxygen_[cyt] => 13(1)-Oxo-magnesium-protoporphyrin IX 13-monomethyl ester_[cyt] + NADP+_[cyt] + 2 H2O_[cyt]	R06266	C11829_[cyt] + C00005_[cyt] + C00080_[cyt] + C00007_[cyt] => C11830_[cyt] + C00006_[cyt] + 2 C00001_[cyt]	Chlorophyll	A
R122	sll1214	1.14.13.81	13(1)-Hydroxy-magnesium-protoporphyrin IX 13-monomethyl ester_[cyt] + NADPH_[cyt] + H+_[cyt] + Oxygen_[cyt] => 13(1)-Oxo-magnesium-protoporphyrin IX 13-monomethyl ester_[cyt] + NADP+_[cyt] + 2 H2O_[cyt]	R06266	C11829_[cyt] + C00005_[cyt] + C00080_[cyt] + C00007_[cyt] => C11830_[cyt] + C00006_[cyt] + 2 C00001_[cyt]	Chlorophyll	A
R123	sll1874	1.14.13.81	13(1)-Oxo-magnesium-protoporphyrin IX 13-monomethyl ester_[cyt] + NADPH_[cyt] + H+_[cyt] + Oxygen_[cyt] => Divinylprotochlorophyllide_[cyt] + NADP+_[cyt] + 2 H2O_[cyt]	R06267	C11830_[cyt] + C00005_[cyt] + C00080_[cyt] + C00007_[cyt] => C11831_[cyt] + C00006_[cyt] + 2 C00001_[cyt]	Chlorophyll	A
R124	slr0905	-	13(1)-Oxo-magnesium-protoporphyrin IX 13-monomethyl ester_[cyt] + NADPH_[cyt] + H+_[cyt] + Oxygen_[cyt] => Divinylprotochlorophyllide_[cyt] + NADP+_[cyt] + 2 H2O_[cyt]	R06267	C11830_[cyt] + C00005_[cyt] + C00080_[cyt] + C00007_[cyt] => C11831_[cyt] + C00006_[cyt] + 2 C00001_[cyt]	Chlorophyll	A
R125	sll1214	1.14.13.81	13(1)-Oxo-magnesium-protoporphyrin IX 13-monomethyl ester_[cyt] + NADPH_[cyt] + H+_[cyt] + Oxygen_[cyt] => Divinylprotochlorophyllide_[cyt] + NADP+_[cyt] + 2 H2O_[cyt]	R06267	C11830_[cyt] + C00005_[cyt] + C00080_[cyt] + C00007_[cyt] => C11831_[cyt] + C00006_[cyt] + 2 C00001_[cyt]	Chlorophyll	A
R126	slr1923	1.3.1.75	Divinylprotochlorophyllide_[cyt] + NADPH_[cyt] + H+_[cyt] => Protochlorophyllide_[cyt] + NADP+_[cyt]	R06896	C11831_[cyt] + C00005_[cyt] + C00080_[cyt] => C02880_[cyt] + C00006_[cyt]	Chlorophyll	B	Ito et al. 2008; Islam et al. 2008
R127	slr0506	1.3.1.33	Chlorophyllide_[cyt] + NADP+_[cyt] <= Protochlorophyllide_[cyt] + NADPH_[cyt] + H+_[cyt]	R03845	C02139_[cyt] + C00006_[cyt] <= C02880_[cyt] + C00005_[cyt] + C00080_[cyt]	Chlorophyll	A	light dependent
R128	slr0749, slr0750, slr0772	1.3.7.7	Protochlorophyllide_[cyt] + Oxidized ferredoxin_[cyt] + 2 ADP_[cyt] + 2 Orthophosphate_[cyt] => Chlorophyllide_[cyt] + Reduced ferredoxin_[cyt] + 2 ATP_[cyt]	R06282	C02880_[cyt] + C00139_[cyt] + 2 C00008_[cyt] + 2 C00009_[cyt] => C02139_[cyt] + C00138_[cyt] + 2 C00002_[cyt]	Chlorophyll	A	light independent
R129	slr0056	2.5.1.62	Chlorophyllide_[cyt] + Phytyl diphosphate_[cyt] => Chlorophyll a_[cyt] + Diphosphate_[cyt]	R06284	C02139_[cyt] + C05427_[cyt] => C05306_[cyt] + C00013_[cyt]	Chlorophyll	A
R130	slr2141	1.5.1.20	5-Methyltetrahydrofolate_[cyt] + NADP+_[cyt] <= 5,10-Methylenetetrahydrofolate_[cyt] + NADPH_[cyt] + H+_[cyt]	R01224	C00440_[cyt] + C00006_[cyt] <= C00143_[cyt] + C00005_[cyt] + C00080_[cyt]	Folate	C	BLAST search: 75 % identity, 450 Score and E-value e-128 to methylenetetrahydrofolate reductase from Cyanothece sp. PCC 8801 ; Unclear if NADP or NAD serves as electron acceptor
R131	slr0426	3.5.4.16	GTP_[cyt] + H2O_[cyt] => 2-Amino-4-hydroxy-6-(erythro-1,2,3-trihydroxypropyl)dihydropteridine triphosphate_[cyt] + Formate_[cyt]	R00424	C00044_[cyt] + C00001_[cyt] => C04895_[cyt] + C00058_[cyt]	Folate	A
R132	sll1076 or slr0787 or slr0920	3.6.1.-	2-Amino-4-hydroxy-6-(erythro-1,2,3-trihydroxypropyl)dihydropteridine triphosphate_[cyt] + H2O_[cyt] => Dihydroneopterin phosphate_[cyt] + Diphosphate_[cyt]	R04638	C04895_[cyt] + C00001_[cyt] => C05925_[cyt] + C00013_[cyt]	Folate	A
R133	sll1076 or slr0787 or slr0920	3.6.1.-	2-Amino-4-hydroxy-6-(D-erythro-1,2,3-trihydroxypropyl)-7,8-dihydropteridine_[cyt] + Orthophosphate_[cyt] <= Dihydroneopterin phosphate_[cyt] + H2O_[cyt]	R04621	C04874_[cyt] + C00009_[cyt] <= C05925_[cyt] + C00001_[cyt]	Folate	A
R134	slr1626	4.1.2.25	2-Amino-4-hydroxy-6-(D-erythro-1,2,3-trihydroxypropyl)-7,8-dihydropteridine_[cyt] => Glycolaldehyde_[cyt] + 2-Amino-4-hydroxy-6-hydroxymethyl-7,8-dihydropteridine_[cyt]	R03504	C04874_[cyt] => C00266_[cyt] + C01300_[cyt]	Folate	A
R135	slr0091	1.2.1.3	Glycolaldehyde_[cyt] + NAD+_[cyt] + H2O_[cyt] => Glycolate_[cyt] + NADH_[cyt] + H+_[cyt]	R01333	C00266_[cyt] + C00003_[cyt] + C00001_[cyt] => C00160_[cyt] + C00004_[cyt] + C00080_[cyt]	Folate	D	maybe catalyzed by the aldehyhyrogenase 1.2.1.21
R136	slr1093	2.7.6.3	ATP_[cyt] + 2-Amino-4-hydroxy-6-hydroxymethyl-7,8-dihydropteridine_[cyt] => AMP_[cyt] + 2-Amino-7,8-dihydro-4-hydroxy-6-(diphosphooxymethyl)pteridine_[cyt]	R03503	C00002_[cyt] + C01300_[cyt] <=> C00020_[cyt] + C04807_[cyt]	Folate	A
R137	slr2026	2.5.1.15	2-Amino-7,8-dihydro-4-hydroxy-6-(diphosphooxymethyl)pteridine_[cyt] + 4-Aminobenzoate_[cyt] => Diphosphate_[cyt] + Dihydropteroate_[cyt]	R03067	C04807_[cyt] + C00568_[cyt] => C00013_[cyt] + C00921_[cyt]	Folate	A
R138	slr2026	2.5.1.15	2-Amino-4-hydroxy-6-hydroxymethyl-7,8-dihydropteridine_[cyt] + 4-Aminobenzoate_[cyt] => Dihydropteroate_[cyt] + H2O_[cyt]	R03066	C01300_[cyt] + C00568_[cyt] => C00921_[cyt] + C00001_[cyt]	Folate	A
R139	slr0887	4.1.3.38	4-Amino-4-deoxychorismate_[cyt] => 4-Aminobenzoate_[cyt] + Pyruvate_[cyt]	R05553	C11355_[cyt] => C00568_[cyt] + C00022_[cyt]	Folate	A
R140	slr1979	2.6.1.85	Chorismate_[cyt] + L-Glutamine_[cyt] => 4-Amino-4-deoxychorismate_[cyt] + L-Glutamate_[cyt]	R01716	C00251_[cyt] + C00064_[cyt] => C11355_[cyt] + C00025_[cyt]	Folate	C	BLAST search: 63.5 % identity, 574 Score and E-value e-165 to para-aminobenzoate synthase component I from Cyanothece sp. PCC 8801
R141	sll1612	6.3.2.17	ATP_[cyt] + Dihydropteroate_[cyt] + L-Glutamate_[cyt] => ADP_[cyt] + Orthophosphate_[cyt] + Dihydrofolate_[cyt]	R02237	C00002_[cyt] + C00921_[cyt] + C00025_[cyt] => C00008_[cyt] + C00009_[cyt] + C00415_[cyt]	Folate	A
R142	sll1612	6.3.2.12	ATP_[cyt] + Dihydropteroate_[cyt] + L-Glutamate_[cyt] => ADP_[cyt] + Orthophosphate_[cyt] + Dihydrofolate_[cyt]	R02237	C00002_[cyt] + C00921_[cyt] + C00025_[cyt] => C00008_[cyt] + C00009_[cyt] + C00415_[cyt]	Folate	A
R143	slr2026	1.5.1.3	Tetrahydrofolate_[cyt] + NADP+_[cyt] <= Dihydrofolate_[cyt] + NADPH_[cyt] + H+_[cyt]	R00939	C00101_[cyt] + C00006_[cyt] <= C00415_[cyt] + C00005_[cyt] + C00080_[cyt]	Folate	D	slr2026 is coding for FoIP (2.5.1.15 ) which also can as a dihydropteroate reductase 1.5.1.3 (at least in H. pylori); Levin et al. 2007
R144	sll0070	3.5.1.10	10-Formyltetrahydrofolate_[cyt] + H2O_[cyt] => Formate_[cyt] + Tetrahydrofolate_[cyt]	R00944	C00234_[cyt] + C00001_[cyt] => C00058_[cyt] + C00101_[cyt]	Folate	A
R145	sll0753	3.5.4.9	5,10-Methenyltetrahydrofolate_[cyt] + H2O_[cyt] <=> 10-Formyltetrahydrofolate_[cyt] + H+_[cyt]	R01655	C00445_[cyt] + C00001_[cyt] <=> C00234_[cyt] + C00080_[cyt]	Folate	A
R146	sll0753	1.5.1.5	5,10-Methylenetetrahydrofolate_[cyt] + NADP+_[cyt] <=> 5,10-Methenyltetrahydrofolate_[cyt] + NADPH_[cyt]	R01220	C00143_[cyt] + C00006_[cyt] <=> C00445_[cyt] + C00005_[cyt]	Folate	A
R147	-	-	1 ATP_[cyt] + H2O_[cyt] => 1 ADP_[cyt] + Orthophosphate_[cyt]	-	C00002_[cyt] + C00001_[cyt] => C00008_[cyt] + C00009_[cyt]	General	-	ATP Hydrolysis
R148	-	-	1 HCO3-_[cax] + 1 H+_[cax] <=> 1 H2CO3_[cax]	-	C00288_[cax] + C00080_[cax] <=> C01353_[cax]	General	A	spontaneous
R149	slr0600	1.8.1.9	Thioredoxin_[cyt] + NADP+_[cyt] <= Thioredoxin disulfide_[cyt] + NADPH_[cyt] + H+_[cyt]	R02016	C00342_[cyt] + C00006_[cyt] <= C00343_[cyt] + C00005_[cyt] + C00080_[cyt]	General	A
R150	slr0051	4.2.1.1	H2CO3_[cax] <=> CO2_[cax] + H2O_[cax]	R00132	C01353_[cax] <=> C00011_[cax] + C00001_[cax]	General	A
R151	slr1347	4.2.1.1	H2CO3_[cax] <=> CO2_[cax] + H2O_[cax]	R00132	C01353_[cax] <=> C00011_[cax] + C00001_[cax]	General	A
R152	slr1622	3.6.1.1	Diphosphate_[cyt] + H2O_[cyt] => 2 Orthophosphate_[cyt]	R00004	C00013_[cyt] + C00001_[cyt] => 2 C00009_[cyt]	General	A
R153	sll0290	2.7.4.1	ATP_[cyt] + Diphosphate_[cyt] <=> ADP_[cyt] + Triphosphate_[cyt]	-	1 C00013_[cyt] + 1 C00002_[cyt] <=> 1 C00008_[cyt] + 1 C00536_[cyt]	General	A
R154	sll0290	2.7.4.1	ATP_[cyt] + Orthophosphate_[cyt] <=> ADP_[cyt] + Diphosphate_[cyt]	-	1 C00009_[cyt] + 1 C00002_[cyt] <=> 1 C00008_[cyt] + 1 C00013_[cyt]	General	A
R155	slr1239, slr1434	1.6.1.2	NADPH_[cyt] + H+_[cyt] + NAD+_[cyt] <=> NADP+_[cyt] + H+_[cyt] + NADH_[cyt]	R00112	C00005_[cyt] + C00003_[cyt] <=> C00006_[cyt] + C00004_[cyt]	General	A	NAD(P) Transhydrogenase
R156	slr1516	1.15.1.1	2 Superoxide anion_[cyt] + 2 H+_[cyt] => H2O2_[cyt] + Oxygen_[cyt]	R00275	2 C00704_[cyt] + 2 C00080_[cyt] => C00027_[cyt] + C00007_[cyt]	General	A
R157	sll1987	1.11.1.6	2 H2O2_[cyt] => Oxygen_[cyt] + 2 H2O_[cyt]	R00009	2 C00027_[cyt] => C00007_[cyt] + 2 C00001_[cyt]	General	A
R158	slr1171	1.11.1.9	H2O2_[cyt] + 2 Glutathione_[cyt] => Glutathione disulfide_[cyt] + 2 H2O_[cyt]	R00274	C00027_[cyt] + 2 C00051_[cyt] => C00127_[cyt] + 2 C00001_[cyt]	General	A	glutathione peroxidase
R159	slr1992	1.11.1.9	H2O2_[cyt] + 2 Glutathione_[cyt] => Glutathione disulfide_[cyt] + 2 H2O_[cyt]	R00274	C00027_[cyt] + 2 C00051_[cyt] => C00127_[cyt] + 2 C00001_[cyt]	General	A	glutathione peroxidase
R160	slr0600, slr1562, ssr2061	-	2 Glutathione_[cyt] + NADP+_[cyt] <=> Glutathione disulfide_[cyt] + NADPH_[cyt] + H+_[cyt]	R00115	2 C00051_[cyt] + C00006_[cyt] <=> C00127_[cyt] + C00005_[cyt] + C00080_[cyt]	General	B	Marteyn et al. 2009
R161	-	-	NH4+_[cyt] <=> NH3_[cyt] + H+_[cyt]	-	C01342_[cyt] <=> C00014_[cyt] + C00080_[cyt]	General	A	spontaneous
R162	sll1973, slr1510, sll1848	-	1.2759 sn-Glycerol 3-phosphate_[cyt] + 1.3302 Hexadecanoyl-[acp]_[cyt] + 0.0774 Hexadecenoyl-[acp]_[cyt] + 0.0034 Octadecanoyl-[acp]_[cyt] + 0.0635 Oleoyl-[acyl-carrier protein_[cyt] + 0.4236 Linoleoyl-[acp]_[cyt] + 0.6315 gamma-Linolenoyl-[acp]_[cyt] + 0.0032 alpha-Linolenoyl-[acp]_[cyt] + 0.0190 Stearidonoyl-[acp]_[cyt] => Phosphatidate_MGDG_[cyt] + 2.5518 Acyl-carrier protein_[cyt]	-	1.2759 C00093_[cyt] + 1.3302 C05764_[cyt] + 0.0774 C16520_[cyt] + 0.0034 C04088_[cyt] + 0.0635 C01203_[cyt] + 0.4236 C16160_[cyt] + 0.6315 E17_[cyt] + 0.0032 C16161_[cyt] + 0.0190 E36_[cyt] => C00416_MGDG_[cyt] + 2.5518 C00229_[cyt]	Glycerolipid	-	combined reaction of 2.3.1.15 and 2.3.1.51
R163	sll1973, slr1510, sll1848	-	1.2954 sn-Glycerol 3-phosphate_[cyt] + 1.3061 Hexadecanoyl-[acp]_[cyt] + 0.0965 Hexadecenoyl-[acp]_[cyt] + 0.0223 Octadecanoyl-[acp]_[cyt] + 0.0584 Oleoyl-[acyl-carrier protein_[cyt] + 0.3334 Linoleoyl-[acp]_[cyt] + 0.7253 gamma-Linolenoyl-[acp]_[cyt] + 0.0095 alpha-Linolenoyl-[acp]_[cyt] + 0.0393 Stearidonoyl-[acp]_[cyt] => Phosphatidate_DGDG_[cyt] + 2.5908 Acyl-carrier protein_[cyt]	-	1.2954 C00093_[cyt] + 1.3061 C05764_[cyt] + 0.0965 C16520_[cyt] + 0.0223 C04088_[cyt] + 0.0584 C01203_[cyt] + 0.3334 C16160_[cyt] + 0.7253 E17_[cyt] + 0.0095 C16161_[cyt] + 0.0393 E36_[cyt] => C00416_DGDG_[cyt] + 2.5908 C00229_[cyt]	Glycerolipid	-	combined reaction of 2.3.1.15 and 2.3.1.51
R164	sll1973, slr1510, sll1848	-	1.3747 sn-Glycerol 3-phosphate_[cyt] + 1.5612 Hexadecanoyl-[acp]_[cyt] + 0.1804 Hexadecenoyl-[acp]_[cyt] + 0.0434 Octadecanoyl-[acp]_[cyt] + 0.4011 Oleoyl-[acyl-carrier protein_[cyt] + 0.5331 Linoleoyl-[acp]_[cyt] + 0.0228 gamma-Linolenoyl-[acp]_[cyt] + 0.0165 alpha-Linolenoyl-[acp]_[cyt] => Phosphatidate_SQDG_[cyt] + 2.7494 Acyl-carrier protein_[cyt]	-	1.3747 C00093_[cyt] + 1.5612 C05764_[cyt] + 0.1804 C16520_[cyt] + 0.0343 C04088_[cyt] + 0.4011 C01203_[cyt] + 0.5331 C16160_[cyt] + 0.0228 E17_[cyt] + 0.0165 C16161_[cyt] => C00416_SQDG_[cyt] + 2.7494 C00229_[cyt]	Glycerolipid	-	combined reaction of 2.3.1.15 and 2.3.1.51
R165	sll1973, slr1510, sll1848	-	1.32535 sn-Glycerol 3-phosphate_[cyt] + 1.3327 Hexadecanoyl-[acp]_[cyt] + 0.0227 Hexadecenoyl-[acp]_[cyt] + 0.0457 Octadecanoyl-[acp]_[cyt] + 0.1701 Oleoyl-[acyl-carrier protein_[cyt] + 0.8637 Linoleoyl-[acp]_[cyt] + 0.2158 gamma-Linolenoyl-[acp]_[cyt] => Phosphatidate_PG_[cyt] + 2.6507 Acyl-carrier protein_[cyt]	-	1.32535 C00093_[cyt] + 1.3327 C05764_[cyt] + 0.0227 C16520_[cyt] + 0.0457 C04088_[cyt] + 0.1701 C01203_[cyt] + 0.8637 C16160_[cyt] + 0.2158 E17_[cyt] => C00416_PG_[cyt] + 2.6507 C00229_[cyt]	Glycerolipid	-	combined reaction of 2.3.1.15 and 2.3.1.51
R166	sll0545	3.1.3.4	Phosphatidate_MGDG_[cyt] + H2O_[cyt] => 1,2-Diacyl-sn-glycerol_MGDG_[cyt] + Orthophosphate_[cyt]	R02239	C00416_MGDG_[cyt] + C00001_[cyt] => C00641_MGDG_[cyt] + C00009_[cyt]	Glycerolipid	B	Nakamura et al. 2007
R167	sll0545	3.1.3.4	Phosphatidate_DGDG_[cyt] + H2O_[cyt] => 1,2-Diacyl-sn-glycerol_DGDG_[cyt] + Orthophosphate_[cyt]	R02239	C00416_DGDG_[cyt] + C00001_[cyt] => C00641_DGDG_[cyt] + C00009_[cyt]	Glycerolipid	B	Nakamura et al, 2007
R168	sll0545	3.1.3.4	Phosphatidate_SQDG_[cyt] + H2O_[cyt] => 1,2-Diacyl-sn-glycerol_SQDG_[cyt] + Orthophosphate_[cyt]	R02239	C00416_SQDG_[cyt] + C00001_[cyt] => C00641_SQDG_[cyt] + C00009_[cyt]	Glycerolipid	B	Nakamura et al, 2007
R169	slr0054	2.7.1.107	ATP_[cyt] + 1,2-Diacyl-sn-glycerol_MGDG_[cyt] => ADP_[cyt] + Phosphatidate_MGDG_[cyt]	R02240	C00002_[cyt] + C00641_MGDG_[cyt] => C00008_[cyt] + C00416_MGDG_[cyt]	Glycerolipid	A
R170	slr0054	2.7.1.107	ATP_[cyt] + 1,2-Diacyl-sn-glycerol_DGDG_[cyt] => ADP_[cyt] + Phosphatidate_DGDG_[cyt]	R02240	C00002_[cyt] + C00641_DGDG_[cyt] => C00008_[cyt] + C00416_DGDG_[cyt]	Glycerolipid	A
R171	slr0054	2.7.1.107	ATP_[cyt] + 1,2-Diacyl-sn-glycerol_SQDG_[cyt] => ADP_[cyt] + Phosphatidate_SQDG_[cyt]	R02240	C00002_[cyt] + C00641_SQDG_[cyt] => C00008_[cyt] + C00416_SQDG_[cyt]	Glycerolipid	A
R172	slr1369	2.7.7.41	CTP_[cyt] + Phosphatidate_PG_[cyt] => Diphosphate_[cyt] + CDP-diacylglycerol_PG_[cyt]	R01799	C00063_[cyt] + C00416_PG_[cyt] => C00013_[cyt] + C00269_PG_[cyt]	Glycerolipid	A
R173	sll1522	2.7.8.5	CDP-diacylglycerol_PG_[cyt] + sn-Glycerol 3-phosphate_[cyt] => CMP_[cyt] + Phosphatidylglycerophosphate_PG_[cyt]	R01801	C00269_PG_[cyt] + C00093_[cyt] => C00055_[cyt] + C03892_PG_[cyt]	Glycerolipid	A
R174	-	3.1.3.27	Phosphatidylglycerophosphate_PG_[cyt] + H2O_[cyt] => Phosphatidylglycerol_PG_[cyt] + Orthophosphate_[cyt]	R02029	C03892_PG_[cyt] + C00001_[cyt] => C00344_PG_[cyt] + C00009_[cyt]	Glycerolipid	E	no gene could be identified, needed for the synthesis of phosphatidylglycerol
R175	slr1020	3.13.1.1	UDP-glucose_[cyt] + Sulfite_[cyt] => UDP-6-sulfoquinovose_[cyt] + H2O_[cyt]	R05775	C00029_[cyt] + C00094_[cyt] => C11521_[cyt] + C00001_[cyt]	Glycerolipid	A
R176	slr0384	2.4.1.-	UDP-6-sulfoquinovose_[cyt] + 1,2-Diacyl-sn-glycerol_SQDG_[cyt] => Sulfoquinovosyldiacylglycerol_SQDG_[cyt] + UDP_[cyt]	R06867	C11521_[cyt] + C00641_SQDG_[cyt] => C13508_SQDG_[cyt] + C00015_[cyt]	Glycerolipid	B	Güler et al. 2000
R177	sll1377	2.4.1.157	UDP-glucose_[cyt] + 1,2-Diacyl-sn-glycerol_MGDG_[cyt] => UDP_[cyt] + 3-D-Glucosyl-1,2-diacylglycerol_MGDG_[cyt]	R02689	C00029_[cyt] + C00641_MGDG_[cyt] => C00015_[cyt] + C04046_MGDG_[cyt]	Glycerolipid	B	Awai et al. 2006
R178	sll1377	2.4.1.157	UDP-glucose_[cyt] + 1,2-Diacyl-sn-glycerol_DGDG_[cyt] => UDP_[cyt] + 3-D-Glucosyl-1,2-diacylglycerol_DGDG_[cyt]	R02689	C00029_[cyt] + C00641_DGDG_[cyt] => C00015_[cyt] + C04046_DGDG_[cyt]	Glycerolipid	B	Awai et al. 2006
R179	-	-	3-D-Glucosyl-1,2-diacylglycerol_MGDG_[cyt] <=> 1,2-Diacyl-3-beta-D-galactosyl-sn-glycerol_MGDG_[cyt]	-	C04046_MGDG_[cyt] <=> C03692_MGDG_[cyt]	Glycerolipid	E	unknown epimerase, Awai et al. 2006
R180	-	-	3-D-Glucosyl-1,2-diacylglycerol_DGDG_[cyt] <=> 1,2-Diacyl-3-beta-D-galactosyl-sn-glycerol_DGDG_[cyt]	-	C04046_DGDG_[cyt] <=> C03692_DGDG_[cyt]	Glycerolipid	E	unknown epimerase, Awai et al. 2006
R181	slr1508	2.4.1.184	2 1,2-Diacyl-3-beta-D-galactosyl-sn-glycerol_DGDG_[cyt] => Digalactosyl-diacylglycerol_DGDG_[cyt] + 1,2-Diacyl-sn-glycerol_DGDG_[cyt]	R04472	2 C03692_DGDG_[cyt] => C06037_DGDG_[cyt] + C00641_DGDG_[cyt]	Glycerolipid	B	Awai et al. 2007
R182	slr1348	2.3.1.30	L-Serine_[cyt] + Acetyl-CoA_[cyt] => O-Acetyl-L-serine_[cyt] + CoA_[cyt]	R00586	C00065_[cyt] + C00024_[cyt] => C00979_[cyt] + C00010_[cyt]	Cysteine, Glycine, Methionine and Serine	A
R183	sll0712	2.5.1.47	O-Acetyl-L-serine_[cyt] + Hydrogen sulfide_[cyt] => L-Cysteine_[cyt] + Acetate_[cyt]	R00897	C00979_[cyt] + C00283_[cyt] => C00097_[cyt] + C00033_[cyt]	Cysteine, Glycine, Methionine and Serine	A
R184	slr1842	2.5.1.47	O-Acetyl-L-serine_[cyt] + Hydrogen sulfide_[cyt] => L-Cysteine_[cyt] + Acetate_[cyt]	R00897	C00979_[cyt] + C00283_[cyt] => C00097_[cyt] + C00033_[cyt]	Cysteine, Glycine, Methionine and Serine	A
R185	slr1165	2.7.7.4	ATP_[cyt] + Sulfate_[cyt] => Diphosphate_[cyt] + Adenylyl sulfate_[cyt]	R00529	C00002_[cyt] + C00059_[cyt] => C00013_[cyt] + C00224_[cyt]	Cysteine, Glycine, Methionine and Serine	A
R186	slr0676	2.7.1.25	ATP_[cyt] + Adenylyl sulfate_[cyt] => ADP_[cyt] + 3'-Phosphoadenylyl sulfate_[cyt]	R00509	C00002_[cyt] + C00224_[cyt] => C00008_[cyt] + C00053_[cyt]	Cysteine, Glycine, Methionine and Serine	A
R187	slr1791	1.8.4.8	Thioredoxin_[cyt] + 3'-Phosphoadenylyl sulfate_[cyt] => Thioredoxin disulfide_[cyt] + Sulfite_[cyt] + Adenosine 3',5'-bisphosphate_[cyt]	R02021	C00342_[cyt] + C00053_[cyt] => C00343_[cyt] + C00094_[cyt] + C00054_[cyt]	Cysteine, Glycine, Methionine and Serine	A
R188	sll0895	3.1.3.7	Adenosine 3',5'-bisphosphate_[cyt] + H2O_[cyt] => AMP_[cyt] + Orthophosphate_[cyt]	R00188	C00054_[cyt] + C00001_[cyt] => C00020_[cyt] + C00009_[cyt]	Cysteine, Glycine, Methionine and Serine	D	sll0895 is coding for CysQ, which is annotated in many organisms for 3.1.3.7
R189	slr0963	1.8.7.1	Hydrogen sulfide_[cyt] + 6 Oxidized ferredoxin_[cyt] + 3 H2O_[cyt] <= Sulfite_[cyt] + 6 Reduced ferredoxin_[cyt] + 6 H+_[cyt]	R00859	C00283_[cyt] + 6 C00139_[cyt] + 3 C00001_[cyt] <= C00094_[cyt] + 6 C00138_[cyt] + 6 C00080_[cyt]	Cysteine, Glycine, Methionine and Serine	A
R190	slr2072	4.3.1.19	L-Serine_[cyt] => Pyruvate_[cyt] + NH3_[cyt]	R00220	C00065_[cyt] => C00022_[cyt] + C00014_[cyt]	Cysteine, Glycine, Methionine and Serine	A
R191	sll1931	2.1.2.1	5,10-Methylenetetrahydrofolate_[cyt] + Glycine_[cyt] + H2O_[cyt] <=> Tetrahydrofolate_[cyt] + L-Serine_[cyt]	R00945	C00143_[cyt] + C00037_[cyt] + C00001_[cyt] <=> C00101_[cyt] + C00065_[cyt]	Cysteine, Glycine, Methionine and Serine	A
R192	sll0171, slr0293, slr0879	2.1.2.10	Glycine_[cyt] + Tetrahydrofolate_[cyt] + NAD+_[cyt] => 5,10-Methylenetetrahydrofolate_[cyt] + NH3_[cyt] + CO2_[cyt] + NADH_[cyt] + H+_[cyt]	R01221	C00037_[cyt] + C00101_[cyt] + C00003_[cyt] => C00143_[cyt] + C00014_[cyt] + C00011_[cyt] + C00004_[cyt] + C00080_[cyt]	Cysteine, Glycine, Methionine and Serine	A
R193	slr0212	2.1.1.13	5-Methyltetrahydrofolate_[cyt] + L-Homocysteine_[cyt] => Tetrahydrofolate_[cyt] + L-Methionine_[cyt]	R00946	C00440_[cyt] + C00155_[cyt] => C00101_[cyt] + C00073_[cyt]	Cysteine, Glycine, Methionine and Serine	A
R194	sll1234	3.3.1.1	S-Adenosyl-L-homocysteine_[cyt] + H2O_[cyt] => Adenosine_[cyt] + L-Homocysteine_[cyt]	R00192	C00021_[cyt] + C00001_[cyt] => C00212_[cyt] + C00155_[cyt]	Cysteine, Glycine, Methionine and Serine	A
R195	slr0214	2.1.1.37	S-Adenosyl-L-methionine_[cyt] + DNA cytosine_[cyt] => S-Adenosyl-L-homocysteine_[cyt] + DNA 5-methylcytosine_[cyt]	R04858	C00019_[cyt] + C00856_[cyt] => C00021_[cyt] + C02967_[cyt]	Cysteine, Glycine, Methionine and Serine	A
R196	sll0927	2.5.1.6	Orthophosphate_[cyt] + Diphosphate_[cyt] + S-Adenosyl-L-methionine_[cyt] <= ATP_[cyt] + L-Methionine_[cyt] + H2O_[cyt]	R00177	C00009_[cyt] + C00013_[cyt] + C00019_[cyt] <= C00002_[cyt] + C00073_[cyt] + C00001_[cyt]	Cysteine, Glycine, Methionine and Serine	A
R197	sll1908	1.1.1.81	D-Glycerate_[cyt] + NADP+_[cyt] <=> Hydroxypyruvate_[cyt] + NADPH_[cyt] + H+_[cyt]	R01392	C00258_[cyt] + C00006_[cyt] <=> C00168_[cyt] + C00005_[cyt] + C00080_[cyt]	Cysteine, Glycine, Methionine and Serine	B	Eisenhut et al. 2008
R198	sll1559	2.6.1.45	L-Serine_[cyt] + Glyoxylate_[cyt] <=> Hydroxypyruvate_[cyt] + Glycine_[cyt]	R00588	C00065_[cyt] + C00048_[cyt] <=> C00168_[cyt] + C00037_[cyt]	Cysteine, Glycine, Methionine and Serine	A	Eisenhut et al. 2008, BLAST search: 70 % identity, 565 score and E-value e-162 to Serine-Glyoxylate transaminase from Trichodesmium erythraeum IMS101
R199	slr1840	2.7.1.165	ATP_[cyt] + D-Glycerate_[cyt] => ADP_[cyt] + 2-Phospho-D-glycerate_[cyt]	R08572	C00002_[cyt] + C00258_[cyt] => C00008_[cyt] + C00631_[cyt]	Cysteine, Glycine, Methionine and Serine	A	Eisenhut et al. 2008, Bartsch et al. 2008; BLAST search: 41.9 % identity, 201 score, E-value 3e-53 to glyerate kinase from Synechococcus sp. JA3-3Ab
R200	slr0229	1.1.1.60	D-Glycerate_[cyt] + NADP+_[cyt] <= Tartronate semialdehyde_[cyt] + NADPH_[cyt] + H+_[cyt]	R01747	C00258_[cyt] + C00006_[cyt] <= C01146_[cyt] + C00005_[cyt] + C00080_[cyt]	Cysteine, Glycine, Methionine and Serine	B	Eisenhut et al. 2008
R201	sll1981	4.1.1.47	2 Glyoxylate_[cyt] => Tartronate semialdehyde_[cyt] + CO2_[cyt]	R00013	2 C00048_[cyt] => C01146_[cyt] + C00011_[cyt]	Cysteine, Glycine, Methionine and Serine	B	Eisenhut et al. 2008
R202	sll1556	1.2.3.5	Glyoxylate_[cyt] + Oxygen_[cyt] + H2O_[cyt] => Oxalate_[cyt] + H2O2_[cyt]	R00466	C00048_[cyt] + C00007_[cyt] + C00001_[cyt] => C00209_[cyt] + C00027_[cyt]	Cysteine, Glycine, Methionine and Serine	B	Eisenhut et al. 2008
R203	sll0704	2.8.1.7	L-Cysteine_[cyt] + [enzyme]-cysteine_[cyt] => L-Alanine_[cyt] + [enzyme]-S-sulfanylcysteine_[cyt]	R07460	C15811_[cyt] + C00097_[cyt] => C15812_[cyt] + C00041_[cyt]	Cysteine, Glycine, Methionine and Serine	A
R204	slr0077	2.8.1.7	L-Cysteine_[cyt] + [enzyme]-cysteine_[cyt] => L-Alanine_[cyt] + [enzyme]-S-sulfanylcysteine_[cyt]	R07460	C15811_[cyt] + C00097_[cyt] => C15812_[cyt] + C00041_[cyt]	Cysteine, Glycine, Methionine and Serine	A
R205	slr0387	2.8.1.7	L-Cysteine_[cyt] + [enzyme]-cysteine_[cyt] => L-Alanine_[cyt] + [enzyme]-S-sulfanylcysteine_[cyt]	R07460	C15811_[cyt] + C00097_[cyt] => C15812_[cyt] + C00041_[cyt]	Cysteine, Glycine, Methionine and Serine	A
R206	sll0006	2.6.1.4	Glycine_[cyt] + 2-Oxoglutarate_[cyt] <=> Glyoxylate_[cyt] + L-Glutamate_[cyt]	R00372	C00037_[cyt] + C00026_[cyt] <=> C00048_[cyt] + C00025_[cyt]	Cysteine, Glycine, Methionine and Serine	B	Eisenhut et al. 2008
R207	-	2.3.1.31	Acetyl-CoA_[cyt] + L-Homoserine_[cyt] => CoA_[cyt] + O-Acetyl-L-homoserine_[cyt]	R01776	C00024_[cyt] + C00263_[cyt] => C00010_[cyt] + C01077_[cyt]	Cysteine, Glycine, Methionine and Serine	E	no pathway for the synthesis of methionine could been identified for Synechocystis sp. PCC6803; transferred pathyway from Microcystis aeruginosa
R208	-	2.5.1.49	O-Acetyl-L-homoserine_[cyt] + Hydrogen sulfide_[cyt] => L-Homocysteine_[cyt] + Acetate_[cyt]	R01287	C01077_[cyt] + C00283_[cyt] => C00155_[cyt] + C00033_[cyt]	Cysteine, Glycine, Methionine and Serine	E	no pathway for the synthesis of methionine could been identified for Synechocystis sp. PCC6803; transferred pathyway from Microcystis aeruginosa
R209	slr0633	1.4.3.19	Glycine_[cyt] + H2O_[cyt] + Oxygen_[cyt] => Glyoxylate_[cyt] + NH3_[cyt] + H2O2_[cyt]	R00366	C00037_[cyt] + C00001_[cyt] + C00007_[cyt] => C00048_[cyt] + C00014_[cyt] + C00027_[cyt]	Cysteine, Glycine, Methionine and Serine	C	BLAST search: identity 70.6 %, score 936, E-value 0.0 to glycine oxidase from Cyanothece sp. PCC 8801
R210	sll0895	3.1.3.7	3'-Phosphoadenylyl sulfate_[cyt] + H2O_[cyt] => Adenylyl sulfate_[cyt] + Orthophosphate_[cyt]	R00508	C00053_[cyt] + C00001_[cyt] => C00224_[cyt] + C00009_[cyt]	Cysteine, Glycine, Methionine and Serine	D	sll0895 is coding for CysQ, which is annotated in many organisms for 3.1.3.7
R211	sll1682	1.4.1.1	Glycine_[cyt] + H2O_[cyt] + NAD+_[cyt] <=> Glyoxylate_[cyt] + NH3_[cyt] + NADH_[cyt] + H+_[cyt]	R00365	C00037_[cyt] + C00001_[cyt] + C00003_[cyt] <=> C00048_[cyt] + C00014_[cyt] + C00004_[cyt] + C00080_[cyt]	Cysteine, Glycine, Methionine and Serine	A
R212	-	4.1.1.50	S-Adenosyl-L-methionine_[cyt] + H+_[cyt] => S-Adenosylmethioninamine_[cyt] + CO2_[cyt]	R00178	C00019_[cyt] + C00080_[cyt] => C01137_[cyt] + C00011_[cyt]	Cysteine, Glycine, Methionine and Serine	E	No genes could be identified; Jantaro et al. 2003
R213	slr0990	6.3.2.2	ATP_[cyt] + L-Glutamate_[cyt] + L-Cysteine_[cyt] => ADP_[cyt] + Orthophosphate_[cyt] + gamma-L-Glutamyl-L-cysteine_[cyt]	R00894	C00002_[cyt] + C00025_[cyt] + C00097_[cyt] => C00008_[cyt] + C00009_[cyt] + C00669_[cyt]	Glutathione	C	BLAST Search: 68 % identity, 540 score, E-value e-155 to glutamate-cysteine ligase from Cyanothece sp. PCC 8801
R214	slr1238	6.3.2.3	ATP_[cyt] + gamma-L-Glutamyl-L-cysteine_[cyt] + Glycine_[cyt] => ADP_[cyt] + Orthophosphate_[cyt] + Glutathione_[cyt]	R00497	C00002_[cyt] + C00669_[cyt] + C00037_[cyt] => C00008_[cyt] + C00009_[cyt] + C00051_[cyt]	Glutathione	A
R215	slr1269	2.3.2.2	Glutathione_[cyt] + H2O_[cyt] => Cys-Gly_[cyt] + L-Glutamate_[cyt]	R00494	C00051_[cyt] + C00001_[cyt] => C01419_[cyt] + C00025_[cyt]	Glutathione	A
R216	sll1343	3.4.11.2	Cys-Gly_[cyt] + H2O_[cyt] => L-Cysteine_[cyt] + Glycine_[cyt]	R00899	C01419_[cyt] + C00001_[cyt] => C00097_[cyt] + C00037_[cyt]	Glutathione	A
R217	sll2001	3.4.11.1	Cys-Gly_[cyt] + H2O_[cyt] => L-Cysteine_[cyt] + Glycine_[cyt]	R00899	C01419_[cyt] + C00001_[cyt] => C00097_[cyt] + C00037_[cyt]	Glutathione	A
R218	sll1908	1.1.1.95	3-Phospho-D-glycerate_[cyt] + NAD+_[cyt] <=> 3-Phosphonooxypyruvate_[cyt] + NADH_[cyt] + H+_[cyt]	R01513	C00197_[cyt] + C00003_[cyt] <=> C03232_[cyt] + C00004_[cyt] + C00080_[cyt]	Cysteine, Glycine, Methionine and Serine	A
R219	-	2.6.1.52	O-Phospho-L-serine_[cyt] + 2-Oxoglutarate_[cyt] <=> 3-Phosphonooxypyruvate_[cyt] + L-Glutamate_[cyt]	R04173	C01005_[cyt] + C00026_[cyt] <=> C03232_[cyt] + C00025_[cyt]	Cysteine, Glycine, Methionine and Serine	E	unknown transaminase
R220	slr1124	3.1.3.3	O-Phospho-L-serine_[cyt] + H2O_[cyt] => L-Serine_[cyt] + Orthophosphate_[cyt]	R00582	C01005_[cyt] + C00001_[cyt] => C00065_[cyt] + C00009_[cyt]	Cysteine, Glycine, Methionine and Serine	C,D	BLAST search: Identity 31 %, Score 102, E-value 2e-23 to PspA of Hydrogenobacter thermophilus PspA; Chiba et al. 2012
R221	sll0593	2.7.1.2	ATP_[cyt] + D-Glucose_[cyt] => ADP_[cyt] + D-Glucose 6-phosphate_[cyt]	R00299	C00002_[cyt] + C00031_[cyt] => C00008_[cyt] + C00092_[cyt]	Glycolysis and Sugar	A
R222	slr0329	2.7.1.2	ATP_[cyt] + D-Glucose_[cyt] => ADP_[cyt] + D-Glucose 6-phosphate_[cyt]	R00299	C00002_[cyt] + C00031_[cyt] => C00008_[cyt] + C00092_[cyt]	Glycolysis and Sugar	A
R223	slr1349	5.3.1.9	D-Glucose 6-phosphate_[cyt] <=> D-Fructose 6-phosphate_[cyt]	R00771	C00092_[cyt] <=> C00085_[cyt]	Glycolysis and Sugar	A
R224	slr0952	3.1.3.11	D-Fructose 1,6-bisphosphate_[cyt] + H2O_[cyt] => D-Fructose 6-phosphate_[cyt] + Orthophosphate_[cyt]	R00762	C00354_[cyt] + C00001_[cyt] => C00085_[cyt] + C00009_[cyt]	Glycolysis and Sugar	A
R225	slr2094	3.1.3.11	D-Fructose 1,6-bisphosphate_[cyt] + H2O_[cyt] => D-Fructose 6-phosphate_[cyt] + Orthophosphate_[cyt]	R00762	C00354_[cyt] + C00001_[cyt] => C00085_[cyt] + C00009_[cyt]	Glycolysis and Sugar	A
R226	sll0745	2.7.1.11	ATP_[cyt] + D-Fructose 6-phosphate_[cyt] => ADP_[cyt] + D-Fructose 1,6-bisphosphate_[cyt]	R00756	C00002_[cyt] + C00085_[cyt] => C00008_[cyt] + C00354_[cyt]	Glycolysis and Sugar	A
R227	sll1196	2.7.1.11	ATP_[cyt] + D-Fructose 6-phosphate_[cyt] => ADP_[cyt] + D-Fructose 1,6-bisphosphate_[cyt]	R00756	C00002_[cyt] + C00085_[cyt] => C00008_[cyt] + C00354_[cyt]	Glycolysis and Sugar	A
R228	sll0018	4.1.2.13	D-Fructose 1,6-bisphosphate_[cyt] <=> Glycerone phosphate_[cyt] + D-Glyceraldehyde 3-phosphate_[cyt]	R01068	C00354_[cyt] <=> C00111_[cyt] + C00118_[cyt]	Glycolysis and Sugar	A	Nakahara et al. 2003
R229	slr0943	4.1.2.13	D-Fructose 1,6-bisphosphate_[cyt] <=> Glycerone phosphate_[cyt] + D-Glyceraldehyde 3-phosphate_[cyt]	R01068	C00354_[cyt] <=> C00111_[cyt] + C00118_[cyt]	Glycolysis and Sugar	A	Nakahara et al. 2003
R230	slr0783	5.3.1.1	D-Glyceraldehyde 3-phosphate_[cyt] <=> Glycerone phosphate_[cyt]	R01015	C00118_[cyt] <=> C00111_[cyt]	Glycolysis and Sugar	A
R231	sll1342	1.2.1.59	D-Glyceraldehyde 3-phosphate_[cyt] + Orthophosphate_[cyt] + NADP+_[cyt] <= 3-Phospho-D-glyceroyl phosphate_[cyt] + NADPH_[cyt] + H+_[cyt]	R01063	C00118_[cyt] + C00009_[cyt] + C00006_[cyt] <= C00236_[cyt] + C00005_[cyt] + C00080_[cyt]	Glycolysis and Sugar	A
R232	slr0884	1.2.1.12	D-Glyceraldehyde 3-phosphate_[cyt] + Orthophosphate_[cyt] + NAD+_[cyt] => 3-Phospho-D-glyceroyl phosphate_[cyt] + NADH_[cyt] + H+_[cyt]	R01061	C00118_[cyt] + C00009_[cyt] + C00003_[cyt] => C00236_[cyt] + C00004_[cyt] + C00080_[cyt]	Glycolysis and Sugar	A
R233	slr0394	2.7.2.3	ATP_[cyt] + 3-Phospho-D-glycerate_[cyt] <=> ADP_[cyt] + 3-Phospho-D-glyceroyl phosphate_[cyt]	R01512	C00002_[cyt] + C00197_[cyt] <=> C00008_[cyt] + C00236_[cyt]	Glycolysis and Sugar	A
R234	slr1748	5.4.2.1	2-Phospho-D-glycerate_[cyt] <=> 3-Phospho-D-glycerate_[cyt]	R01518	C00631_[cyt] <=> C00197_[cyt]	Glycolysis and Sugar	A	BLAST search: identity 71%, score 331, E-value 9e-93 to Phosphoglycerate mutase from Cyanothece sp. PCC 7424
R235	slr1124	5.4.2.1	2-Phospho-D-glycerate_[cyt] <=> 3-Phospho-D-glycerate_[cyt]	R01518	C00631_[cyt] <=> C00197_[cyt]	Glycolysis and Sugar	A
R236	slr1945	5.4.2.1	2-Phospho-D-glycerate_[cyt] <=> 3-Phospho-D-glycerate_[cyt]	R01518	C00631_[cyt] <=> C00197_[cyt]	Glycolysis and Sugar	A
R237	sll0395	5.4.2.1	2-Phospho-D-glycerate_[cyt] <=> 3-Phospho-D-glycerate_[cyt]	R01518	C00631_[cyt] <=> C00197_[cyt]	Glycolysis and Sugar	A	Phosphoglycerate mutase
R238	slr0752	4.2.1.11	2-Phospho-D-glycerate_[cyt] <=> Phosphoenolpyruvate_[cyt] + H2O_[cyt]	R00658	C00631_[cyt] <=> C00074_[cyt] + C00001_[cyt]	Glycolysis and Sugar	A
R239	sll0726	5.4.2.2	D-Glucose 1-phosphate_[cyt] <=> D-Glucose 6-phosphate_[cyt]	R08639	C00103_[cyt] <=> C00092_[cyt]	Glycolysis and Sugar	A
R240	slr1448	2.7.1.4	ATP_[cyt] + D-Fructose_[cyt] <=> ADP_[cyt] + D-Fructose 6-phosphate_[cyt]	R00760	C00002_[cyt] + C00095_[cyt] <=> C00008_[cyt] + C00085_[cyt]	Glycolysis and Sugar	A
R241	slr0493	5.3.1.8	D-Mannose 6-phosphate_[cyt] <=> D-Fructose 6-phosphate_[cyt]	R00772	C00275_[cyt] <=> C00085_[cyt]	Glycolysis and Sugar	A
R242	sll1496	5.4.2.8	D-Mannose 6-phosphate_[cyt] <=> D-Mannose 1-phosphate_[cyt]	R01818	C00275_[cyt] <=> C00636_[cyt]	Glycolysis and Sugar	A
R243	slr1334	5.4.2.8	D-Mannose 6-phosphate_[cyt] <=> D-Mannose 1-phosphate_[cyt]	R01818	C00275_[cyt] <=> C00636_[cyt]	Glycolysis and Sugar	A
R244	sll1496	2.7.7.13	GTP_[cyt] + D-Mannose 1-phosphate_[cyt] => Diphosphate_[cyt] + GDP-mannose_[cyt]	R00885	C00044_[cyt] + C00636_[cyt] => C00013_[cyt] + C00096_[cyt]	Glycolysis and Sugar	A
R245	sll1558	2.7.7.13	GTP_[cyt] + D-Mannose 1-phosphate_[cyt] => Diphosphate_[cyt] + GDP-mannose_[cyt]	R00885	C00044_[cyt] + C00636_[cyt] => C00013_[cyt] + C00096_[cyt]	Glycolysis and Sugar	A
R246	sll1370	2.7.7.22	GDP_[cyt] + D-Mannose 1-phosphate_[cyt] => Orthophosphate_[cyt] + GDP-mannose_[cyt]	R00883	C00035_[cyt] + C00636_[cyt] => C00009_[cyt] + C00096_[cyt]	Glycolysis and Sugar	A
R247	slr2074	2.7.7.22	GDP_[cyt] + D-Mannose 1-phosphate_[cyt] => Orthophosphate_[cyt] + GDP-mannose_[cyt]	R00883	C00035_[cyt] + C00636_[cyt] => C00009_[cyt] + C00096_[cyt]	Glycolysis and Sugar	A
R248	sll0207	2.7.7.24	dTTP_[cyt] + D-Glucose 1-phosphate_[cyt] => Diphosphate_[cyt] + dTDP-glucose_[cyt]	R02328	C00459_[cyt] + C00103_[cyt] => C00013_[cyt] + C00842_[cyt]	Glycolysis and Sugar	A
R249	slr0983	2.7.7.33	CTP_[cyt] + D-Glucose 1-phosphate_[cyt] => Diphosphate_[cyt] + CDP-glucose_[cyt]	R00956	C00063_[cyt] + C00103_[cyt] => C00013_[cyt] + C00501_[cyt]	Glycolysis and Sugar	A
R250	sll0244	5.1.3.2	dTDP-glucose_[cyt] <=> dTDP-galactose_[cyt]	R02984	C00842_[cyt] <=> C02097_[cyt]	Glycolysis and Sugar	A
R251	slr1067	5.1.3.2	dTDP-glucose_[cyt] <=> dTDP-galactose_[cyt]	R02984	C00842_[cyt] <=> C02097_[cyt]	Glycolysis and Sugar	A
R252	slr1078	5.1.3.2	dTDP-glucose_[cyt] <=> dTDP-galactose_[cyt]	R02984	C00842_[cyt] <=> C02097_[cyt]	Glycolysis and Sugar	A
R253	slr0809	4.2.1.46	dTDP-glucose_[cyt] => 4,6-Dideoxy-4-oxo-dTDP-D-glucose_[cyt] + H2O_[cyt]	R06513	C00842_[cyt] => C11907_[cyt] + C00001_[cyt]	Glycolysis and Sugar	A
R254	slr0836	4.2.1.46	dTDP-glucose_[cyt] => 4,6-Dideoxy-4-oxo-dTDP-D-glucose_[cyt] + H2O_[cyt]	R06513	C00842_[cyt] => C11907_[cyt] + C00001_[cyt]	Glycolysis and Sugar	A
R255	slr0985	5.1.3.13	4,6-Dideoxy-4-oxo-dTDP-D-glucose_[cyt] => dTDP-4-dehydro-6-deoxy-L-mannose_[cyt]	R06514	C11907_[cyt] => C00688_[cyt]	Glycolysis and Sugar	A
R256	slr1933	5.1.3.13	4,6-Dideoxy-4-oxo-dTDP-D-glucose_[cyt] => dTDP-4-dehydro-6-deoxy-L-mannose_[cyt]	R06514	C11907_[cyt] => C00688_[cyt]	Glycolysis and Sugar	A
R257	sll1395	1.1.1.133	dTDP-6-deoxy-L-mannose_[cyt] + NADP+_[cyt] <= dTDP-4-dehydro-6-deoxy-L-mannose_[cyt] + NADPH_[cyt] + H+_[cyt]	R02777	C03319_[cyt] + C00006_[cyt] <= C00688_[cyt] + C00005_[cyt] + C00080_[cyt]	Glycolysis and Sugar	A
R258	-	2.7.7.9	UTP_[cyt] + D-Glucose 1-phosphate_[cyt] <=> Diphosphate_[cyt] + UDP-glucose_[cyt]	R00289	C00075_[cyt] + C00103_[cyt] <=> C00013_[cyt] + C00029_[cyt]	Glycolysis and Sugar	E	no gene could be identified for UDP-glucose phosphorylase (2.7.7.9.)
R259	sll0244	5.1.3.2	UDP-glucose_[cyt] <=> UDP-D-galactose_[cyt]	R00291	C00029_[cyt] <=> C00052_[cyt]	Glycolysis and Sugar	A
R260	slr0091	1.2.1.3	D-Glyceraldehyde_[cyt] + NAD+_[cyt] + H2O_[cyt] <=> D-Glycerate_[cyt] + NADH_[cyt] + H+_[cyt]	R01752	C00577_[cyt] + C00003_[cyt] + C00001_[cyt] <=> C00258_[cyt] + C00004_[cyt] + C00080_[cyt]	Glycolysis and Sugar	A
R261	slr0942	1.1.1.2	Glycerol_[cyt] + NADP+_[cyt] <=> D-Glyceraldehyde_[cyt] + NADPH_[cyt] + H+_[cyt]	R01041	C00116_[cyt] + C00006_[cyt] <=> C00577_[cyt] + C00005_[cyt] + C00080_[cyt]	Glycolysis and Sugar	A
R262	slr1672	2.7.1.30	ATP_[cyt] + Glycerol_[cyt] => ADP_[cyt] + sn-Glycerol 3-phosphate_[cyt]	R00847	C00002_[cyt] + C00116_[cyt] => C00008_[cyt] + C00093_[cyt]	Glycolysis and Sugar	A
R263	slr1755	1.1.1.94	sn-Glycerol 3-phosphate_[cyt] + NAD+_[cyt] <=> Glycerone phosphate_[cyt] + NADH_[cyt] + H+_[cyt]	R00842	C00093_[cyt] + C00003_[cyt] <=> C00111_[cyt] + C00004_[cyt] + C00080_[cyt]	Glycolysis and Sugar	A
R264	sll1085	1.1.5.3	sn-Glycerol 3-phosphate_[cyt] + PQ_[tlm] => Glycerone phosphate_[cyt] + PQH2_[tlm]	-	C00093_[cyt] + C10385_[tlm] => C00111_[cyt] + C16695_[tlm]	Glycolysis and Sugar	A
R265	sll1085	1.1.5.3	sn-Glycerol 3-phosphate_[cyt] + PQ_[cym] => Glycerone phosphate_[cyt] + PQH2_[cym]	-	C00093_[cyt] + C10385_[cym] => C00111_[cyt] + C16695_[cym]	Glycolysis and Sugar	A
R266	sll0045	2.4.1.14	UDP-glucose_[cyt] + D-Fructose 6-phosphate_[cyt] => UDP_[cyt] + Sucrose 6'-phosphate_[cyt]	R00766	C00029_[cyt] + C00085_[cyt] => C00015_[cyt] + C02591_[cyt]	Glycolysis and Sugar	A
R267	slr0953	3.1.3.24	Sucrose 6'-phosphate_[cyt] + H2O_[cyt] => Sucrose_[cyt] + Orthophosphate_[cyt]	R00805	C02591_[cyt] + C00001_[cyt] => C00089_[cyt] + C00009_[cyt]	Glycolysis and Sugar	B	Lunn 2002
R268	slr0839	4.99.1.1	Protoporphyrin_[cyt] + Fe2+_[cyt] => Heme_[cyt] + 2 H+_[cyt]	R00310	C02191_[cyt] + C14818_[cyt] => C00032_[cyt] + 2 C00080_[cyt]	Heme	A
R269	sll1899	2.5.1.-	Heme_[cyt] + H2O_[cyt] + trans,trans-Farnesyl diphosphate_[cyt] <=> Heme O_[cyt] + Diphosphate_[cyt]	R07411	C00032_[cyt] + C00001_[cyt] + C00448_[cyt] <=> C15672_[cyt] + C00013_[cyt]	Heme	A
R270	sll1898	-	Heme O_[cyt] + H2O_[cyt] <=> Heme A_[cyt] + 4 H+_[cyt]	R07412	C15672_[cyt] + C00001_[cyt] <=> C15670_[cyt] + 4 C00080_[cyt]	Heme	A
R271	sll0900, slr1560	2.4.2.17	1-(5-Phospho-D-ribosyl)-ATP_[cyt] + Diphosphate_[cyt] <= ATP_[cyt] + 5-Phospho-alpha-D-ribose 1-diphosphate_[cyt]	R01071	C02739_[cyt] + C00013_[cyt] <= C00002_[cyt] + C00119_[cyt]	Histidine	A
R272	slr0608	3.6.1.31	1-(5-Phospho-D-ribosyl)-ATP_[cyt] + H2O_[cyt] => Phosphoribosyl-AMP_[cyt] + Diphosphate_[cyt]	R04035	C02739_[cyt] + C00001_[cyt] => C02741_[cyt] + C00013_[cyt]	Histidine	A
R273	slr0608	3.5.4.19	Phosphoribosyl-AMP_[cyt] + H2O_[cyt] => 5-(5-Phospho-D-ribosylaminoformimino)-1-(5-phosphoribosyl)- imidazole-4-carboxamide_[cyt]	R04037	C02741_[cyt] + C00001_[cyt] => C04896_[cyt]	Histidine	A
R274	slr0652	5.3.1.16	5-(5-Phospho-D-ribosylaminoformimino)-1-(5-phosphoribosyl)- imidazole-4-carboxamide_[cyt] => N-(5'-Phospho-D-1'-ribulosylformimino)-5-amino-1-(5''-phospho-D- ribosyl)-4-imidazolecarboxamide_[cyt]	R04640	C04896_[cyt] => C04916_[cyt]	Histidine	A
R275	sll1893	4.1.3.-	N-(5'-Phospho-D-1'-ribulosylformimino)-5-amino-1-(5''-phospho-D- ribosyl)-4-imidazolecarboxamide_[cyt] + L-Glutamine_[cyt] => D-erythro-1-(Imidazol-4-yl)glycerol 3-phosphate_[cyt] + 1-(5'-Phosphoribosyl)-5-amino-4-imidazolecarboxamide_[cyt] + L-Glutamate_	R04558	C04916_[cyt] + C00064_[cyt] => C04666_[cyt] + C04677_[cyt] + C00025_[cyt]	Histidine	A
R276	slr0084	2.4.2.-	N-(5'-Phospho-D-1'-ribulosylformimino)-5-amino-1-(5''-phospho-D- ribosyl)-4-imidazolecarboxamide_[cyt] + L-Glutamine_[cyt] => D-erythro-1-(Imidazol-4-yl)glycerol 3-phosphate_[cyt] + 1-(5'-Phosphoribosyl)-5-amino-4-imidazolecarboxamide_[cyt] + L-Glutamate_	R04558	C04916_[cyt] + C00064_[cyt] => C04666_[cyt] + C04677_[cyt] + C00025_[cyt]	Histidine	A
R277	slr0500	4.2.1.19	D-erythro-1-(Imidazol-4-yl)glycerol 3-phosphate_[cyt] => 3-(Imidazol-4-yl)-2-oxopropyl phosphate_[cyt] + H2O_[cyt]	R03457	C04666_[cyt] => C01267_[cyt] + C00001_[cyt]	Histidine	A
R278	sll1958	2.6.1.9	L-Histidinol phosphate_[cyt] + 2-Oxoglutarate_[cyt] <=> 3-(Imidazol-4-yl)-2-oxopropyl phosphate_[cyt] + L-Glutamate_[cyt]	R03243	C01100_[cyt] + C00026_[cyt] <=> C01267_[cyt] + C00025_[cyt]	Histidine	A
R279	sll0084	3.1.3.15	L-Histidinol phosphate_[cyt] + H2O_[cyt] => L-Histidinol_[cyt] + Orthophosphate_[cyt]	R03013	C01100_[cyt] + C00001_[cyt] => C00860_[cyt] + C00009_[cyt]	Histidine	C	BLAST search: 56 % identity, 189 score and E-value e-49 to hisB from Cyanothece sp. ATCC 51142
R280	slr0682	1.1.1.23	L-Histidinol_[cyt] + NAD+_[cyt] => L-Histidinal_[cyt] + NADH_[cyt] + H+_[cyt]	R03012	C00860_[cyt] + C00003_[cyt] => C01929_[cyt] + C00004_[cyt] + C00080_[cyt]	Histidine	A
R281	slr1848	1.1.1.23	L-Histidinol_[cyt] + NAD+_[cyt] => L-Histidinal_[cyt] + NADH_[cyt] + H+_[cyt]	R03012	C00860_[cyt] + C00003_[cyt] => C01929_[cyt] + C00004_[cyt] + C00080_[cyt]	Histidine	A
R282	slr0682	1.1.1.23	L-Histidinal_[cyt] + H2O_[cyt] + NAD+_[cyt] => L-Histidine_[cyt] + NADH_[cyt] + H+_[cyt]	R01163	C01929_[cyt] + C00001_[cyt] + C00003_[cyt] => C00135_[cyt] + C00004_[cyt] + C00080_[cyt]	Histidine	A
R283	slr1848	1.1.1.23	L-Histidinal_[cyt] + H2O_[cyt] + NAD+_[cyt] => L-Histidine_[cyt] + NADH_[cyt] + H+_[cyt]	R01163	C01929_[cyt] + C00001_[cyt] + C00003_[cyt] => C00135_[cyt] + C00004_[cyt] + C00080_[cyt]	Histidine	A
R284	sll0065, sll1981, slr2088	2.2.1.6	Pyruvate_[cyt] + Thiamin diphosphate_[cyt] => 2-(alpha-Hydroxyethyl)thiamine diphosphate_[cyt] + CO2_[cyt]	R00014	C00022_[cyt] + C00068_[cyt] => C05125_[cyt] + C00011_[cyt]	Isoleucine, Leucine and Valine	A
R285	sll0065, sll1981, slr2088	2.2.1.6	2-Acetolactate_[cyt] + Thiamin diphosphate_[cyt] <= 2-(alpha-Hydroxyethyl)thiamine diphosphate_[cyt] + Pyruvate_[cyt]	R03050	C00900_[cyt] + C00068_[cyt] <= C05125_[cyt] + C00022_[cyt]	Isoleucine, Leucine and Valine	A
R286	sll0065, sll1981, slr2088	2.2.1.6	2-Oxobutanoate_[cyt] + 2-(alpha-Hydroxyethyl)thiamine diphosphate_[cyt] => (S)-2-Aceto-2-hydroxybutanoate_[cyt] + Thiamin diphosphate_[cyt]	R04673	C00109_[cyt] + C05125_[cyt] => C06006_[cyt] + C00068_[cyt]	Isoleucine, Leucine and Valine	A
R287	sll1363	1.1.1.86	2-Acetolactate_[cyt] + NADPH_[cyt] + H+_[cyt] => 2,3-Dihydroxy-3-methylbutanoate_[cyt] + NADP+_[cyt]	R03051	C00900_[cyt] + C00005_[cyt] + C00080_[cyt] => C04039_[cyt] + C00006_[cyt]	Isoleucine, Leucine and Valine	A
R288	sll1363	1.1.1.86	(S)-2-Aceto-2-hydroxybutanoate_[cyt] => (R)-3-Hydroxy-3-methyl-2-oxopentanoate_[cyt]	R05069	C06006_[cyt] => C14463_[cyt]	Isoleucine, Leucine and Valine	A
R289	sll1363	1.1.1.86	(R)-2,3-Dihydroxy-3-methylpentanoate_[cyt] + NADP+_[cyt] <= (R)-3-Hydroxy-3-methyl-2-oxopentanoate_[cyt] + NADPH_[cyt] + H+_[cyt]	R05068	C06007_[cyt] + C00006_[cyt] <= C14463_[cyt] + C00005_[cyt] + C00080_[cyt]	Isoleucine, Leucine and Valine	A
R290	slr0452	4.2.1.9	2,3-Dihydroxy-3-methylbutanoate_[cyt] => 3-Methyl-2-oxobutanoic acid_[cyt] + H2O_[cyt]	R01209	C04039_[cyt] => C00141_[cyt] + C00001_[cyt]	Isoleucine, Leucine and Valine	A
R291	slr0452	4.2.1.9	(R)-2,3-Dihydroxy-3-methylpentanoate_[cyt] => (S)-3-Methyl-2-oxopentanoic acid_[cyt] + H2O_[cyt]	R05070	C06007_[cyt] => C00671_[cyt] + C00001_[cyt]	Isoleucine, Leucine and Valine	A
R292	slr0032	2.6.1.42	L-Leucine_[cyt] + 2-Oxoglutarate_[cyt] <=> 4-Methyl-2-oxopentanoate_[cyt] + L-Glutamate_[cyt]	R01090	C00123_[cyt] + C00026_[cyt] <=> C00233_[cyt] + C00025_[cyt]	Isoleucine, Leucine and Valine	A
R293	slr0032	2.6.1.42	L-Valine_[cyt] + 2-Oxoglutarate_[cyt] <=> 3-Methyl-2-oxobutanoic acid_[cyt] + L-Glutamate_[cyt]	R01214	C00183_[cyt] + C00026_[cyt] <=> C00141_[cyt] + C00025_[cyt]	Isoleucine, Leucine and Valine	A
R294	slr0032	2.6.1.42	L-Isoleucine_[cyt] + 2-Oxoglutarate_[cyt] <=> (S)-3-Methyl-2-oxopentanoic acid_[cyt] + L-Glutamate_[cyt]	R02199	C00407_[cyt] + C00026_[cyt] <=> C00671_[cyt] + C00025_[cyt]	Isoleucine, Leucine and Valine	A
R295	sll1564	2.3.3.13	(2S)-2-Isopropylmalate_[cyt] + CoA_[cyt] <= Acetyl-CoA_[cyt] + 3-Methyl-2-oxobutanoic acid_[cyt] + H2O_[cyt]	R01213	C02504_[cyt] + C00010_[cyt] <= C00024_[cyt] + C00141_[cyt] + C00001_[cyt]	Isoleucine, Leucine and Valine	A
R296	slr0186	2.3.3.13	(2S)-2-Isopropylmalate_[cyt] + CoA_[cyt] <= Acetyl-CoA_[cyt] + 3-Methyl-2-oxobutanoic acid_[cyt] + H2O_[cyt]	R01213	C02504_[cyt] + C00010_[cyt] <= C00024_[cyt] + C00141_[cyt] + C00001_[cyt]	Isoleucine, Leucine and Valine	A
R297	sll1444, sll1470	4.2.1.33	(2S)-2-Isopropylmalate_[cyt] => 2-Isopropylmaleate_[cyt] + H2O_[cyt]	R03968	C02504_[cyt] => C02631_[cyt] + C00001_[cyt]	Isoleucine, Leucine and Valine	A
R298	sll1444, sll1470	4.2.1.33	(2R,3S)-3-Isopropylmalate_[cyt] <= 2-Isopropylmaleate_[cyt] + H2O_[cyt]	R04001	C04411_[cyt] <= C02631_[cyt] + C00001_[cyt]	Isoleucine, Leucine and Valine	A
R299	slr1517	1.1.1.85	(2R,3S)-3-Isopropylmalate_[cyt] + NAD+_[cyt] => (2S)-2-Isopropyl-3-oxosuccinate_[cyt] + NADH_[cyt] + H+_[cyt]	R04426	C04411_[cyt] + C00003_[cyt] => C04236_[cyt] + C00004_[cyt] + C00080_[cyt]	Isoleucine, Leucine and Valine	A
R300	-	-	4-Methyl-2-oxopentanoate_[cyt] + CO2_[cyt] <= (2S)-2-Isopropyl-3-oxosuccinate_[cyt]	R01652	C00233_[cyt] + C00011_[cyt] <= C04236_[cyt]	Isoleucine, Leucine and Valine	A
R301	sll1564 or slr0186	2.3.1.182	Acetyl-CoA_[cyt] + Pyruvate_[cyt] + H2O_[cyt] => (R)-2-Methylmalate_[cyt] + CoA_[cyt]	R07399	C00024_[cyt] + C00022_[cyt] + C00001_[cyt] => C02612_[cyt] + C00010_[cyt]	Isoleucine, Leucine and Valine	B	Wu et al. 2010
R302	sll1444, sll1470	4.2.1.35	(R)-2-Methylmalate_[cyt] <=> 2-Methylmaleate_[cyt] + H2O_[cyt]	R03896	C02612_[cyt] <=> C02226_[cyt] + C00001_[cyt]	Isoleucine, Leucine and Valine	A
R303	sll1444, sll1470	-	2-Methylmaleate_[cyt] + H2O_[cyt] <=> D-erythro-3-Methylmalate_[cyt]	R03898	C02226_[cyt] + C00001_[cyt] <=> C06032_[cyt]	Isoleucine, Leucine and Valine	A
R304	slr1517	1.1.1.85	2-Oxobutanoate_[cyt] + CO2_[cyt] + NADH_[cyt] + H+_[cyt] <= D-erythro-3-Methylmalate_[cyt] + NAD+_[cyt]	R00994	C00109_[cyt] + C00011_[cyt] + C00004_[cyt] + C00080_[cyt] <= C06032_[cyt] + C00003_[cyt]	Isoleucine, Leucine and Valine	A
R305	sll1722	5.5.1.4	D-Glucose 6-phosphate_[cyt] => 1D-myo-Inositol 3-phosphate_[cyt]	R07324	C00092_[cyt] => C04006_[cyt]	Inositol	B	Chatterje et al. 2004
R306	sll1981	5.5.1.4	D-Glucose 6-phosphate_[cyt] => 1D-myo-Inositol 3-phosphate_[cyt]	R07324	C00092_[cyt] => C04006_[cyt]	Inositol	B	Chatterje et al. 2006
R307	sll1329	3.1.3.25	1D-myo-Inositol 3-phosphate_[cyt] + H2O_[cyt] => myo-Inositol_[cyt] + Orthophosphate_[cyt]	R01187	C04006_[cyt] + C00001_[cyt] => C00137_[cyt] + C00009_[cyt]	Inositol	A
R308	sll1383	3.1.3.25	1D-myo-Inositol 3-phosphate_[cyt] + H2O_[cyt] => myo-Inositol_[cyt] + Orthophosphate_[cyt]	R01187	C04006_[cyt] + C00001_[cyt] => C00137_[cyt] + C00009_[cyt]	Inositol	A	Patra et al. 2006
R309	sll1959	3.1.3.25	1D-myo-Inositol 3-phosphate_[cyt] + H2O_[cyt] => myo-Inositol_[cyt] + Orthophosphate_[cyt]	R01187	C04006_[cyt] + C00001_[cyt] => C00137_[cyt] + C00009_[cyt]	Inositol	B	Patra et al. 2006
R310	slr1511	2.3.1.180	Acetyl-CoA_[cyt] + Acyl-carrier protein_[cyt] => CoA_[cyt] + Acetyl-[acp]_[cyt]	R01624	C00024_[cyt] + C00229_[cyt] => C00010_[cyt] + C03939_[cyt]	Lipid	A
R311	slr1332	2.3.1.179	Acetyl-[acp]_[cyt] + Malonyl-[acp]_[cyt] => Acetoacetyl-[acp]_[cyt] + CO2_[cyt] + Acyl-carrier protein_[cyt]	R04355	C03939_[cyt] + C01209_[cyt] => C05744_[cyt] + C00011_[cyt] + C00229_[cyt]	Lipid	A
R312	slr1511	2.3.1.180	Acetyl-[acp]_[cyt] + Malonyl-[acp]_[cyt] => Acetoacetyl-[acp]_[cyt] + CO2_[cyt] + Acyl-carrier protein_[cyt]	R04355	C03939_[cyt] + C01209_[cyt] => C05744_[cyt] + C00011_[cyt] + C00229_[cyt]	Lipid	A
R313	sll1069	2.3.1.179	Acetyl-[acp]_[cyt] + Malonyl-[acp]_[cyt] => Acetoacetyl-[acp]_[cyt] + CO2_[cyt] + Acyl-carrier protein_[cyt]	R04355	C03939_[cyt] + C01209_[cyt] => C05744_[cyt] + C00011_[cyt] + C00229_[cyt]	Lipid	A
R314	sll0053, sll0336, sll0728, slr0435	6.4.1.2	ATP_[cyt] + Acetyl-CoA_[cyt] + HCO3-_[cyt] + H+_[cyt] => ADP_[cyt] + Orthophosphate_[cyt] + Malonyl-CoA_[cyt]	R00742	C00002_[cyt] + C00024_[cyt] + C00288_[cyt] + C00080_[cyt] => C00008_[cyt] + C00009_[cyt] + C00083_[cyt]	Lipid	A
R315	slr2023	2.3.1.39	Malonyl-CoA_[cyt] + Acyl-carrier protein_[cyt] => CoA_[cyt] + Malonyl-[acp]_[cyt]	R01626	C00083_[cyt] + C00229_[cyt] => C00010_[cyt] + C01209_[cyt]	Lipid	A
R316	sll1069	2.3.1.179	Butyryl-[acp]_[cyt] + Malonyl-[acp]_[cyt] => 3-Oxohexanoyl-[acp]_[cyt] + CO2_[cyt] + Acyl-carrier protein_[cyt]	R04952	C05745_[cyt] + C01209_[cyt] => C05746_[cyt] + C00011_[cyt] + C00229_[cyt]	Lipid	A
R317	slr1332	2.3.1.179	Butyryl-[acp]_[cyt] + Malonyl-[acp]_[cyt] => 3-Oxohexanoyl-[acp]_[cyt] + CO2_[cyt] + Acyl-carrier protein_[cyt]	R04952	C05745_[cyt] + C01209_[cyt] => C05746_[cyt] + C00011_[cyt] + C00229_[cyt]	Lipid	A
R318	sll1069	2.3.1.179	Hexanoyl-[acp]_[cyt] + Malonyl-[acp]_[cyt] => 3-Oxooctanoyl-[acp]_[cyt] + CO2_[cyt] + Acyl-carrier protein_[cyt]	R04957	C05749_[cyt] + C01209_[cyt] => C05750_[cyt] + C00011_[cyt] + C00229_[cyt]	Lipid	A
R319	slr1332	2.3.1.179	Hexanoyl-[acp]_[cyt] + Malonyl-[acp]_[cyt] => 3-Oxooctanoyl-[acp]_[cyt] + CO2_[cyt] + Acyl-carrier protein_[cyt]	R04957	C05749_[cyt] + C01209_[cyt] => C05750_[cyt] + C00011_[cyt] + C00229_[cyt]	Lipid	A
R320	sll1069	2.3.1.179	Octanoyl-[acp]_[cyt] + Malonyl-[acp]_[cyt] => 3-Oxodecanoyl-[acp]_[cyt] + CO2_[cyt] + Acyl-carrier protein_[cyt]	R04960	C05752_[cyt] + C01209_[cyt] => C05753_[cyt] + C00011_[cyt] + C00229_[cyt]	Lipid	A
R321	slr1332	2.3.1.179	Octanoyl-[acp]_[cyt] + Malonyl-[acp]_[cyt] => 3-Oxodecanoyl-[acp]_[cyt] + CO2_[cyt] + Acyl-carrier protein_[cyt]	R04960	C05752_[cyt] + C01209_[cyt] => C05753_[cyt] + C00011_[cyt] + C00229_[cyt]	Lipid	A
R322	sll1069	2.3.1.179	Decanoyl-[acp]_[cyt] + Malonyl-[acp]_[cyt] => 3-Oxododecanoyl-[acp]_[cyt] + CO2_[cyt] + Acyl-carrier protein_[cyt]	R04963	C05755_[cyt] + C01209_[cyt] => C05756_[cyt] + C00011_[cyt] + C00229_[cyt]	Lipid	A
R323	slr1332	2.3.1.179	Decanoyl-[acp]_[cyt] + Malonyl-[acp]_[cyt] => 3-Oxododecanoyl-[acp]_[cyt] + CO2_[cyt] + Acyl-carrier protein_[cyt]	R04963	C05755_[cyt] + C01209_[cyt] => C05756_[cyt] + C00011_[cyt] + C00229_[cyt]	Lipid	A
R324	sll1069	2.3.1.179	Dodecanoyl-[acp]_[cyt] + Malonyl-[acp]_[cyt] => 3-Oxotetradecanoyl-[acp]_[cyt] + CO2_[cyt] + Acyl-carrier protein_[cyt]	R04726	C05223_[cyt] + C01209_[cyt] => C05759_[cyt] + C00011_[cyt] + C00229_[cyt]	Lipid	A
R325	slr1332	2.3.1.179	Dodecanoyl-[acp]_[cyt] + Malonyl-[acp]_[cyt] => 3-Oxotetradecanoyl-[acp]_[cyt] + CO2_[cyt] + Acyl-carrier protein_[cyt]	R04726	C05223_[cyt] + C01209_[cyt] => C05759_[cyt] + C00011_[cyt] + C00229_[cyt]	Lipid	A
R326	sll1069	2.3.1.179	Tetradecanoyl-[acp]_[cyt] + Malonyl-[acp]_[cyt] => 3-Oxohexadecanoyl-[acp]_[cyt] + CO2_[cyt] + Acyl-carrier protein_[cyt]	R04968	C05761_[cyt] + C01209_[cyt] => C05762_[cyt] + C00011_[cyt] + C00229_[cyt]	Lipid	A
R327	slr1332	2.3.1.179	Tetradecanoyl-[acp]_[cyt] + Malonyl-[acp]_[cyt] => 3-Oxohexadecanoyl-[acp]_[cyt] + CO2_[cyt] + Acyl-carrier protein_[cyt]	R04968	C05761_[cyt] + C01209_[cyt] => C05762_[cyt] + C00011_[cyt] + C00229_[cyt]	Lipid	A
R328	sll1069	2.3.1.179	Hexadecanoyl-[acp]_[cyt] + Malonyl-[acp]_[cyt] => 3-Oxostearoyl-[acp]_[cyt] + Acyl-carrier protein_[cyt] + CO2_[cyt]	R07762	C05764_[cyt] + C01209_[cyt] => C16219_[cyt] + C00229_[cyt] + C00011_[cyt]	Lipid	A
R329	slr1332	2.3.1.179	Hexadecanoyl-[acp]_[cyt] + Malonyl-[acp]_[cyt] => 3-Oxostearoyl-[acp]_[cyt] + Acyl-carrier protein_[cyt] + CO2_[cyt]	R07762	C05764_[cyt] + C01209_[cyt] => C16219_[cyt] + C00229_[cyt] + C00011_[cyt]	Lipid	A
R330	slr0886	1.1.1.100	(3R)-3-Hydroxybutanoyl-[acp]_[cyt] + NADP+_[cyt] <=> Acetoacetyl-[acp]_[cyt] + NADPH_[cyt] + H+_[cyt]	R04533	C04618_[cyt] + C00006_[cyt] <=> C05744_[cyt] + C00005_[cyt] + C00080_[cyt]	Lipid	A
R331	sll0330	1.1.1.100	(3R)-3-Hydroxybutanoyl-[acp]_[cyt] + NADP+_[cyt] <=> Acetoacetyl-[acp]_[cyt] + NADPH_[cyt] + H+_[cyt]	R04533	C04618_[cyt] + C00006_[cyt] <=> C05744_[cyt] + C00005_[cyt] + C00080_[cyt]	Lipid	A
R332	sll5079	1.1.1.100	(3R)-3-Hydroxybutanoyl-[acp]_[cyt] + NADP+_[cyt] <=> Acetoacetyl-[acp]_[cyt] + NADPH_[cyt] + H+_[cyt]	R04533	C04618_[cyt] + C00006_[cyt] <=> C05744_[cyt] + C00005_[cyt] + C00080_[cyt]	Lipid	A
R333	slr0886	1.1.1.100	(R)-3-Hydroxyhexanoyl-[acp]_[cyt] + NADP+_[cyt] <=> 3-Oxohexanoyl-[acp]_[cyt] + NADPH_[cyt] + H+_[cyt]	R04953	C05747_[cyt] + C00006_[cyt] <=> C05746_[cyt] + C00005_[cyt] + C00080_[cyt]	Lipid	A
R334	sll0330	1.1.1.100	(R)-3-Hydroxyhexanoyl-[acp]_[cyt] + NADP+_[cyt] <=> 3-Oxohexanoyl-[acp]_[cyt] + NADPH_[cyt] + H+_[cyt]	R04953	C05747_[cyt] + C00006_[cyt] <=> C05746_[cyt] + C00005_[cyt] + C00080_[cyt]	Lipid	A
R335	sll5079	1.1.1.100	(R)-3-Hydroxyhexanoyl-[acp]_[cyt] + NADP+_[cyt] <=> 3-Oxohexanoyl-[acp]_[cyt] + NADPH_[cyt] + H+_[cyt]	R04953	C05747_[cyt] + C00006_[cyt] <=> C05746_[cyt] + C00005_[cyt] + C00080_[cyt]	Lipid	A
R336	slr0886	1.1.1.100	(3R)-3-Hydroxyoctanoyl-[acp]_[cyt] + NADP+_[cyt] <=> 3-Oxooctanoyl-[acp]_[cyt] + NADPH_[cyt] + H+_[cyt]	R04536	C04620_[cyt] + C00006_[cyt] <=> C05750_[cyt] + C00005_[cyt] + C00080_[cyt]	Lipid	A
R337	sll0330	1.1.1.100	(3R)-3-Hydroxyoctanoyl-[acp]_[cyt] + NADP+_[cyt] <=> 3-Oxooctanoyl-[acp]_[cyt] + NADPH_[cyt] + H+_[cyt]	R04536	C04620_[cyt] + C00006_[cyt] <=> C05750_[cyt] + C00005_[cyt] + C00080_[cyt]	Lipid	A
R338	sll5079	1.1.1.100	(3R)-3-Hydroxyoctanoyl-[acp]_[cyt] + NADP+_[cyt] <=> 3-Oxooctanoyl-[acp]_[cyt] + NADPH_[cyt] + H+_[cyt]	R04536	C04620_[cyt] + C00006_[cyt] <=> C05750_[cyt] + C00005_[cyt] + C00080_[cyt]	Lipid	A
R339	slr0886	1.1.1.100	(3R)-3-Hydroxydecanoyl-[acp]_[cyt] + NADP+_[cyt] <=> 3-Oxodecanoyl-[acp]_[cyt] + NADPH_[cyt] + H+_[cyt]	R04534	C04619_[cyt] + C00006_[cyt] <=> C05753_[cyt] + C00005_[cyt] + C00080_[cyt]	Lipid	A
R340	sll0330	1.1.1.100	(3R)-3-Hydroxydecanoyl-[acp]_[cyt] + NADP+_[cyt] <=> 3-Oxodecanoyl-[acp]_[cyt] + NADPH_[cyt] + H+_[cyt]	R04534	C04619_[cyt] + C00006_[cyt] <=> C05753_[cyt] + C00005_[cyt] + C00080_[cyt]	Lipid	A
R341	sll5079	1.1.1.100	(3R)-3-Hydroxydecanoyl-[acp]_[cyt] + NADP+_[cyt] <=> 3-Oxodecanoyl-[acp]_[cyt] + NADPH_[cyt] + H+_[cyt]	R04534	C04619_[cyt] + C00006_[cyt] <=> C05753_[cyt] + C00005_[cyt] + C00080_[cyt]	Lipid	A
R342	slr0886	1.1.1.100	(R)-3-Hydroxydodecanoyl-[acp]_[cyt] + NADP+_[cyt] <=> 3-Oxododecanoyl-[acp]_[cyt] + NADPH_[cyt] + H+_[cyt]	R04964	C05757_[cyt] + C00006_[cyt] <=> C05756_[cyt] + C00005_[cyt] + C00080_[cyt]	Lipid	A
R343	sll0330	1.1.1.100	(R)-3-Hydroxydodecanoyl-[acp]_[cyt] + NADP+_[cyt] <=> 3-Oxododecanoyl-[acp]_[cyt] + NADPH_[cyt] + H+_[cyt]	R04964	C05757_[cyt] + C00006_[cyt] <=> C05756_[cyt] + C00005_[cyt] + C00080_[cyt]	Lipid	A
R344	sll5079	1.1.1.100	(R)-3-Hydroxydodecanoyl-[acp]_[cyt] + NADP+_[cyt] <=> 3-Oxododecanoyl-[acp]_[cyt] + NADPH_[cyt] + H+_[cyt]	R04964	C05757_[cyt] + C00006_[cyt] <=> C05756_[cyt] + C00005_[cyt] + C00080_[cyt]	Lipid	A
R345	slr0886	1.1.1.100	(3R)-3-Hydroxytetradecanoyl-[acp]_[cyt] + NADP+_[cyt] <=> 3-Oxotetradecanoyl-[acp]_[cyt] + NADPH_[cyt] + H+_[cyt]	R04566	C04688_[cyt] + C00006_[cyt] <=> C05759_[cyt] + C00005_[cyt] + C00080_[cyt]	Lipid	A
R346	sll0330	1.1.1.100	(3R)-3-Hydroxytetradecanoyl-[acp]_[cyt] + NADP+_[cyt] <=> 3-Oxotetradecanoyl-[acp]_[cyt] + NADPH_[cyt] + H+_[cyt]	R04566	C04688_[cyt] + C00006_[cyt] <=> C05759_[cyt] + C00005_[cyt] + C00080_[cyt]	Lipid	A
R347	sll5079	1.1.1.100	(3R)-3-Hydroxytetradecanoyl-[acp]_[cyt] + NADP+_[cyt] <=> 3-Oxotetradecanoyl-[acp]_[cyt] + NADPH_[cyt] + H+_[cyt]	R04566	C04688_[cyt] + C00006_[cyt] <=> C05759_[cyt] + C00005_[cyt] + C00080_[cyt]	Lipid	A
R348	slr0886	1.1.1.100	(3R)-3-Hydroxypalmitoyl-[acp]_[cyt] + NADP+_[cyt] <=> 3-Oxohexadecanoyl-[acp]_[cyt] + NADPH_[cyt] + H+_[cyt]	R04543	C04633_[cyt] + C00006_[cyt] <=> C05762_[cyt] + C00005_[cyt] + C00080_[cyt]	Lipid	A
R349	sll0330	1.1.1.100	(3R)-3-Hydroxypalmitoyl-[acp]_[cyt] + NADP+_[cyt] <=> 3-Oxohexadecanoyl-[acp]_[cyt] + NADPH_[cyt] + H+_[cyt]	R04543	C04633_[cyt] + C00006_[cyt] <=> C05762_[cyt] + C00005_[cyt] + C00080_[cyt]	Lipid	A
R350	sll5079	1.1.1.100	(3R)-3-Hydroxypalmitoyl-[acp]_[cyt] + NADP+_[cyt] <=> 3-Oxohexadecanoyl-[acp]_[cyt] + NADPH_[cyt] + H+_[cyt]	R04543	C04633_[cyt] + C00006_[cyt] <=> C05762_[cyt] + C00005_[cyt] + C00080_[cyt]	Lipid	A
R351	slr0886	1.1.1.100	3-Oxostearoyl-[acp]_[cyt] + NADPH_[cyt] + H+_[cyt] <=> 3-Hydroxyoctadecanoyl-[acp]_[cyt] + NADP+_[cyt]	R07763	C16219_[cyt] + C00005_[cyt] + C00080_[cyt] <=> C16220_[cyt] + C00006_[cyt]	Lipid	A
R352	sll0330	1.1.1.100	3-Oxostearoyl-[acp]_[cyt] + NADPH_[cyt] + H+_[cyt] <=> 3-Hydroxyoctadecanoyl-[acp]_[cyt] + NADP+_[cyt]	R07763	C16219_[cyt] + C00005_[cyt] + C00080_[cyt] <=> C16220_[cyt] + C00006_[cyt]	Lipid	A
R353	sll5079	1.1.1.100	3-Oxostearoyl-[acp]_[cyt] + NADPH_[cyt] + H+_[cyt] <=> 3-Hydroxyoctadecanoyl-[acp]_[cyt] + NADP+_[cyt]	R07763	C16219_[cyt] + C00005_[cyt] + C00080_[cyt] <=> C16220_[cyt] + C00006_[cyt]	Lipid	A
R354	sll1605	4.2.1.-	(3R)-3-Hydroxybutanoyl-[acp]_[cyt] <=> But-2-enoyl-[acp]_[cyt] + H2O_[cyt]	R04428	C04618_[cyt] <=> C04246_[cyt] + C00001_[cyt]	Lipid	A
R355	sll1605	4.2.1.-	(R)-3-Hydroxyhexanoyl-[acp]_[cyt] <=> trans-Hex-2-enoyl-[acp]_[cyt] + H2O_[cyt]	R04954	C05747_[cyt] <=> C05748_[cyt] + C00001_[cyt]	Lipid	A
R356	sll1605	4.2.1.-	(3R)-3-Hydroxyoctanoyl-[acp]_[cyt] <=> trans-Oct-2-enoyl-[acp]_[cyt] + H2O_[cyt]	R04537	C04620_[cyt] <=> C05751_[cyt] + C00001_[cyt]	Lipid	A
R357	sll1605	4.2.1.-	(3R)-3-Hydroxydecanoyl-[acp]_[cyt] <=> trans-Dec-2-enoyl-[acp]_[cyt] + H2O_[cyt]	R04535	C04619_[cyt] <=> C05754_[cyt] + C00001_[cyt]	Lipid	A
R358	sll1605	4.2.1.-	(R)-3-Hydroxydodecanoyl-[acp]_[cyt] <=> trans-Dodec-2-enoyl-[acp]_[cyt] + H2O_[cyt]	R04965	C05757_[cyt] <=> C05758_[cyt] + C00001_[cyt]	Lipid	A
R359	sll1605	4.2.1.-	(3R)-3-Hydroxytetradecanoyl-[acp]_[cyt] <=> trans-Tetradec-2-enoyl-[acp]_[cyt] + H2O_[cyt]	R04568	C04688_[cyt] <=> C05760_[cyt] + C00001_[cyt]	Lipid	A
R360	sll1605	4.2.1.-	(3R)-3-Hydroxypalmitoyl-[acp]_[cyt] <=> trans-Hexadec-2-enoyl-[acp]_[cyt] + H2O_[cyt]	R04544	C04633_[cyt] <=> C05763_[cyt] + C00001_[cyt]	Lipid	A
R361	sll1605	4.2.1.-	3-Hydroxyoctadecanoyl-[acp]_[cyt] <=> (2E)-Octadecenoyl-[acp]_[cyt] + H2O_[cyt]	R07764	C16220_[cyt] <=> C16221_[cyt] + C00001_[cyt]	Lipid	A
R362	slr1051	1.3.1.10	Butyryl-[acp]_[cyt] + NADP+_[cyt] <=> But-2-enoyl-[acp]_[cyt] + NADPH_[cyt] + H+_[cyt]	R04430	C05745_[cyt] + C00006_[cyt] <=> C04246_[cyt] + C00005_[cyt] + C00080_[cyt]	Lipid	A
R363	slr1051	1.3.1.10	Hexanoyl-[acp]_[cyt] + NADP+_[cyt] <=> trans-Hex-2-enoyl-[acp]_[cyt] + NADPH_[cyt] + H+_[cyt]	R04955	C05749_[cyt] + C00006_[cyt] <=> C05748_[cyt] + C00005_[cyt] + C00080_[cyt]	Lipid	A
R364	slr1051	1.3.1.10	Octanoyl-[acp]_[cyt] + NADP+_[cyt] <=> trans-Oct-2-enoyl-[acp]_[cyt] + NADPH_[cyt] + H+_[cyt]	R04958	C05752_[cyt] + C00006_[cyt] <=> C05751_[cyt] + C00005_[cyt] + C00080_[cyt]	Lipid	A
R365	slr1051	1.3.1.10	Decanoyl-[acp]_[cyt] + NADP+_[cyt] <=> trans-Dec-2-enoyl-[acp]_[cyt] + NADPH_[cyt] + H+_[cyt]	R04962	C05755_[cyt] + C00006_[cyt] <=> C05754_[cyt] + C00005_[cyt] + C00080_[cyt]	Lipid	A
R366	slr1051	1.3.1.10	Dodecanoyl-[acp]_[cyt] + NADP+_[cyt] <=> trans-Dodec-2-enoyl-[acp]_[cyt] + NADPH_[cyt] + H+_[cyt]	R04725	C05223_[cyt] + C00006_[cyt] <=> C05758_[cyt] + C00005_[cyt] + C00080_[cyt]	Lipid	A
R367	slr1051	1.3.1.10	Tetradecanoyl-[acp]_[cyt] + NADP+_[cyt] <=> trans-Tetradec-2-enoyl-[acp]_[cyt] + NADPH_[cyt] + H+_[cyt]	R04967	C05761_[cyt] + C00006_[cyt] <=> C05760_[cyt] + C00005_[cyt] + C00080_[cyt]	Lipid	A
R368	slr1051	1.3.1.10	Hexadecanoyl-[acp]_[cyt] + NADP+_[cyt] <=> trans-Hexadec-2-enoyl-[acp]_[cyt] + NADPH_[cyt] + H+_[cyt]	R04970	C05764_[cyt] + C00006_[cyt] <=> C05763_[cyt] + C00005_[cyt] + C00080_[cyt]	Lipid	A
R369	slr1051	1.3.1.10	(2E)-Octadecenoyl-[acp]_[cyt] + NADPH_[cyt] + H+_[cyt] <=> Octadecanoyl-[acp]_[cyt] + NADP+_[cyt]	-	C16221_[cyt] + C00005_[cyt] + C00080_[cyt] <=> C04088_[cyt] + C00006_[cyt]	Lipid	A
R370	sll0541	1.14.19.1	Hexadecanoyl-[acp]_[cyt] + NADPH_[cyt] + H+_[cyt] + Oxygen_[cyt] <=> Hexadecenoyl-[acp]_[cyt] + NADP+_[cyt] + 2 H2O_[cyt]	-	C05764_[cyt] + C00005_[cyt] + C00080_[cyt] + C00007_[cyt] <=> C16520_[cyt] + C00006_[cyt] + 2 C00001_[cyt]	Lipid	B	desC, delta-9 desaturase; Roughan et al. 1980; Browse et al. 1986
R371	sll0541	1.14.19.1	Octadecanoyl-[acp]_[cyt] + NADPH_[cyt] + H+_[cyt] + Oxygen_[cyt] <=> Oleoyl-[acp]_[cyt] + NADP+_[cyt] + 2 H2O_[cyt]	-	C04088_[cyt] + C00005_[cyt] + C00080_[cyt] + C00007_[cyt] <=> C01203_[cyt] + C00006_[cyt] + 2 C00001_[cyt]	Lipid	B	desC, delta-9 desaturase; Roughan et al. 1980; Browse et al. 1986
R372	slr1350	1.14.19.-	Oleoyl-[acp]_[cyt] + NADPH_[cyt] + H+_[cyt] + Oxygen_[cyt] <=> Linoleoyl-[acp]_[cyt] + NADP+_[cyt] + 2 H2O_[cyt]	-	C01203_[cyt] + C00005_[cyt] + C00080_[cyt] + C00007_[cyt] <=> C16160_[cyt] + C00006_[cyt] + 2 C00001_[cyt]	Lipid	B	desA, delta-12 desaturase; Roughan et al. 1980; Browse et al. 1986
R373	sll0262	1.14.19.3	Linoleoyl-[acp]_[cyt] + NADPH_[cyt] + H+_[cyt] + Oxygen_[cyt] <=> gamma-Linolenoyl-[acp]_[cyt] + NADP+_[cyt] + 2 H2O_[cyt]	-	C16160_[cyt] + C00005_[cyt] + C00080_[cyt] + C00007_[cyt] <=> E17_[cyt] + C00006_[cyt] + 2 C00001_[cyt]	Lipid	B	desD, delta-6 desaturase; Roughan et al. 1980; Browse et al. 1986
R374	sll1441	1.14.19.-	Linoleoyl-[acp]_[cyt] + NADPH_[cyt] + H+_[cyt] + Oxygen_[cyt] <=> alpha-Linolenoyl-[acp]_[cyt] + NADP+_[cyt] + 2 H2O_[cyt]	-	C16160_[cyt] + C00005_[cyt] + C00080_[cyt] + C00007_[cyt] <=> C16161_[cyt] + C00006_[cyt] + 2 C00001_[cyt]	Lipid	B	desB, delta-15 desaturase; Roughan et al. 1980; Browse et al. 1986
R375	sll0262	1.14.19.3	alpha-Linolenoyl-[acp]_[cyt] + NADPH_[cyt] + H+_[cyt] + Oxygen_[cyt] <=> Stearidonoyl-[acp]_[cyt] + NADP+_[cyt] + 2 H2O_[cyt]	-	C16161_[cyt] + C00005_[cyt] + C00080_[cyt] + C00007_[cyt] <=> E36_[cyt] + C00006_[cyt] + 2 C00001_[cyt]	Lipid	B	desD, delta-6 desaturase; Roughan et al. 1980; Browse et al. 1986
R376	sll0379	2.3.1.129	(3R)-3-Hydroxytetradecanoyl-[acp]_[cyt] + UDP-N-acetyl-D-glucosamine_[cyt] => Acyl-carrier protein_[cyt] + UDP-3-O-(3-hydroxytetradecanoyl)-N-acetylglucosamine_[cyt]	R04567	C04688_[cyt] + C00043_[cyt] => C00229_[cyt] + C04738_[cyt]	Lipid-A-disaccharide	A
R377	sll1508	3.5.1.108	UDP-3-O-(3-hydroxytetradecanoyl)-N-acetylglucosamine_[cyt] + H2O_[cyt] => UDP-3-O-(3-hydroxytetradecanoyl)-D-glucosamine_[cyt] + Acetate_[cyt]	R04587	C04738_[cyt] + C00001_[cyt] => C06022_[cyt] + C00033_[cyt]	Lipid-A-disaccharide	A
R378	slr0776	2.3.1.191	UDP-2,3-bis(3-hydroxytetradecanoyl)glucosamine_[cyt] + Acyl-carrier protein_[cyt] <= UDP-3-O-(3-hydroxytetradecanoyl)-D-glucosamine_[cyt] + (3R)-3-Hydroxytetradecanoyl-[acp]_[cyt]	R04550	C04652_[cyt] + C00229_[cyt] <= C06022_[cyt] + C04688_[cyt]	Lipid-A-disaccharide	A
R379	slr0015, slr1677	2.4.1.182	UDP-2,3-bis(3-hydroxytetradecanoyl)glucosamine_[cyt] + Lipid X_[cyt] => UDP_[cyt] + Lipid A disaccharide_[cyt]	R04606	C04652_[cyt] + C04824_[cyt] => C00015_[cyt] + C04932_[cyt]	Lipid-A-disaccharide	A
R380	-	3.6.1.54	UDP-2,3-bis(3-hydroxytetradecanoyl)glucosamine_[cyt] + H2O_[cyt] => UMP_[cyt] + Lipid X_[cyt]	R04549	C04652_[cyt] + C00001_[cyt] => C00105_[cyt] + C04824_[cyt]	Lipid-A-disaccharide	E	No genes could be identified
R381	sll0631	1.4.3.16	L-Aspartate_[cyt] + Oxygen_[cyt] => Iminoaspartate_[cyt] + H2O2_[cyt]	R00481	C00049_[cyt] + C00007_[cyt] => C05840_[cyt] + C00027_[cyt]	Nicotinamide	A
R382	sll0622	2.5.1.72	Pyridine-2,3-dicarboxylate_[cyt] + 2 H2O_[cyt] + Orthophosphate_[cyt] <= Iminoaspartate_[cyt] + Glycerone phosphate_[cyt]	R04292	C03722_[cyt] + 2 C00001_[cyt] + C00009_[cyt] <= C05840_[cyt] + C00111_[cyt]	Nicotinamide	A
R383	slr0936	2.4.2.19	Nicotinate D-ribonucleotide_[cyt] + Diphosphate_[cyt] + CO2_[cyt] <= Pyridine-2,3-dicarboxylate_[cyt] + 5-Phospho-alpha-D-ribose 1-diphosphate_[cyt] + H+_[cyt]	R03348	C01185_[cyt] + C00013_[cyt] + C00011_[cyt] <= C03722_[cyt] + C00119_[cyt] + C00080_[cyt]	Nicotinamide	A
R384	sll1916	2.7.7.18	ATP_[cyt] + Nicotinate D-ribonucleotide_[cyt] <=> Diphosphate_[cyt] + Deamino-NAD+_[cyt]	R03005	C00002_[cyt] + C01185_[cyt] <=> C00013_[cyt] + C00857_[cyt]	Nicotinamide	A
R385	slr0787	2.7.7.1	ATP_[cyt] + Nicotinate D-ribonucleotide_[cyt] <=> Diphosphate_[cyt] + Deamino-NAD+_[cyt]	R03005	C00002_[cyt] + C01185_[cyt] <=> C00013_[cyt] + C00857_[cyt]	Nicotinamide	A
R386	slr1691	6.3.5.1	ATP_[cyt] + Deamino-NAD+_[cyt] + L-Glutamine_[cyt] + H2O_[cyt] => AMP_[cyt] + Diphosphate_[cyt] + NAD+_[cyt] + L-Glutamate_[cyt]	R00257	C00002_[cyt] + C00857_[cyt] + C00064_[cyt] + C00001_[cyt] => C00020_[cyt] + C00013_[cyt] + C00003_[cyt] + C00025_[cyt]	Nicotinamide	A
R387	sll1415	2.7.1.23	ATP_[cyt] + NAD+_[cyt] => ADP_[cyt] + NADP+_[cyt]	R00104	C00002_[cyt] + C00003_[cyt] => C00008_[cyt] + C00006_[cyt]	Nicotinamide	A
R388	slr0400	2.7.1.23	ATP_[cyt] + NAD+_[cyt] => ADP_[cyt] + NADP+_[cyt]	R00104	C00002_[cyt] + C00003_[cyt] => C00008_[cyt] + C00006_[cyt]	Nicotinamide	A
R389	slr0788	2.4.2.11	Nicotinate D-ribonucleotide_[cyt] + Diphosphate_[cyt] <=> Nicotinate_[cyt] + 5-Phospho-alpha-D-ribose 1-diphosphate_[cyt] + H+_[cyt]	R05223	C01185_[cyt] + C00013_[cyt] <=> C00253_[cyt] + C00119_[cyt] + C00080_[cyt]	Nicotinamide	A
R390	sll0892	4.1.1.11	L-Aspartate_[cyt] => beta-Alanine_[cyt] + CO2_[cyt]	R00489	C00049_[cyt] => C00099_[cyt] + C00011_[cyt]	Pantothenate and CoA	A
R391	sll1641	4.1.1.15	L-Aspartate_[cyt] => beta-Alanine_[cyt] + CO2_[cyt]	R00489	C00049_[cyt] => C00099_[cyt] + C00011_[cyt]	Pantothenate and CoA	A
R392	slr0526	2.1.2.11	5,10-Methylenetetrahydrofolate_[cyt] + 3-Methyl-2-oxobutanoic acid_[cyt] + H2O_[cyt] => Tetrahydrofolate_[cyt] + 2-Dehydropantoate_[cyt]	R01226	C00143_[cyt] + C00141_[cyt] + C00001_[cyt] => C00101_[cyt] + C00966_[cyt]	Pantothenate and CoA	A
R393	sll1363	1.1.1.86	(R)-Pantoate_[cyt] + NADP+_[cyt] <=> 2-Dehydropantoate_[cyt] + NADPH_[cyt] + H+_[cyt]	R02472	C00522_[cyt] + C00006_[cyt] <=> C00966_[cyt] + C00005_[cyt] + C00080_[cyt]	Pantothenate and CoA	D	sll1363 is coding for Isoleucine, Leucine and ValineC (1.1.1.86) which also can as 2-dehydropantoate 2-reductase (at least in C. glutamicum); Merkamm et al. 2003
R394	sll1249	6.3.2.1	ATP_[cyt] + (R)-Pantoate_[cyt] + beta-Alanine_[cyt] => AMP_[cyt] + Diphosphate_[cyt] + Pantothenate_[cyt]	R02473	C00002_[cyt] + C00522_[cyt] + C00099_[cyt] => C00020_[cyt] + C00013_[cyt] + C00864_[cyt]	Pantothenate and CoA	A
R395	slr0812	2.7.1.33	ATP_[cyt] + Pantothenate_[cyt] => ADP_[cyt] + D-4'-Phosphopantothenate_[cyt]	R03018	C00002_[cyt] + C00864_[cyt] => C00008_[cyt] + C03492_[cyt]	Pantothenate and CoA	A
R396	sll0250	4.1.1.36	(R)-4'-Phosphopantothenoyl-L-cysteine_[cyt] => Pantetheine 4'-phosphate_[cyt] + CO2_[cyt]	R03269	C04352_[cyt] => C01134_[cyt] + C00011_[cyt]	Pantothenate and CoA	A
R397	sll0250	6.3.2.5	ATP_[cyt] + D-4'-Phosphopantothenate_[cyt] + L-Cysteine_[cyt] => AMP_[cyt] + Diphosphate_[cyt] + (R)-4'-Phosphopantothenoyl-L-cysteine_[cyt]	R04230	C00002_[cyt] + C03492_[cyt] + C00097_[cyt] => C00020_[cyt] + C00013_[cyt] + C04352_[cyt]	Pantothenate and CoA	A
R398	sll0250	6.3.2.5	CTP_[cyt] + D-4'-Phosphopantothenate_[cyt] + L-Cysteine_[cyt] => CMP_[cyt] + Diphosphate_[cyt] + (R)-4'-Phosphopantothenoyl-L-cysteine_[cyt]	R04231	C00063_[cyt] + C03492_[cyt] + C00097_[cyt] => C00055_[cyt] + C00013_[cyt] + C04352_[cyt]	Pantothenate and CoA	A
R399	slr0847	2.7.7.3	ATP_[cyt] + Pantetheine 4'-phosphate_[cyt] => Diphosphate_[cyt] + Dephospho-CoA_[cyt]	R03035	C00002_[cyt] + C01134_[cyt] => C00013_[cyt] + C00882_[cyt]	Pantothenate and CoA	A
R400	slr0553	2.7.1.24	ATP_[cyt] + Dephospho-CoA_[cyt] => ADP_[cyt] + CoA_[cyt]	R00130	C00002_[cyt] + C00882_[cyt] => C00008_[cyt] + C00010_[cyt]	Pantothenate and CoA	A
R401	sll0220	2.6.1.16	L-Glutamine_[cyt] + D-Fructose 6-phosphate_[cyt] <=> L-Glutamate_[cyt] + D-Glucosamine 6-phosphate_[cyt]	R00768	C00064_[cyt] + C00085_[cyt] <=> C00025_[cyt] + C00352_[cyt]	Peptidoglycan	A
R402	sll1758	5.4.2.10	alpha-D-Glucosamine 1-phosphate_[cyt] <=> D-Glucosamine 6-phosphate_[cyt]	R02060	C06156_[cyt] <=> C00352_[cyt]	Peptidoglycan	A
R403	sll0899	2.3.1.157	Acetyl-CoA_[cyt] + alpha-D-Glucosamine 1-phosphate_[cyt] => CoA_[cyt] + N-Acetyl-alpha-D-glucosamine 1-phosphate_[cyt]	R05332	C00024_[cyt] + C06156_[cyt] => C00010_[cyt] + C04501_[cyt]	Peptidoglycan	A
R404	sll0899	2.7.7.23	UTP_[cyt] + N-Acetyl-alpha-D-glucosamine 1-phosphate_[cyt] => Diphosphate_[cyt] + UDP-N-acetyl-D-glucosamine_[cyt]	R00416	C00075_[cyt] + C04501_[cyt] => C00013_[cyt] + C00043_[cyt]	Peptidoglycan	A
R405	slr0017	2.5.1.7	Phosphoenolpyruvate_[cyt] + UDP-N-acetyl-D-glucosamine_[cyt] => UDP-N-acetyl-3-(1-carboxyvinyl)-D-glucosamine_[cyt] + Orthophosphate_[cyt]	R00660	C00074_[cyt] + C00043_[cyt] => C04631_[cyt] + C00009_[cyt]	Peptidoglycan	A
R406	slr1424	1.1.1.158	UDP-N-acetylmuramate_[cyt] + NADP+_[cyt] <=> UDP-N-acetyl-3-(1-carboxyvinyl)-D-glucosamine_[cyt] + NADPH_[cyt] + H+_[cyt]	R03192	C01050_[cyt] + C00006_[cyt] <=> C04631_[cyt] + C00005_[cyt] + C00080_[cyt]	Peptidoglycan	A
R407	slr1423	6.3.2.8	ATP_[cyt] + UDP-N-acetylmuramate_[cyt] + L-Alanine_[cyt] => ADP_[cyt] + Orthophosphate_[cyt] + UDP-N-acetylmuramoyl-L-alanine_[cyt]	R03193	C00002_[cyt] + C01050_[cyt] + C00041_[cyt] => C00008_[cyt] + C00009_[cyt] + C01212_[cyt]	Peptidoglycan	A
R408	sll2010	6.3.2.9	ATP_[cyt] + UDP-N-acetylmuramoyl-L-alanine_[cyt] + D-Glutamate_[cyt] => ADP_[cyt] + Orthophosphate_[cyt] + UDP-N-acetylmuramoyl-L-alanyl-D-glutamate_[cyt]	R02783	C00002_[cyt] + C01212_[cyt] + C00217_[cyt] => C00008_[cyt] + C00009_[cyt] + C00692_[cyt]	Peptidoglycan	A
R409	slr0528	6.3.2.13	ATP_[cyt] + UDP-N-acetylmuramoyl-L-alanyl-D-glutamate_[cyt] + meso-2,6-Diaminoheptanedioate_[cyt] => ADP_[cyt] + Orthophosphate_[cyt] + UDP-N-acetylmuramoyl-L-alanyl-D-gamma-glutamyl-meso-2,6-diaminopimelate_[cyt]	R02788	C00002_[cyt] + C00692_[cyt] + C00680_[cyt] => C00008_[cyt] + C00009_[cyt] + C04877_[cyt]	Peptidoglycan	A	Jurgens et al. 1983
R410	slr1746	5.1.1.3	L-Glutamate_[cyt] <=> D-Glutamate_[cyt]	R00260	C00025_[cyt] <=> C00217_[cyt]	Peptidoglycan	A
R411	slr0827	5.1.1.1	L-Alanine_[cyt] <=> D-Alanine_[cyt]	R00401	C00041_[cyt] <=> C00133_[cyt]	Peptidoglycan	A
R412	slr1874	6.3.2.4	ATP_[cyt] + 2 D-Alanine_[cyt] => ADP_[cyt] + Orthophosphate_[cyt] + D-Alanyl-D-alanine_[cyt]	R01150	C00002_[cyt] + 2 C00133_[cyt] => C00008_[cyt] + C00009_[cyt] + C00993_[cyt]	Peptidoglycan	A
R413	slr1351	6.3.2.10	ATP_[cyt] + UDP-N-acetylmuramoyl-L-alanyl-D-gamma-glutamyl-meso-2,6-diaminopimelate_[cyt] + D-Alanyl-D-alanine_[cyt] => ADP_[cyt] + Orthophosphate_[cyt] + UDP-N-acetylmuramoyl-L-alanyl-D-glutamyl-6-carboxy-L-lysyl-D-alanyl-D-alanine_[cyt]	R04617	C00002_[cyt] + C04877_[cyt] + C00993_[cyt] => C00008_[cyt] + C00009_[cyt] + C04882_[cyt]	Peptidoglycan	A
R414	sll0657	2.7.8.13	UDP-N-acetylmuramoyl-L-alanyl-D-glutamyl-6-carboxy-L-lysyl-D-alanyl-D-alanine_[cyt] + di-trans,poly-cis-Undecaprenyl phosphate_[cyt] => UMP_[cyt] + Undecaprenyl-diphospho-N-acetylmuramoyl-L-alanyl-D-glutamyl-meso-2,6-diaminopimeloyl-D-alanyl-D-alanine_[cy	R05630	C04882_[cyt] + C17556_[cyt] => C00105_[cyt] + C05897_[cyt]	Peptidoglycan	A
R415	slr1656	2.4.1.227	Undecaprenyl-diphospho-N-acetylmuramoyl-L-alanyl-D-glutamyl-meso-2,6-diaminopimeloyl-D-alanyl-D-alanine_[cyt] + UDP-N-acetyl-D-glucosamine_[cyt] => Undecaprenyl-diphospho-N-acetylmuramoyl-(N-acetylglucosamine)-L-alanyl-D-glutamyl-meso-2,6-diaminopimeloyl-	R05032	C05897_[cyt] + C00043_[cyt] => C05898_[cyt] + C00015_[cyt]	Peptidoglycan	A
R416	sll1833	2.4.1.129	Undecaprenyl-diphospho-N-acetylmuramoyl-(N-acetylglucosamine)-L-alanyl-D-glutamyl-meso-2,6-diaminopimeloyl-D-alanyl-D-alanine_[cyt] + H2O_[cyt] => di-trans,poly-cis-Undecaprenyl diphosphate_[cyt] + [GlcNAc-(1->4)-Mur2Ac(oyl-L-Ala-g-D-Glu-A2pm-D-Ala-D-Ala)	-	C05898_[cyt] + C00001_[cyt] => C04574_[cyt] + C11827_[cyt] + C00133_[cyt]	Peptidoglycan	C	BLAST search: identity 56%, score 670, E-value 0.0 to Peptidoglycan glycosyltransferasefrom Cyanothece sp. PCC 7424
R417	slr1710	2.4.1.129	Undecaprenyl-diphospho-N-acetylmuramoyl-(N-acetylglucosamine)-L-alanyl-D-glutamyl-meso-2,6-diaminopimeloyl-D-alanyl-D-alanine_[cyt] + H2O_[cyt] => di-trans,poly-cis-Undecaprenyl diphosphate_[cyt] + [GlcNAc-(1->4)-Mur2Ac(oyl-L-Ala-g-D-Glu-A2pm-D-Ala-D-Ala)	-	C05898_[cyt] + C00001_[cyt] => C04574_[cyt] + C11827_[cyt] + C00133_[cyt]	Peptidoglycan	A
R418	sll0210	3.6.1.27	di-trans,poly-cis-Undecaprenyl diphosphate_[cyt] + H2O_[cyt] => di-trans,poly-cis-Undecaprenyl phosphate_[cyt] + Orthophosphate_[cyt]	R05627	C04574_[cyt] + C00001_[cyt] => C17556_[cyt] + C00009_[cyt]	Peptidoglycan	A
R419	sll0018	4.1.2.13	D-Sedoheptulose 1,7-bisphosphate_[cyt] <= Glycerone phosphate_[cyt] + D-Erythrose 4-phosphate_[cyt]	R01829	C00447_[cyt] <= C00111_[cyt] + C00279_[cyt]	Pentose phosphate pathway & Calvin-Benson Cycle	A	Nakahara et al. 2003
R420	slr0943	4.1.2.13	D-Sedoheptulose 1,7-bisphosphate_[cyt] <= Glycerone phosphate_[cyt] + D-Erythrose 4-phosphate_[cyt]	R01829	C00447_[cyt] <= C00111_[cyt] + C00279_[cyt]	Pentose phosphate pathway & Calvin-Benson Cycle	A	Nakahara et al. 2003
R421	slr2094	3.1.3.37	D-Sedoheptulose 1,7-bisphosphate_[cyt] + H2O_[cyt] => D-Sedoheptulose 7-phosphate_[cyt] + Orthophosphate_[cyt]	R01845	C00447_[cyt] + C00001_[cyt] => C05382_[cyt] + C00009_[cyt]	Pentose phosphate pathway & Calvin-Benson Cycle	A
R422	slr1843	1.1.1.49	D-Glucose 6-phosphate_[cyt] + NADP+_[cyt] => D-Glucono-1,5-lactone 6-phosphate_[cyt] + NADPH_[cyt] + H+_[cyt]	R00835	C00092_[cyt] + C00006_[cyt] => C01236_[cyt] + C00005_[cyt] + C00080_[cyt]	Pentose phosphate pathway & Calvin-Benson Cycle	A
R423	sll1479	3.1.1.31	D-Glucono-1,5-lactone 6-phosphate_[cyt] + H2O_[cyt] => 6-Phospho-D-gluconate_[cyt]	R02035	C01236_[cyt] + C00001_[cyt] => C00345_[cyt]	Pentose phosphate pathway & Calvin-Benson Cycle	A
R424	sll0329	1.1.1.44	6-Phospho-D-gluconate_[cyt] + NADP+_[cyt] => D-Ribulose 5-phosphate_[cyt] + CO2_[cyt] + NADPH_[cyt] + H+_[cyt]	R01528	C00345_[cyt] + C00006_[cyt] => C00199_[cyt] + C00011_[cyt] + C00005_[cyt] + C00080_[cyt]	Pentose phosphate pathway & Calvin-Benson Cycle	A
R425	slr0194	5.3.1.6	D-Ribose 5-phosphate_[cyt] <=> D-Ribulose 5-phosphate_[cyt]	R01056	C00117_[cyt] <=> C00199_[cyt]	Pentose phosphate pathway & Calvin-Benson Cycle	A
R426	ssl2153	5.3.1.6	D-Ribose 5-phosphate_[cyt] <=> D-Ribulose 5-phosphate_[cyt]	R01056	C00117_[cyt] <=> C00199_[cyt]	Pentose phosphate pathway & Calvin-Benson Cycle	A
R427	sll1070	2.2.1.1	D-Sedoheptulose 7-phosphate_[cyt] + D-Glyceraldehyde 3-phosphate_[cyt] <=> D-Ribose 5-phosphate_[cyt] + D-Xylulose 5-phosphate_[cyt]	R01641	C05382_[cyt] + C00118_[cyt] <=> C00117_[cyt] + C00231_[cyt]	Pentose phosphate pathway & Calvin-Benson Cycle	A
R428	sll1070	2.2.1.1	D-Fructose 6-phosphate_[cyt] + D-Glyceraldehyde 3-phosphate_[cyt] <=> D-Erythrose 4-phosphate_[cyt] + D-Xylulose 5-phosphate_[cyt]	R01067	C00085_[cyt] + C00118_[cyt] <=> C00279_[cyt] + C00231_[cyt]	Pentose phosphate pathway & Calvin-Benson Cycle	A
R429	sll0807	5.1.3.1	D-Ribulose 5-phosphate_[cyt] <=> D-Xylulose 5-phosphate_[cyt]	R01529	C00199_[cyt] <=> C00231_[cyt]	Pentose phosphate pathway & Calvin-Benson Cycle	A
R430	slr1793	2.2.1.2	D-Sedoheptulose 7-phosphate_[cyt] + D-Glyceraldehyde 3-phosphate_[cyt] <=> D-Erythrose 4-phosphate_[cyt] + D-Fructose 6-phosphate_[cyt]	R08575	C05382_[cyt] + C00118_[cyt] <=> C00279_[cyt] + C00085_[cyt]	Pentose phosphate pathway & Calvin-Benson Cycle	A
R431	slr0009, slr0012	4.1.1.39	D-Ribulose 1,5-bisphosphate_[cax] + 0.97 CO2_[cax] + 0.97 H2O_[cax] + 0.03 Oxygen_[cax] => 1.97 3-Phospho-D-glycerate_[cax] + 0.03 2-Phosphoglycolate_[cax]	R00024	C01182_[cax] + 0.97 C00011_[cax] + 0.97 C00001_[cax] + 0.03 C00007_[cax] => 1.97 C00197_[cax] + 0.03 C00988_[cax]	Pentose phosphate pathway & Calvin-Benson Cycle	A	RuBisCO including a forced photorespiration rate of 3 %
R432	sll1525	2.7.1.19	ATP_[cyt] + D-Ribulose 5-phosphate_[cyt] => ADP_[cyt] + D-Ribulose 1,5-bisphosphate_[cyt]	R01523	C00002_[cyt] + C00199_[cyt] => C00008_[cyt] + C01182_[cyt]	Pentose phosphate pathway & Calvin-Benson Cycle	A
R433	sll0469	2.7.6.1	ATP_[cyt] + D-Ribose 5-phosphate_[cyt] <=> AMP_[cyt] + 5-Phospho-alpha-D-ribose 1-diphosphate_[cyt]	R01049	C00002_[cyt] + C00117_[cyt] <=> C00020_[cyt] + C00119_[cyt]	Pentose phosphate pathway & Calvin-Benson Cycle	A
R434	sll0036	4.2.3.3	Glycerone phosphate_[cyt] => Methylglyoxal_[cyt] + Orthophosphate_[cyt]	R01016	C00111_[cyt] => C00546_[cyt] + C00009_[cyt]	Pentose phosphate pathway & Calvin-Benson Cycle	A
R435	slr0381	4.4.1.5	(R)-S-Lactoylglutathione_[cyt] <=> Glutathione_[cyt] + Methylglyoxal_[cyt]	R02530	C03451_[cyt] <=> C00051_[cyt] + C00546_[cyt]	Pentose phosphate pathway & Calvin-Benson Cycle	A
R436	sll1019 or slr1259	3.1.2.6	(R)-S-Lactoylglutathione_[cyt] + H2O_[cyt] => Glutathione_[cyt] + (R)-Lactate_[cyt]	R01736	C03451_[cyt] + C00001_[cyt] => C00051_[cyt] + C00256_[cyt]	Pentose phosphate pathway & Calvin-Benson Cycle	A
R437	sll0529	4.1.2.22	D-Fructose 6-phosphate_[cyt] + Orthophosphate_[cyt] => Acetyl phosphate_[cyt] + D-Erythrose 4-phosphate_[cyt] + H2O_[cyt]	R00761	C00085_[cyt] + C00009_[cyt] => C00227_[cyt] + C00279_[cyt] + C00001_[cyt]	Pentose phosphate pathway & Calvin-Benson Cycle	C	BLAST search: identity 80.4 %, score 1203, E-value 0.0 to D-xylulose 5-phosphate/D-fructose 6-phosphate phosphoketolase from Cyanothece sp. PCC 8801
R438	slr0453	4.1.2.22	D-Fructose 6-phosphate_[cyt] + Orthophosphate_[cyt] => Acetyl phosphate_[cyt] + D-Erythrose 4-phosphate_[cyt] + H2O_[cyt]	R00761	C00085_[cyt] + C00009_[cyt] => C00227_[cyt] + C00279_[cyt] + C00001_[cyt]	Pentose phosphate pathway & Calvin-Benson Cycle	C	BLAST search: identity 67 %, score 1163, E-value 0.0 to D-xylulose 5-phosphate/D-fructose 6-phosphate phosphoketolase from Acaryochloris marina MBIC11017
R439	sll0529	4.1.2.22	D-Xylulose 5-phosphate_[cyt] + Orthophosphate_[cyt] => Acetyl phosphate_[cyt] + D-Glyceraldehyde 3-phosphate_[cyt] + H2O_[cyt]	R01621	C00231_[cyt] + C00009_[cyt] => C00227_[cyt] + C00118_[cyt] + C00001_[cyt]	Pentose phosphate pathway & Calvin-Benson Cycle	C	BLAST search: identity 80.4 %, score 1203, E-value 0.0 to D-xylulose 5-phosphate/D-fructose 6-phosphate phosphoketolase from Cyanothece sp. PCC 8801
R440	slr0453	4.1.2.22	D-Xylulose 5-phosphate_[cyt] + Orthophosphate_[cyt] => Acetyl phosphate_[cyt] + D-Glyceraldehyde 3-phosphate_[cyt] + H2O_[cyt]	R01621	C00231_[cyt] + C00009_[cyt] => C00227_[cyt] + C00118_[cyt] + C00001_[cyt]	Pentose phosphate pathway & Calvin-Benson Cycle	C	BLAST search: identity 67 %, score 1163, E-value 0.0 to D-xylulose 5-phosphate/D-fructose 6-phosphate phosphoketolase from Acaryochloris marina MBIC11017
R441	sll0745	2.7.1.11	ATP_[cyt] + Sedoheptulose 7-phosphate_[cyt] => ADP_[cyt] + Sedoheptulose1,7-bisphosphate_[cyt]	R01843	C00002_[cyt] + C05382_[cyt] => C00008_[cyt] + C00447_[cyt]	Pentose phosphate pathway & Calvin-Benson Cycle	A
R442	sll1196	2.7.1.11	ATP_[cyt] + Sedoheptulose 7-phosphate_[cyt] => ADP_[cyt] + Sedoheptulose1,7-bisphosphate_[cyt]	R01843	C00002_[cyt] + C05382_[cyt] => C00008_[cyt] + C00447_[cyt]	Pentose phosphate pathway & Calvin-Benson Cycle	A
R443	-	-	1 Photon_[ext] => 1 Photon_[tlm]	-	E1_[ext] => E1_[tlm]	Photosynthesis and Respiratory Chain	-	Photon input
R444	-	-	1 Photon_[tlm] => 1 Photon_P680_[tlm]	-	E1_[tlm] => E1_P680_[tlm]	Photosynthesis and Respiratory Chain	-
R445	-	-	1 Photon_[tlm] => 1 Photon_P700_[tlm]	-	E1_[tlm] => E1_P700_[tlm]	Photosynthesis and Respiratory Chain	-
R446	slr1281, sll1732, sll0520, sll0027, ssr1386, slr0844, sll0223, sll1733, sll0522, sll0519, slr1291, slr0331, sll0521, sll0026, slr1279, slr0261, slr1280, slr1623, sll1262, slr2007, slr2009, ssl0352	1.6.5.3	NADPH_[cyt] + 5 H+_[cyt] + PQ_[tlm] => NADP+_[cyt] + PQH2_[tlm] + 4 H+_[tll]	-	C00005_[cyt] + 5 C00080_[cyt] + C10385_[tlm] => C00006_[cyt] + C16695_[tlm] + 4 C00080_[tll]	Photosynthesis and Respiratory Chain	-	cyclic electron flow at PSI; Mi et al. 1992;Ogawa and Mi 2007; Battchikova 2011
R447	slr1281, sll0520, ssr1386, slr0844, sll0223, sll0522, sll0519, slr1291, slr0331, sll0521, slr1279, slr0261, slr1280, slr1623, sll1262, slr2007, slr2009, ssl0352	1.6.5.3	NADPH_[cyt] + 5 H+_[cyt] + PQ_[cym] => NADP+_[cyt] + PQH2_[cym] + 4 H+_[pps]	-	C00005_[cyt] + 5 C00080_[cyt] + C10385_[cym] => C00006_[cyt] + C16695_[cym] + 4 C00080_[pps]	Photosynthesis and Respiratory Chain	A	NADPH I Dehydrogenase. NADPH is preferred (Cooley and Vermaas 2001)
R448	slr1281, sll1732, sll0520, sll0027, ssr1386, slr0844, sll0223, sll1733, sll1734, sll0522, sll0519, slr1291, slr0331, sll0521, sll0026, slr1279, slr0261, slr1280, slr1623, sll1262, slr2007, slr2009, ssl0352, slr1302	1.6.5.3	NADPH_[cyt] + 4 H+_[cyt] + PQ_[tlm] + H2O_[cyt] + CO2_[tll] => NADP+_[cyt] + PQH2_[tlm] + 4 H+_[tll] + HCO3-_[cyt]	-	C00005_[cyt] + 4 C00080_[cyt] + C10385_[tlm] + C00001_[cyt] + C00011_[tll] => C00006_[cyt] + C16695_[tlm] + 4 C00080_[tll] + C00288_[cyt]	Photosynthesis and Respiratory Chain	A	NADPH I Dehydrogenase. NADPH is preferred (Cooley and Vermaas 2001)
R449	slr1281, sll1732, sll0520, sll0027, ssr1386, slr0844, sll0223, sll1733, sll1734, sll0522, sll0519, slr1291, slr0331, sll0521, sll0026, slr1279, slr0261, slr1280, slr1623, sll1262, slr2007, slr2009, ssl0352, slr1302	1.6.5.3	NADPH_[cyt] + 4 H+_[cyt] + PQ_[cym] + H2O_[cyt] + CO2_[pps] => NADP+_[cyt] + PQH2_[cym] + 4 H+_[pps] + HCO3-_[cyt]	-	C00005_[cyt] + 4 C00080_[cyt] + C10385_[cym] + C00001_[cyt] + C00011_[pps] => C00006_[cyt] + C16695_[cym] + 4 C00080_[pps] + C00288_[cyt]	Photosynthesis and Respiratory Chain	A	NADPH I Dehydrogenase. NADPH is preferred (Cooley and Vermaas 2001)
R450	sll1484	1.6.99.3	NADH_[cyt] + H+_[cyt] + PQ_[tlm] => NAD+_[cyt] + PQH2_[tlm]	-	C00004_[cyt] + C10385_[tlm] + C00080_[cyt] => C00003_[cyt] + C16695_[tlm]	Photosynthesis and Respiratory Chain	A	NADH II Dehydrogenase, no proton pumping (Cooley and Vermaas 2001), NADH is preferred (Melo et al. 2004)
R451	slr0851	1.6.99.3	NADH_[cyt] + H+_[cyt] + PQ_[tlm] => NAD+_[cyt] + PQH2_[tlm]	-	C00004_[cyt] + C10385_[tlm] + C00080_[cyt] => C00003_[cyt] + C16695_[tlm]	Photosynthesis and Respiratory Chain	A	NADH II Dehydrogenase, no proton pumping (Cooley and Vermaas 2001), NADH is preferred (Melo et al. 2004)
R452	slr1743	1.6.99.3	NADH_[cyt] + H+_[cyt] + PQ_[tlm] => NAD+_[cyt] + PQH2_[tlm]	-	C00004_[cyt] + C10385_[tlm] + C00080_[cyt] => C00003_[cyt] + C16695_[tlm]	Photosynthesis and Respiratory Chain	A	NADH II Dehydrogenase, no proton pumping (Cooley and Vermaas 2001), NADH is preferred (Melo et al. 2004)
R453	sll1484	1.6.99.3	NADH_[cyt] + H+_[cyt] + PQ_[cym] => NAD+_[cyt] + PQH2_[cym]	-	C00004_[cyt] + C10385_[cym] + C00080_[cyt] => C00003_[cyt] + C16695_[cym]	Photosynthesis and Respiratory Chain	A	NADH II Dehydrogenase, no proton pumping (Cooley and Vermaas 2001), NADH is preferred (Melo et al. 2004)
R454	slr0851	1.6.99.3	NADH_[cyt] + H+_[cyt] + PQ_[cym] => NAD+_[cyt] + PQH2_[cym]	-	C00004_[cyt] + C10385_[cym] + C00080_[cyt] => C00003_[cyt] + C16695_[cym]	Photosynthesis and Respiratory Chain	A	NADH II Dehydrogenase, no proton pumping (Cooley and Vermaas 2001), NADH is preferred (Melo et al. 2004)
R455	slr1743	1.6.99.3	NADH_[cyt] + H+_[cyt] + PQ_[cym] => NAD+_[cyt] + PQH2_[cym]	-	C00004_[cyt] + C10385_[cym] + C00080_[cyt] => C00003_[cyt] + C16695_[cym]	Photosynthesis and Respiratory Chain	A	NADH II Dehydrogenase, no proton pumping (Cooley and Vermaas 2001), NADH is preferred (Melo et al. 2004)
R456	sll0813, slr2082, slr2083	1.9.3.1	4 Reduced plastocyanin_[tll] + Oxygen_[cyt] + 8 H+_[cyt] => 4 Oxidized plastocyanin_[tll] + 4 H+_[tll] + 2 H2O_[cyt]	-	4 C03025_[tll] + C00007_[cyt] + 8 C00080_[cyt] => 4 C03162_[tll] + 4 C00080_[tll] + 2 C00001_[cyt]	Photosynthesis and Respiratory Chain	A
R457	slr1136, slr1137, slr1138	1.9.3.1	4 Reduced plastocyanin_[tll] + Oxygen_[cyt] + 8 H+_[cyt] => 4 Oxidized plastocyanin_[tll] + 4 H+_[tll] + 2 H2O_[cyt]	-	4 C03025_[tll] + C00007_[cyt] + 8 C00080_[cyt] => 4 C03162_[tll] + 4 C00080_[tll] + 2 C00001_[cyt]	Photosynthesis and Respiratory Chain	A
R458	sll0813, slr2082, slr2083	1.9.3.1	4 Reduced plastocyanin_[pps] + Oxygen_[cyt] + 8 H+_[cyt] => 4 Oxidized plastocyanin_[pps] + 4 H+_[pps] + 2 H2O_[cyt]	-	4 C03025_[pps] + C00007_[cyt] + 8 C00080_[cyt] => 4 C03162_[pps] + 4 C00080_[pps] + 2 C00001_[cyt]	Photosynthesis and Respiratory Chain	A
R459	slr1136, slr1137, slr1138	1.9.3.1	4 Reduced plastocyanin_[pps] + Oxygen_[cyt] + 8 H+_[cyt] => 4 Oxidized plastocyanin_[pps] + 4 H+_[pps] + 2 H2O_[cyt]	-	4 C03025_[pps] + C00007_[cyt] + 8 C00080_[cyt] => 4 C03162_[pps] + 4 C00080_[pps] + 2 C00001_[cyt]	Photosynthesis and Respiratory Chain	A
R460	slr1379, slr1380	1.10.3.-	2 PQH2_[tlm] + Oxygen_[cyt] + 4 H+_[cyt] => 2 PQ_[tlm] + 4 H+_[tll] + 2 H2O_[cyt]	-	2 C16695_[tlm] + C00007_[cyt] + 4 C00080_[cyt] => 2 C10385_[tlm] + 4 C00080_[tll] + 2 C00001_[cyt]	Photosynthesis and Respiratory Chain	A
R461	slr1379, slr1380	1.10.3.-	2 PQH2_[cym] + Oxygen_[cyt] + 4 H+_[cyt] => 2 PQ_[cym] + 4 H+_[pps] + 2 H2O_[cyt]	-	2 C16695_[cym] + C00007_[cyt] + 4 C00080_[cyt] => 2 C10385_[cym] + 4 C00080_[pps] + 2 C00001_[cyt]	Photosynthesis and Respiratory Chain	A
R462	sll1182, sll1316, sll1317, slr0342, slr0343, slr1185, sml0004, smr0003, smr0010, sll1796	1.10.99.1	PQH2_[tlm] + 2 Oxidized plastocyanin_[tll] => PQ_[tlm] + 2 Reduced plastocyanin_[tll] + 2 H+_[tll]	-	C16695_[tlm] + 2 C03162_[tll] => C10385_[tlm] + 2 C00080_[tll] + 2 C03025_[tll]	Photosynthesis and Respiratory Chain	A
R463	sll1182, sll1316, sll1317, slr0342, slr0343, slr1185, sml0004, smr0003, smr0010, sll1796	1.10.99.1	PQH2_[cym] + 2 Oxidized plastocyanin_[pps] => PQ_[cym] + 2 Reduced plastocyanin_[pps] + 2 H+_[pps]	-	C16695_[cym] + 2 C03162_[pps] => C10385_[cym] + 2 C00080_[pps] + 2 C03025_[pps]	Photosynthesis and Respiratory Chain	A
R464	sll1182, sll1316, sll1317, slr0342, slr0343, slr1185, sml0004, smr0003, smr0010, sll1796	1.10.99.1	PQH2_[tlm] + 1 Oxidized rieske_B6_[tlm] => PQH_B6_L_[tlm] + 1 Reduced rieske_B6_[tlm] + 1 H+_[tll]	-	C16695_[tlm] + 1 ORieske_B6_[tlm] => PQH_B6_L_[tlm] + 1 RRieske_B6_[tlm] + 1 C00080_[tll]	Photosynthesis and Respiratory Chain	A
R465	sll1182, sll1316, sll1317, slr0342, slr0343, slr1185, sml0004, smr0003, smr0010, sll1796	1.10.99.1	1 Reduced rieske_B6_[tlm] + 1 Oxidized plastocyanin_[tll] => 1 Oxidized rieske_B6_[tlm] + 1 Reduced plastocyanin_[tll]	-	1 RRieske_B6_[tlm] + 1 C03162_[tll] => 1 C03025_[tll] + 1 ORieske_B6_[tlm]	Photosynthesis and Respiratory Chain	A
R466	sll1182, sll1316, sll1317, slr0342, slr0343, slr1185, sml0004, smr0003, smr0010, sll1796	1.10.99.1	PQH_B6_L_[tlm] + 1 HB3p_B6_[tlm] => PQ_B6_S_[tlm] + 1 HB2p_B6_[tlm] + 1 H+_[tll]	-	PQH_B6_L_[tlm] + 1 HB3p_B6_[tlm] => 1 C10385_B6_S_[tlm] + 1 C00080_[tll] + 1 HB2p_B6_[tlm]	Photosynthesis and Respiratory Chain	A
R467	sll1182, sll1316, sll1317, slr0342, slr0343, slr1185, sml0004, smr0003, smr0010, sll1796	1.10.99.1	PQ_B6_S_[tlm] => PQ_[tlm]	-	1 C10385_B6_S_[tlm] => 1 C10385_[tlm]	Photosynthesis and Respiratory Chain	A
R468	sll1182, sll1316, sll1317, slr0342, slr0343, slr1185, sml0004, smr0003, smr0010, sll1796	1.10.99.1	PQ_B6_S_[tlm] + 1 HB2p_B6_[tlm] + 1 H+_[cyt] => PQH_B6_S_[tlm] + 1 HB3p_B6_[tlm]	-	1 C10385_B6_S_[tlm] + 1 HB2p_B6_[tlm] + 1 C00080_[cyt] => 1 PQH_B6_S_[tlm] + 1 HB3p_B6_[tlm]	Photosynthesis and Respiratory Chain	A
R469	sll1182, sll1316, sll1317, slr0342, slr0343, slr1185, sml0004, smr0003, smr0010, sll1796	1.10.99.1	PQH_B6_S_[tlm] + 1 HB2p_B6_[tlm] + 1 H+_[cyt] => PQH2_[tlm] + 1 HB3p_B6_[tlm]	-	1 PQH_B6_S_[tlm] + 1 HB2p_B6_[tlm] + 1 C00080_[cyt] => C16695_[tlm] + 1 HB3p_B6_[tlm]	Photosynthesis and Respiratory Chain	A
R470	sll1182, sll1316, sll1317, slr0342, slr0343, slr1185, sml0004, smr0003, smr0010, sll1796	1.10.99.1	PQH2_[cym] + 1 Oxidized rieske_B6_[cym] => PQH_B6_L_[cym] + 1 Reduced rieske_B6_[cym] + 1 H+_[pps]	-	C16695_[cym] + 1 ORieske_B6_[cym] => PQH_B6_L_[cym] + 1 RRieske_B6_[cym] + 1 C00080_[pps]	Photosynthesis and Respiratory Chain	A
R471	sll1182, sll1316, sll1317, slr0342, slr0343, slr1185, sml0004, smr0003, smr0010, sll1796	1.10.99.1	1 Reduced rieske_B6_[cym] + 1 Oxidized plastocyanin_[pps] => 1 Oxidized rieske_B6_[cym] + 1 Reduced plastocyanin_[pps]	-	1 RRieske_B6_[cym] + 1 C03162_[pps] => 1 C03025_[pps] + 1 ORieske_B6_[cym]	Photosynthesis and Respiratory Chain	A
R472	sll1182, sll1316, sll1317, slr0342, slr0343, slr1185, sml0004, smr0003, smr0010, sll1796	1.10.99.1	PQH_B6_L_[cym] + 1 HB3p_B6_[cym] => PQ_B6_S_[cym] + 1 HB2p_B6_[cym] + 1 H+_[pps]	-	PQH_B6_L_[cym] + 1 HB3p_B6_[cym] => 1 C10385_B6_S_[cym] + 1 C00080_[pps] + 1 HB2p_B6_[cym]	Photosynthesis and Respiratory Chain	A
R473	sll1182, sll1316, sll1317, slr0342, slr0343, slr1185, sml0004, smr0003, smr0010, sll1796	1.10.99.1	PQ_B6_S_[cym] => PQ_[cym]	-	1 C10385_B6_S_[cym] => 1 C10385_[cym]	Photosynthesis and Respiratory Chain	A
R474	sll1182, sll1316, sll1317, slr0342, slr0343, slr1185, sml0004, smr0003, smr0010, sll1796	1.10.99.1	PQ_B6_S_[cym] + 1 HB2p_B6_[cym] + 1 H+_[cyt] => PQH_B6_S_[cym] + 1 HB3p_B6_[cym]	-	1 C10385_B6_S_[cym] + 1 HB2p_B6_[cym] + 1 C00080_[cyt] => 1 PQH_B6_S_[cym] + 1 HB3p_B6_[cym]	Photosynthesis and Respiratory Chain	A
R475	sll1182, sll1316, sll1317, slr0342, slr0343, slr1185, sml0004, smr0003, smr0010, sll1796	1.10.99.1	PQH_B6_S_[cym] + 1 HB2p_B6_[cym] + 1 H+_[cyt] => PQH2_[cym] + 1 HB3p_B6_[cym]	-	1 PQH_B6_S_[cym] + 1 HB2p_B6_[cym] + 1 C00080_[cyt] => C16695_[cym] + 1 HB3p_B6_[cym]	Photosynthesis and Respiratory Chain	A
R476	sll0226, sll0629, sll0634, sll0819, slr0171, slr0737, slr0823, slr0823, slr1655, slr1834, slr1835, sml0008, smr0004, smr0005, ssl0563, ssr0390, ssr2831, ssr2016	-	1 Photon_P700_[tlm] + 1 P700_[tlm] + 1 Oxidized ferredoxin_[cyt] => 1 P700p_[tlm] + 1 Reduced ferredoxin_[cyt]	-	E1_P700_[tlm] + C00139_[cyt] + P700_[tlm] => C00138_[cyt] + P700p_[tlm]	Photosynthesis and Respiratory Chain	A	PSI
R477	sll0226, sll0629, sll0634, sll0819, slr0171, slr0737, slr0823, slr0823, slr1655, slr1834, slr1835, sml0008, smr0004, smr0005, ssl0563, ssr0390, ssr2831, ssr2016	-	1 P700p_[tlm] + 1 Reduced plastocyanin_[tll] => 1 Oxidized plastocyanin_[tll] + 1 P700_[tlm]	-	P700p_[tlm] + C03025_[tll] => C03162_[tll] + P700_[tlm]	Photosynthesis and Respiratory Chain	A	PSI
R478	slr1643	1.18.1.2	2 Reduced ferredoxin_[cyt] + NADP+_[cyt] + H+_[cyt] <=> 2 Oxidized ferredoxin_[cyt] + NADPH_[cyt]	R01195	2 C00138_[cyt] + C00006_[cyt] + C00080_[cyt] <=> 2 C00139_[cyt] + C00005_[cyt]	Photosynthesis and Respiratory Chain	A
R479	sll0554, ssr0330	1.8.7.2	2 Reduced ferredoxin_[cyt] + Thioredoxin disulfide_[cyt] + 2 H+_[cyt] <=> 2 Oxidized ferredoxin_[cyt] + Thioredoxin_[cyt]	-	2 C00138_[cyt] + C00343_[cyt] + 2 C00080_[cyt] <=> 2 C00139_[cyt] + C00342_[cyt]	Photosynthesis and Respiratory Chain	A	FTR, ferredoxin:thioredoxin reductase
R480	sll0226, sll0629, sll0634, sll0819, slr0171, slr0737, slr0823, slr0823, slr1655, slr1834, slr1835, sml0008, smr0004, smr0005, ssl0563, ssr0390, ssr2831	-	1 Photon_P700_[tlm] + 1 P700_[tlm] + 1 Oxygen_[cyt] => 1 P700p_[tlm] + 1 Superoxide anion_[cyt]	-	E1_P700_[tlm] + 1 P700_[tlm] + 1 C00007_[cyt] => 1 P700p_[tlm] + 1 C00704_[cyt]	Photosynthesis and Respiratory Chain	-	Mehler reaction at PSI
R481	sll0550, sll1521	-	2 NADPH_[cyt] + 2 H+_[cyt] + Oxygen_[cyt] => 2 NADP+_[cyt] + 2 H2O_[cyt]	-	2 C00005_[cyt] + 2 C00080_[cyt] + C00007_[cyt] => 2 C00006_[cyt] + 2 C00001_[cyt]	Photosynthesis and Respiratory Chain	-	Mehler-like reaction; Allahverdiyeva et al. 2011
R482	sll0258, sll0427, sll0849, sll0851, sll1194, sll1398, sll1418, sll1867, slr0906, slr0927, slr1181, slr1311, slr1645, slr1739, slr2034, sml0001, sml0002, sml0003, sml0005, sml0007, smr0001, smr0006, smr0007, smr0008, smr0009, ssl2598, ssr3451, sll0217, sll	-	1 Oxygen_[cyt] + 1 QAn_P680_[tlm] => 1 Superoxide anion_[cyt] + 1 QA_P680_[tlm]	-	1 C00007_[cyt] + 1 QAn_P680_[tlm] => 1 C00704_[cyt] + 1 QA_P680_[tlm]	Photosynthesis and Respiratory Chain	-	ROS evolution at PSII
R483	slr1281, sll1732, sll0520, ssr1386, slr0844, sll0223, sll1733, sll0522, sll0519, slr1291, slr0331, sll0521, slr1279, slr0261, slr1280, slr1623, sll1262, slr2007, slr2009, ssl0352	1.6.5.3	NADPH_[cyt] + 5 H+_[cyt] + PQ_[tlm] => NADP+_[cyt] + PQH2_[tlm] + 4 H+_[tll]	-	C00005_[cyt] + 5 C00080_[cyt] + C10385_[tlm] => C00006_[cyt] + C16695_[tlm] + 4 C00080_[tll]	Photosynthesis and Respiratory Chain	A	NADPH I Dehydrogenase. NADPH is preferred (Cooley and Vermaas 2001)
R484	sll0258, sll0427, sll0849, sll0851, sll1194, sll1398, sll1418, sll1867, slr0906, slr0927, slr1181, slr1311, slr1645, slr1739, slr2034, sml0001, sml0002, sml0003, sml0005, sml0007, smr0001, smr0006, smr0007, smr0008, smr0009, ssl2598, ssr3451, sll0217, sll0219	-	1 Photon_680_[tlm] + 1 P680_[tlm] + 1 QA_P680_[tlm] => 1 P680p_[tlm] + 1 QAn_P680_[tlm]	-	1 E1_P680_[tlm] + 1 P680_[tlm] + 1 QA_P680_[tlm] => 1 P680p_[tlm] + 1 QAn_P680_[tlm]	Photosynthesis and Respiratory Chain	A	PS2
R485	sll0258, sll0427, sll0849, sll0851, sll1194, sll1398, sll1418, sll1867, slr0906, slr0927, slr1181, slr1311, slr1645, slr1739, slr2034, sml0001, sml0002, sml0003, sml0005, sml0007, smr0001, smr0006, smr0007, smr0008, smr0009, ssl2598, ssr3451, sll0217, sll0219	-	1 PQ_[tlm] + 1 QAn_P680_[tlm] + H+_[cyt] => 1 PQn_P680_[tlm] + 1 QA_P680_[tlm]	-	1 C10385_[tlm] + 1 QAn_P680_[tlm] + C00080_[cyt] => 1 PQn_P680_[tlm] + 1 QA_P680_[tlm]	Photosynthesis and Respiratory Chain	A	PS2
R486	sll0258, sll0427, sll0849, sll0851, sll1194, sll1398, sll1418, sll1867, slr0906, slr0927, slr1181, slr1311, slr1645, slr1739, slr2034, sml0001, sml0002, sml0003, sml0005, sml0007, smr0001, smr0006, smr0007, smr0008, smr0009, ssl2598, ssr3451, sll0217, sll0219	-	1 PQn_P680_[tlm] + 1 QAn_P680_[tlm] + H+_[cyt] => 1 PQH2_[tlm] + 1 QA_P680_[tlm]	-	1 PQn_P680_[tlm] + 1 QAn_P680_[tlm] + C00080_[cyt] => 1 C16695_[tlm] + 1 QA_P680_[tlm]	Photosynthesis and Respiratory Chain	A	PS2
R487	sll0258, sll0427, sll0849, sll0851, sll1194, sll1398, sll1418, sll1867, slr0906, slr0927, slr1181, slr1311, slr1645, slr1739, slr2034, sml0001, sml0002, sml0003, sml0005, sml0007, smr0001, smr0006, smr0007, smr0008, smr0009, ssl2598, ssr3451, sll0217, sll0219	-	1 P680p_[tlm] + 1 S0_P680_[tlm] => 1 P680_[tlm] + 1 S1_P680_[tlm]	-	1 P680p_[tlm] + 1 S0_P680_[tlm] => 1 P680_[tlm] + 1 S1_P680_[tlm]	Photosynthesis and Respiratory Chain	A	PS2
R488	sll0258, sll0427, sll0849, sll0851, sll1194, sll1398, sll1418, sll1867, slr0906, slr0927, slr1181, slr1311, slr1645, slr1739, slr2034, sml0001, sml0002, sml0003, sml0005, sml0007, smr0001, smr0006, smr0007, smr0008, smr0009, ssl2598, ssr3451, sll0217, sll0219	-	1 P680p_[tlm] + 1 S1_P680_[tlm] => 1 P680_[tlm] + 1 S2_P680_[tlm]	-	P680p_[tlm] + 1 S1_P680_[tlm] => 1 P680_[tlm] + 1 S2_P680_[tlm]	Photosynthesis and Respiratory Chain	A	PS2
R489	sll0258, sll0427, sll0849, sll0851, sll1194, sll1398, sll1418, sll1867, slr0906, slr0927, slr1181, slr1311, slr1645, slr1739, slr2034, sml0001, sml0002, sml0003, sml0005, sml0007, smr0001, smr0006, smr0007, smr0008, smr0009, ssl2598, ssr3451, sll0217, sll0219	-	1 P680p_[tlm] + 1 S2_P680_[tlm] => 1 P680_[tlm] + 1 S3_P680_[tlm]	-	1 P680p_[tlm] + 1 S2_P680_[tlm] => 1 P680_[tlm] + 1 S3_P680_[tlm]	Photosynthesis and Respiratory Chain	A	PS2
R490	sll0258, sll0427, sll0849, sll0851, sll1194, sll1398, sll1418, sll1867, slr0906, slr0927, slr1181, slr1311, slr1645, slr1739, slr2034, sml0001, sml0002, sml0003, sml0005, sml0007, smr0001, smr0006, smr0007, smr0008, smr0009, ssl2598, ssr3451, sll0217, sll0219	-	1 P680p_[tlm] + 1 S3_P680_[tlm] => 1 P680_[tlm] + 1 S4_P680_[tlm]	-	1 P680p_[tlm] + 1 S3_P680_[tlm] => 1 P680_[tlm] + 1 S4_P680_[tlm]	Photosynthesis and Respiratory Chain	A	PS2
R491	sll0258, sll0427, sll0849, sll0851, sll1194, sll1398, sll1418, sll1867, slr0906, slr0927, slr1181, slr1311, slr1645, slr1739, slr2034, sml0001, sml0002, sml0003, sml0005, sml0007, smr0001, smr0006, smr0007, smr0008, smr0009, ssl2598, ssr3451, sll0217, sll0219	-	1 S4_P680_[tlm] + 2 H2O_[tll] => 1 S0_P680_[tlm] + Oxygen_[tll] + 4 H+_[tll]	-	1 S4_P680_[tlm] + 2 C00001_[tll] => 1 S0_P680_[tlm] + C00007_[tll] + 4 C00080_[tll]	Photosynthesis and Respiratory Chain	A	PS2
R492	sll1327, sll1323, sll1322, ssl2615, sll1324, sll1325, sll1326, slr1329, slr1330	3.6.3.14	14 H+_[tll] + 3 ADP_[cyt] + 3 Orthophosphate_[cyt] => 3 ATP_[cyt] + 3 H2O_[cyt] + 14 H+_[cyt]	-	14 C00080_[tll] + 3 C00008_[cyt] + 3 C00009_[cyt] => 3 C00002_[cyt] + 3 C00001_[cyt] + 14 C00080_[cyt]	Photosynthesis and Respiratory Chain	A	ATPase
R493	sll1327, sll1323, sll1322, ssl2615, sll1324, sll1325, sll1326, slr1329, slr1330	3.6.3.14	14 H+_[pps] + 3 ADP_[cyt] + 3 Orthophosphate_[cyt] => 3 ATP_[cyt] + 3 H2O_[cyt] + 14 H+_[cyt]	-	14 C00080_[pps] + 3 C00008_[cyt] + 3 C00009_[cyt] => 3 C00002_[cyt] + 3 C00001_[cyt] + 14 C00080_[cyt]	Photosynthesis and Respiratory Chain	A	ATPase
R494	sll0587	2.7.1.40	ATP_[cyt] + Pyruvate_[cyt] <= ADP_[cyt] + Phosphoenolpyruvate_[cyt]	R00200	C00002_[cyt] + C00022_[cyt] <= C00008_[cyt] + C00074_[cyt]	Pyruvate and TCA	A
R495	sll1275	2.7.1.40	ATP_[cyt] + Pyruvate_[cyt] <= ADP_[cyt] + Phosphoenolpyruvate_[cyt]	R00200	C00002_[cyt] + C00022_[cyt] <= C00008_[cyt] + C00074_[cyt]	Pyruvate and TCA	A
R496	slr1096	1.8.1.4	Pyruvate_[cyt] + CoA_[cyt] + NAD+_[cyt] => Acetyl-CoA_[cyt] + CO2_[cyt] + NADH_[cyt] + H+_[cyt]	R00209	C00022_[cyt] + C00010_[cyt] + C00003_[cyt] => C00024_[cyt] + C00011_[cyt] + C00004_[cyt] + C00080_[cyt]	Pyruvate and TCA	A
R497	sll1721, slr1934	1.2.4.1	Pyruvate_[cyt] + CoA_[cyt] + NAD+_[cyt] => Acetyl-CoA_[cyt] + CO2_[cyt] + NADH_[cyt] + H+_[cyt]	R00209	C00022_[cyt] + C00010_[cyt] + C00003_[cyt] => C00024_[cyt] + C00011_[cyt] + C00004_[cyt] + C00080_[cyt]	Pyruvate and TCA	A
R498	sll1841	2.3.1.12	Pyruvate_[cyt] + CoA_[cyt] + NAD+_[cyt] => Acetyl-CoA_[cyt] + CO2_[cyt] + NADH_[cyt] + H+_[cyt]	R00209	C00022_[cyt] + C00010_[cyt] + C00003_[cyt] => C00024_[cyt] + C00011_[cyt] + C00004_[cyt] + C00080_[cyt]	Pyruvate and TCA	A
R499	sll0542	6.2.1.1	ATP_[cyt] + Acetate_[cyt] + CoA_[cyt] => AMP_[cyt] + Diphosphate_[cyt] + Acetyl-CoA_[cyt]	R00235	C00002_[cyt] + C00033_[cyt] + C00010_[cyt] => C00020_[cyt] + C00013_[cyt] + C00024_[cyt]	Pyruvate and TCA	A
R500	slr0091	1.2.1.3	Acetaldehyde_[cyt] + NAD+_[cyt] + H2O_[cyt] <= Acetate_[cyt] + NADH_[cyt] + H+_[cyt]	R00710	C00084_[cyt] + C00003_[cyt] + C00001_[cyt] <= C00033_[cyt] + C00004_[cyt] + C00080_[cyt]	Pyruvate and TCA	A
R501	sll0990	1.1.1.1	Ethanol_[cyt] + NAD+_[cyt] <= Acetaldehyde_[cyt] + NADH_[cyt] + H+_[cyt]	R00754	C00469_[cyt] + C00003_[cyt] <= C00084_[cyt] + C00004_[cyt] + C00080_[cyt]	Pyruvate and TCA	A
R502	slr0942	1.1.1.2	Ethanol_[cyt] + NADP+_[cyt] <= Acetaldehyde_[cyt] + NADPH_[cyt] + H+_[cyt]	R00746	C00469_[cyt] + C00006_[cyt] <= C00084_[cyt] + C00005_[cyt] + C00080_[cyt]	Pyruvate and TCA	A
R503	sll0920	4.1.1.31	Orthophosphate_[cyt] + Oxaloacetate_[cyt] <= Phosphoenolpyruvate_[cyt] + HCO3-_[cyt] + H+_[cyt]	-	C00009_[cyt] + C00036_[cyt] <= C00074_[cyt] + C00288_[cyt] + C00080_[cyt]	Pyruvate and TCA	A	Better affinity for bicarbonate instead of CO2
R504	sll0891	1.1.1.37	(S)-Malate_[cyt] + NAD+_[cyt] <=> Oxaloacetate_[cyt] + NADH_[cyt] + H+_[cyt]	R00342	C00149_[cyt] + C00003_[cyt] <=> C00036_[cyt] + C00004_[cyt] + C00080_[cyt]	Pyruvate and TCA	A
R505	sll0402	2.6.1.1	L-Aspartate_[cyt] + 2-Oxoglutarate_[cyt] <=> Oxaloacetate_[cyt] + L-Glutamate_[cyt]	R00355	C00049_[cyt] + C00026_[cyt] <=> C00036_[cyt] + C00025_[cyt]	Pyruvate and TCA	A
R506	slr0301	2.7.9.2	ATP_[cyt] + Pyruvate_[cyt] + H2O_[cyt] => AMP_[cyt] + Phosphoenolpyruvate_[cyt] + Orthophosphate_[cyt]	R00199	C00002_[cyt] + C00022_[cyt] + C00001_[cyt] => C00020_[cyt] + C00074_[cyt] + C00009_[cyt]	Pyruvate and TCA	A
R507	sll1682	1.4.1.1	L-Alanine_[cyt] + NAD+_[cyt] + H2O_[cyt] <=> Pyruvate_[cyt] + NH3_[cyt] + NADH_[cyt] + H+_[cyt]	R00396	C00041_[cyt] + C00003_[cyt] + C00001_[cyt] <=> C00022_[cyt] + C00014_[cyt] + C00004_[cyt] + C00080_[cyt]	Pyruvate and TCA	A
R508	slr0665	4.2.1.3	Citrate_[cyt] <=> cis-Aconitate_[cyt] + H2O_[cyt]	R01325	C00158_[cyt] <=> C00417_[cyt] + C00001_[cyt]	Pyruvate and TCA	A
R509	slr0665	4.2.1.3	Isocitrate_[cyt] <=> cis-Aconitate_[cyt] + H2O_[cyt]	R01900	C00311_[cyt] <=> C00417_[cyt] + C00001_[cyt]	Pyruvate and TCA	A
R510	slr1289	1.1.1.42	Isocitrate_[cyt] + NADP+_[cyt] => 2-Oxoglutarate_[cyt] + CO2_[cyt] + NADPH_[cyt] + H+_[cyt]	R00267	C00311_[cyt] + C00006_[cyt] => C00026_[cyt] + C00011_[cyt] + C00005_[cyt] + C00080_[cyt]	Pyruvate and TCA	A
R511	sll1023, sll1557	6.2.1.5	ATP_[cyt] + Succinate_[cyt] + CoA_[cyt] <=> ADP_[cyt] + Orthophosphate_[cyt] + Succinyl-CoA_[cyt]	R00405	C00002_[cyt] + C00042_[cyt] + C00010_[cyt] <=> C00008_[cyt] + C00009_[cyt] + C00091_[cyt]	Pyruvate and TCA	A
R512	slr0018	4.2.1.2	(S)-Malate_[cyt] <=> Fumarate_[cyt] + H2O_[cyt]	R01082	C00149_[cyt] <=> C00122_[cyt] + C00001_[cyt]	Pyruvate and TCA	A
R513	sll0823, sll1625, slr1233	1.3.99.1	Succinate_[cyt] + PQ_[tlm] => PQH2_[tlm] + Fumarate_[cyt]	-	C00042_[cyt] + C10385_[tlm] => C16695_[tlm] + C00122_[cyt]	Pyruvate and TCA	A
R514	sll0823, sll1625, slr1233	1.3.99.1	Succinate_[cyt] + PQ_[cym] => PQH2_[cym] + Fumarate_[cyt]	-	C00042_[cyt] + C10385_[cym] => C16695_[cym] + C00122_[cyt]	Pyruvate and TCA	A
R515	sll0401	2.3.3.1	Citrate_[cyt] + CoA_[cyt] <= Acetyl-CoA_[cyt] + H2O_[cyt] + Oxaloacetate_[cyt]	R00351	C00158_[cyt] + C00010_[cyt] <= C00024_[cyt] + C00001_[cyt] + C00036_[cyt]	Pyruvate and TCA	A
R516	slr1556	1.1.1.28	(R)-Lactate_[cyt] + NAD+_[cyt] <=> Pyruvate_[cyt] + NADH_[cyt] + H+_[cyt]	R00704	C00256_[cyt] + C00003_[cyt] <=> C00022_[cyt] + C00004_[cyt] + C00080_[cyt]	Pyruvate and TCA	A
R517	slr0721	1.1.1.38	(S)-Malate_[cyt] + NADP+_[cyt] => Pyruvate_[cyt] + CO2_[cyt] + NADPH_[cyt] + H+_[cyt]	R00216	C00149_[cyt] + C00006_[cyt] => C00022_[cyt] + C00011_[cyt] + C00005_[cyt] + C00080_[cyt]	Pyruvate and TCA	A
R518	slr2132	2.3.1.8	Acetyl-CoA_[cyt] + Orthophosphate_[cyt] => CoA_[cyt] + Acetyl phosphate_[cyt]	R00230	C00024_[cyt] + C00009_[cyt] => C00010_[cyt] + C00227_[cyt]	Pyruvate and TCA	A
R519	sll1299	2.7.2.1	ATP_[cyt] + Acetate_[cyt] <=> ADP_[cyt] + Acetyl phosphate_[cyt]	R00315	C00002_[cyt] + C00033_[cyt] <=> C00008_[cyt] + C00227_[cyt]	Pyruvate and TCA	A
R520	sll1349	3.1.3.18	2-Phosphoglycolate_[cyt] + H2O_[cyt] => Glycolate_[cyt] + Orthophosphate_[cyt]	R01334	C00988_[cyt] + C00001_[cyt] => C00160_[cyt] + C00009_[cyt]	Pyruvate and TCA	A
R521	slr0458	3.1.3.18	2-Phosphoglycolate_[cyt] + H2O_[cyt] => Glycolate_[cyt] + Orthophosphate_[cyt]	R01334	C00988_[cyt] + C00001_[cyt] => C00160_[cyt] + C00009_[cyt]	Pyruvate and TCA	A
R522	slr1762	3.1.3.18	2-Phosphoglycolate_[cyt] + H2O_[cyt] => Glycolate_[cyt] + Orthophosphate_[cyt]	R01334	C00988_[cyt] + C00001_[cyt] => C00160_[cyt] + C00009_[cyt]	Pyruvate and TCA	A
R523	sll0741	1.2.7.1	2 Reduced ferredoxin_[cyt] + Acetyl-CoA_[cyt] + CO2_[cyt] + 2 H+_[cyt] <= 2 Oxidized ferredoxin_[cyt] + Pyruvate_[cyt] + CoA_[cyt]	R01196	2 C00138_[cyt] + C00024_[cyt] + C00011_[cyt] + 2 C00080_[cyt] <= 2 C00139_[cyt] + C00022_[cyt] + C00010_[cyt]	Pyruvate and TCA	C	BLAST search: 77 % identity, 1940 score and E-value 0 to pyruvate-flavodoxin oxidoreductase from Micorystis aeruginosa; flavodoxin replaced by ferredoxin
R524	sll1358	4.1.1.2	Oxalate_[cyt] => Formate_[cyt] + CO2_[cyt]	R00522	C00209_[cyt] => C00058_[cyt] + C00011_[cyt]	Pyruvate and TCA	A
R525	sll1359	1.2.2.1	Formate_[cyt] + 2 Ferricytochrome b1_[cyt] => CO2_[cyt] + 2 Ferrocytochrome b1_[cyt] + 2 H+_[cyt]	R03146	C00058_[cyt] + 2 C00995_[cyt] => C00011_[cyt] + 2 C00998_[cyt] + 2 C00080_[cyt]	Pyruvate and TCA	B	Eisenhut et al. 2008
R526	sll0631	1.4.3.16	L-Aspartate_[cyt] + H2O_[cyt] + Oxygen_[cyt] => Oxaloacetate_[cyt] + NH3_[cyt] + H2O2_[cyt]	R00357	C00049_[cyt] + C00001_[cyt] + C00007_[cyt] => C00036_[cyt] + C00014_[cyt] + C00027_[cyt]	Pyruvate and TCA	A
R527	sll1641	4.1.1.15	L-Glutamate_[cyt] => 4-Aminobutanoate_[cyt] + CO2_[cyt]	R00261	C00025_[cyt] => C00334_[cyt] + C00011_[cyt]	Pyruvate and TCA	A
R528	sll1981	4.1.1.71	2-Oxoglutarate_[cyt] => Succinate semialdehyde_[cyt] + CO2_[cyt]	R00272	C00026_[cyt] => C00232_[cyt] + C00011_[cyt]	Pyruvate and TCA	C	BLAST Search: identity 80%, score 911, E-value 0.0 to SYNPCC7002_A2770 to 2-Oxoglutarate decarboxylase; Zhang and Bryant 2011
R529	slr0370	1.2.1.16	Succinate semialdehyde_[cyt] + NADP+_[cyt] + H2O_[cyt] => Succinate_[cyt] + NADPH_[cyt] + H+_[cyt]	R00714	C00232_[cyt] + C00006_[cyt] + C00001_[cyt] => C00042_[cyt] + C00005_[cyt] + C00080_[cyt]	Pyruvate and TCA	A
R530	slr1022	2.6.1.19	4-Aminobutanoate_[cyt] + 2-Oxoglutarate_[cyt] <=> Succinate semialdehyde_[cyt] + L-Glutamate_[cyt]	R01648	C00334_[cyt] + C00026_[cyt] <=> C00232_[cyt] + C00025_[cyt]	Pyruvate and TCA	B	Schriek et al. 2007
R531	sll0404	1.1.99.14	Glycolate_[cyt] + NAD+_[cyt] => Glyoxylate_[cyt] + NADH_[cyt] + H+_[cyt]	R00476	C00160_[cyt] + C00003_[cyt] => C00048_[cyt] + C00004_[cyt] + C00080_[cyt]	Pyruvate and TCA	A	Eisenhut et al. 2008; NAD serves as electron acceptor
R532	slr0806	1.1.99.14	Glycolate_[cyt] + NAD+_[cyt] => Glyoxylate_[cyt] + NADH_[cyt] + H+_[cyt]	R00476	C00160_[cyt] + C00003_[cyt] => C00048_[cyt] + C00004_[cyt] + C00080_[cyt]	Pyruvate and TCA	A	Eisenhut et al. 2008; NAD serves as electron acceptor
R533	sll0757	2.4.2.14	5-Phosphoribosylamine_[cyt] + Diphosphate_[cyt] + L-Glutamate_[cyt] <= L-Glutamine_[cyt] + 5-Phospho-alpha-D-ribose 1-diphosphate_[cyt] + H2O_[cyt]	R01072	C03090_[cyt] + C00013_[cyt] + C00025_[cyt] <= C00064_[cyt] + C00119_[cyt] + C00001_[cyt]	Purine	A
R534	slr1159	6.3.4.13	ATP_[cyt] + 5-Phosphoribosylamine_[cyt] + Glycine_[cyt] => ADP_[cyt] + Orthophosphate_[cyt] + 5'-Phosphoribosylglycinamide_[cyt]	R04144	C00002_[cyt] + C03090_[cyt] + C00037_[cyt] => C00008_[cyt] + C00009_[cyt] + C03838_[cyt]	Purine	A
R535	slr0477	2.1.2.2	10-Formyltetrahydrofolate_[cyt] + 5'-Phosphoribosylglycinamide_[cyt] => Tetrahydrofolate_[cyt] + 5'-Phosphoribosyl-N-formylglycinamide_[cyt]	R04325	C00234_[cyt] + C03838_[cyt] => C00101_[cyt] + C04376_[cyt]	Purine	A
R536	slr0477	2.1.2.2	5'-Phosphoribosylglycinamide_[cyt] + 5,10-Methenyltetrahydrofolate_[cyt] + H2O_[cyt] => 5'-Phosphoribosyl-N-formylglycinamide_[cyt] + Tetrahydrofolate_[cyt]	R04326	C03838_[cyt] + C00445_[cyt] + C00001_[cyt] => C04376_[cyt] + C00101_[cyt] + C00080_[cyt]	Purine	A
R537	sll1056, slr0519, slr0520	6.3.5.3	ATP_[cyt] + 5'-Phosphoribosyl-N-formylglycinamide_[cyt] + L-Glutamine_[cyt] + H2O_[cyt] => ADP_[cyt] + Orthophosphate_[cyt] + 2-(Formamido)-N1-(5'-phosphoribosyl)acetamidine_[cyt] + L-Glutamate_[cyt]	R04463	C00002_[cyt] + C04376_[cyt] + C00064_[cyt] + C00001_[cyt] => C00008_[cyt] + C00009_[cyt] + C04640_[cyt] + C00025_[cyt]	Purine	A
R538	slr0838	6.3.3.1	ATP_[cyt] + 2-(Formamido)-N1-(5'-phosphoribosyl)acetamidine_[cyt] => ADP_[cyt] + Orthophosphate_[cyt] + Aminoimidazole ribotide_[cyt]	R04208	C00002_[cyt] + C04640_[cyt] => C00008_[cyt] + C00009_[cyt] + C03373_[cyt]	Purine	A
R539	sll0578	6.3.4.18	ATP_[cyt] + Aminoimidazole ribotide_[cyt] + HCO3-_[cyt] + H+_[cyt] => ADP_[cyt] + Orthophosphate_[cyt] + 5-Carboxyamino-1-(5-phospho-D-ribosyl)imidazole_[cyt]	R07404	C00002_[cyt] + C03373_[cyt] + C00288_[cyt] + C00080_[cyt] => C00008_[cyt] + C00009_[cyt] + C15667_[cyt]	Purine	A
R540	sll0901	5.4.99.18	5-Carboxyamino-1-(5-phospho-D-ribosyl)imidazole_[cyt] <=> 1-(5-Phospho-D-ribosyl)-5-amino-4-imidazolecarboxylate_[cyt]	R07405	C15667_[cyt] <=> C04751_[cyt]	Purine	A
R541	slr1226	6.3.2.6	ATP_[cyt] + 1-(5-Phospho-D-ribosyl)-5-amino-4-imidazolecarboxylate_[cyt] + L-Aspartate_[cyt] <=> ADP_[cyt] + Orthophosphate_[cyt] + 1-(5'-Phosphoribosyl)-5-amino-4-(N-succinocarboxamide)-imidazole_[cyt]	R04591	C00002_[cyt] + C04751_[cyt] + C00049_[cyt] <=> C00008_[cyt] + C00009_[cyt] + C04823_[cyt]	Purine	A
R542	sll0421	4.3.2.2	1-(5'-Phosphoribosyl)-5-amino-4-(N-succinocarboxamide)-imidazole_[cyt] <=> Fumarate_[cyt] + 1-(5'-Phosphoribosyl)-5-amino-4-imidazolecarboxamide_[cyt]	R04559	C04823_[cyt] <=> C00122_[cyt] + C04677_[cyt]	Purine	A
R543	slr0597	2.1.2.3	10-Formyltetrahydrofolate_[cyt] + 1-(5'-Phosphoribosyl)-5-amino-4-imidazolecarboxamide_[cyt] => Tetrahydrofolate_[cyt] + 1-(5'-Phosphoribosyl)-5-formamido-4-imidazolecarboxamide_[cyt]	R04560	C00234_[cyt] + C04677_[cyt] => C00101_[cyt] + C04734_[cyt]	Purine	A
R544	slr0597	2.1.2.3	IMP_[cyt] + H2O_[cyt] <=> 1-(5'-Phosphoribosyl)-5-formamido-4-imidazolecarboxamide_[cyt]	R01127	C00130_[cyt] + C00001_[cyt] <=> C04734_[cyt]	Purine	A
R545	sll1823	6.3.4.4	GTP_[cyt] + IMP_[cyt] + L-Aspartate_[cyt] => GDP_[cyt] + Orthophosphate_[cyt] + N6-(1,2-Dicarboxyethyl)-AMP_[cyt]	R01135	C00044_[cyt] + C00130_[cyt] + C00049_[cyt] => C00035_[cyt] + C00009_[cyt] + C03794_[cyt]	Purine	A
R546	sll0421	4.3.2.2	N6-(1,2-Dicarboxyethyl)-AMP_[cyt] => Fumarate_[cyt] + AMP_[cyt]	R01083	C03794_[cyt] => C00122_[cyt] + C00020_[cyt]	Purine	A
R547	slr0591, slr1164	1.17.4.1	dADP_[cyt] + Thioredoxin disulfide_[cyt] + H2O_[cyt] <= Thioredoxin_[cyt] + ADP_[cyt]	R02017	C00206_[cyt] + C00343_[cyt] + C00001_[cyt] <= C00342_[cyt] + C00008_[cyt]	Purine	A
R548	sll1108	3.1.3.5	dAMP_[cyt] + H2O_[cyt] <=> Deoxyadenosine_[cyt] + Orthophosphate_[cyt]	R02088	C00360_[cyt] + C00001_[cyt] <=> C00559_[cyt] + C00009_[cyt]	Purine	A
R549	sll1459	3.1.3.5	dAMP_[cyt] + H2O_[cyt] <=> Deoxyadenosine_[cyt] + Orthophosphate_[cyt]	R02088	C00360_[cyt] + C00001_[cyt] <=> C00559_[cyt] + C00009_[cyt]	Purine	A
R550	slr0591, slr1164	1.17.4.1	dGDP_[cyt] + Thioredoxin disulfide_[cyt] + H2O_[cyt] <= GDP_[cyt] + Thioredoxin_[cyt]	R02019	C00361_[cyt] + C00343_[cyt] + C00001_[cyt] <= C00035_[cyt] + C00342_[cyt]	Purine	A
R551	sll1430	2.4.2.7	AMP_[cyt] + Diphosphate_[cyt] <=> Adenine_[cyt] + 5-Phospho-alpha-D-ribose 1-diphosphate_[cyt]	R00190	C00020_[cyt] + C00013_[cyt] <=> C00147_[cyt] + C00119_[cyt]	Purine	A
R552	sll1005	3.6.1.19	GTP_[cyt] + H2O_[cyt] => GMP_[cyt] + Diphosphate_[cyt]	R00426	C00044_[cyt] + C00001_[cyt] => C00144_[cyt] + C00013_[cyt]	Purine	A
R553	sll1852	2.7.4.6	ATP_[cyt] + GDP_[cyt] <=> ADP_[cyt] + GTP_[cyt]	R00330	C00002_[cyt] + C00035_[cyt] <=> C00008_[cyt] + C00044_[cyt]	Purine	A
R554	sll1852	2.7.4.6	ATP_[cyt] + dADP_[cyt] <=> ADP_[cyt] + dATP_[cyt]	R01137	C00002_[cyt] + C00206_[cyt] <=> C00008_[cyt] + C00131_[cyt]	Purine	A
R555	sll1852	2.7.4.6	ATP_[cyt] + dGDP_[cyt] <=> ADP_[cyt] + dGTP_[cyt]	R01857	C00002_[cyt] + C00361_[cyt] <=> C00008_[cyt] + C00286_[cyt]	Purine	A
R556	-	-	5'-Deoxyadenosine_[cyt] + H2O_[cyt] => 5-Deoxy-D-ribose_[cyt] + Adenine_[cyt]	-	C05198_[cyt] + C00001_[cyt] => E19_[cyt] + C00147_[cyt]	Purine	E	unknown nucleosidase, needed for degradation/further consumption of 5'-Deoxyadenosine
R557	sll1108	3.1.3.5	AMP_[cyt] + H2O_[cyt] <=> Adenosine_[cyt] + Orthophosphate_[cyt]	R00183	C00020_[cyt] + C00001_[cyt] <=> C00212_[cyt] + C00009_[cyt]	Purine	A
R558	sll1459	3.1.3.5	AMP_[cyt] + H2O_[cyt] <=> Adenosine_[cyt] + Orthophosphate_[cyt]	R00183	C00020_[cyt] + C00001_[cyt] <=> C00212_[cyt] + C00009_[cyt]	Purine	A
R559	slr1722	1.1.1.205	IMP_[cyt] + NAD+_[cyt] + H2O_[cyt] => Xanthosine 5'-phosphate_[cyt] + NADH_[cyt] + H+_[cyt]	R01130	C00130_[cyt] + C00003_[cyt] + C00001_[cyt] => C00655_[cyt] + C00004_[cyt] + C00080_[cyt]	Purine	A
R560	slr0213	6.3.5.2	ATP_[cyt] + Xanthosine 5'-phosphate_[cyt] + L-Glutamine_[cyt] + H2O_[cyt] <=> AMP_[cyt] + Diphosphate_[cyt] + GMP_[cyt] + L-Glutamate_[cyt]	R01231	C00002_[cyt] + C00655_[cyt] + C00064_[cyt] + C00001_[cyt] <=> C00020_[cyt] + C00013_[cyt] + C00144_[cyt] + C00025_[cyt]	Purine	A
R561	slr1123	2.7.4.8	ATP_[cyt] + GMP_[cyt] <=> ADP_[cyt] + GDP_[cyt]	R00332	C00002_[cyt] + C00144_[cyt] <=> C00008_[cyt] + C00035_[cyt]	Purine	A
R562	slr0861	2.1.2.2	5'-Phosphoribosylglycinamide_[cyt] + Formate_[cyt] + ATP_[cyt] => 5'-Phosphoribosyl-N-formylglycinamide_[cyt] + ADP_[cyt] + Orthophsophate_[cyt]	-	C03838_[cyt] + C00058_[cyt] + C00002_[cyt] => C04376_[cyt] + C00009_[cyt] + C00008_[cyt]	Purine	B	PurT reaction of GAR transformylase; Marolewski et al. 1997
R563	sll1059	2.7.4.3	ATP_[cyt] + AMP_[cyt] <=> 2 ADP_[cyt]	R00127	C00002_[cyt] + C00020_[cyt] <=> 2 C00008_[cyt]	Purine	A
R564	sll1815	2.7.4.3	ATP_[cyt] + AMP_[cyt] <=> 2 ADP_[cyt]	R00127	C00002_[cyt] + C00020_[cyt] <=> 2 C00008_[cyt]	Purine	A
R565	sll1059	2.7.4.3	ATP_[cyt] + dAMP_[cyt] <=> ADP_[cyt] + dADP_[cyt]	R01547	C00002_[cyt] + C00360_[cyt] <=> C00008_[cyt] + C00206_[cyt]	Purine	A
R566	sll1815	2.7.4.3	ATP_[cyt] + dAMP_[cyt] <=> ADP_[cyt] + dADP_[cyt]	R01547	C00002_[cyt] + C00360_[cyt] <=> C00008_[cyt] + C00206_[cyt]	Purine	A
R567	sll1005	3.6.1.19	UTP_[cyt] + H2O_[cyt] => UMP_[cyt] + Diphosphate_[cyt]	R00662	C00075_[cyt] + C00001_[cyt] => C00105_[cyt] + C00013_[cyt]	Pyrimidine	A
R568	sll1852	2.7.4.6	ATP_[cyt] + dCDP_[cyt] <=> ADP_[cyt] + dCTP_[cyt]	R02326	C00002_[cyt] + C00705_[cyt] <=> C00008_[cyt] + C00458_[cyt]	Pyrimidine	A
R569	sll1852	2.7.4.6	ATP_[cyt] + dUDP_[cyt] <=> ADP_[cyt] + dUTP_[cyt]	R02331	C00002_[cyt] + C01346_[cyt] <=> C00008_[cyt] + C00460_[cyt]	Pyrimidine	A
R570	slr1476	2.1.3.2	Carbamoyl phosphate_[cyt] + L-Aspartate_[cyt] <=> Orthophosphate_[cyt] + N-Carbamoyl-L-aspartate_[cyt]	R01397	C00169_[cyt] + C00049_[cyt] <=> C00009_[cyt] + C00438_[cyt]	Pyrimidine	A
R571	sll1018	3.5.2.3	(S)-Dihydroorotate_[cyt] + H2O_[cyt] <=> N-Carbamoyl-L-aspartate_[cyt]	R01993	C00337_[cyt] + C00001_[cyt] <=> C00438_[cyt]	Pyrimidine	A
R572	slr0406	3.5.2.3	(S)-Dihydroorotate_[cyt] + H2O_[cyt] <=> N-Carbamoyl-L-aspartate_[cyt]	R01993	C00337_[cyt] + C00001_[cyt] <=> C00438_[cyt]	Pyrimidine	A
R573	sll0744	1.3.98.1	(S)-Dihydroorotate_[cyt] + Fumarate_[cyt] => Orotate_[cyt] + Succinate_[cyt]	R01867	C00337_[cyt] + C00122_[cyt] => C00295_[cyt] + C00042_[cyt]	Pyrimidine	A
R574	slr1418	1.3.98.1	(S)-Dihydroorotate_[cyt] + Fumarate_[cyt] => Orotate_[cyt] + Succinate_[cyt]	R01867	C00337_[cyt] + C00122_[cyt] => C00295_[cyt] + C00042_[cyt]	Pyrimidine	A
R575	slr0185	2.4.2.10	Orotidine 5'-phosphate_[cyt] + Diphosphate_[cyt] <=> Orotate_[cyt] + 5-Phospho-alpha-D-ribose 1-diphosphate_[cyt]	R01870	C01103_[cyt] + C00013_[cyt] <=> C00295_[cyt] + C00119_[cyt]	Pyrimidine	A
R576	sll0838	4.1.1.23	Orotidine 5'-phosphate_[cyt] => UMP_[cyt] + CO2_[cyt]	R00965	C01103_[cyt] => C00105_[cyt] + C00011_[cyt]	Pyrimidine	A
R577	sll1249	2.7.4.14	ATP_[cyt] + CMP_[cyt] <=> ADP_[cyt] + CDP_[cyt]	R00512	C00002_[cyt] + C00055_[cyt] <=> C00008_[cyt] + C00112_[cyt]	Pyrimidine	A
R578	sll0144	2.7.4.22	ATP_[cyt] + UMP_[cyt] <=> ADP_[cyt] + UDP_[cyt]	R00158	C00002_[cyt] + C00105_[cyt] <=> C00008_[cyt] + C00015_[cyt]	Pyrimidine	A
R579	sll1249	2.7.4.14	ATP_[cyt] + UMP_[cyt] <=> ADP_[cyt] + UDP_[cyt]	R00158	C00002_[cyt] + C00105_[cyt] <=> C00008_[cyt] + C00015_[cyt]	Pyrimidine	A
R580	sll1852	2.7.4.6	ATP_[cyt] + UDP_[cyt] <=> ADP_[cyt] + UTP_[cyt]	R00156	C00002_[cyt] + C00015_[cyt] <=> C00008_[cyt] + C00075_[cyt]	Pyrimidine	A
R581	sll1852	2.7.4.6	ATP_[cyt] + CDP_[cyt] <=> ADP_[cyt] + CTP_[cyt]	R00570	C00002_[cyt] + C00112_[cyt] <=> C00008_[cyt] + C00063_[cyt]	Pyrimidine	A
R582	sll1443	6.3.4.2	ATP_[cyt] + UTP_[cyt] + NH3_[cyt] => ADP_[cyt] + Orthophosphate_[cyt] + CTP_[cyt]	R00571	C00002_[cyt] + C00075_[cyt] + C00014_[cyt] => C00008_[cyt] + C00009_[cyt] + C00063_[cyt]	Pyrimidine	A
R583	sll1443	6.3.4.2	ATP_[cyt] + UTP_[cyt] + L-Glutamine_[cyt] + H2O_[cyt] => ADP_[cyt] + Orthophosphate_[cyt] + CTP_[cyt] + L-Glutamate_[cyt]	R00573	C00002_[cyt] + C00075_[cyt] + C00064_[cyt] + C00001_[cyt] => C00008_[cyt] + C00009_[cyt] + C00063_[cyt] + C00025_[cyt]	Pyrimidine	A
R584	sll1258	3.5.4.13	dCTP_[cyt] + H2O_[cyt] => dUTP_[cyt] + NH3_[cyt]	R02325	C00458_[cyt] + C00001_[cyt] => C00460_[cyt] + C00014_[cyt]	Pyrimidine	A
R585	sll1258	3.5.4.13	CTP_[cyt] + H2O_[cyt] => UTP_[cyt] + NH3_[cyt]	R00568	C00063_[cyt] + C00001_[cyt] => C00075_[cyt] + C00014_[cyt]	Pyrimidine	A
R586	slr0379	2.7.4.9	ATP_[cyt] + dTMP_[cyt] <=> ADP_[cyt] + dTDP_[cyt]	R02094	C00002_[cyt] + C00364_[cyt] <=> C00008_[cyt] + C00363_[cyt]	Pyrimidine	A
R587	slr0379	2.7.4.9	ATP_[cyt] + dUMP_[cyt] <=> ADP_[cyt] + dUDP_[cyt]	R02098	C00002_[cyt] + C00365_[cyt] <=> C00008_[cyt] + C01346_[cyt]	Pyrimidine	A
R588	sll1635	2.1.1.148	5,10-Methylenetetrahydrofolate_[cyt] + dUMP_[cyt] + NADPH_[cyt] + H+_[cyt] => Tetrahydrofolate_[cyt] + dTMP_[cyt] + NADP+_[cyt]	-	C00143_[cyt] + C00365_[cyt] + C00080_[cyt] + C00005_[cyt] => C00101_[cyt] + C00364_[cyt] + C00006_[cyt]	Pyrimidine	A	NADPH serves as final electron acceptor; Graziani et al. 2004
R589	sll1005	3.6.1.19	dUTP_[cyt] + H2O_[cyt] => dUMP_[cyt] + Diphosphate_[cyt]	R02100	C00044_[cyt] + C00001_[cyt] => C00144_[cyt] + C00013_[cyt]	Pyrimidine	A
R590	slr0591, slr1164	1.17.4.1	dCDP_[cyt] + Thioredoxin disulfide_[cyt] + H2O_[cyt] <= Thioredoxin_[cyt] + CDP_[cyt]	R02024	C00705_[cyt] + C00343_[cyt] + C00001_[cyt] <= C00342_[cyt] + C00112_[cyt]	Pyrimidine	A
R591	slr0591, slr1164	1.17.4.1	dUDP_[cyt] + Thioredoxin disulfide_[cyt] + H2O_[cyt] <= Thioredoxin_[cyt] + UDP_[cyt]	R02018	C01346_[cyt] + C00343_[cyt] + C00001_[cyt] <= C00342_[cyt] + C00015_[cyt]	Pyrimidine	A
R592	sll1852	2.7.4.6	ATP_[cyt] + dTDP_[cyt] <=> ADP_[cyt] + dTTP_[cyt]	R02093	C00002_[cyt] + C00363_[cyt] <=> C00008_[cyt] + C00459_[cyt]	Pyrimidine	A
R593	slr1736	2.5.1.-	Phytyl diphosphate_[cyt] + Homogentisate_[cyt] => 2-Methyl-6-phytylquinol_[cyt] + Diphosphate_[cyt] + CO2_[cyt]	R07500	C05427_[cyt] + C00544_[cyt] => C15882_[cyt] + C00013_[cyt] + C00011_[cyt]	Quinone and Tocopherol	A	Schledz et al. 2001
R594	slr1737	-	2-Methyl-6-phytylquinol_[cyt] <=> delta-Tocopherol_[cyt]	R07503	C15882_[cyt] <=> C14151_[cyt]	Quinone and Tocopherol	A
R595	slr1737	-	2,3-Dimethyl-5-phytylquinol_[cyt] <=> gamma-Tocopherol_[cyt]	R07502	C15883_[cyt] <=> C02483_[cyt]	Quinone and Tocopherol	A
R596	slr0089	2.1.1.95	S-Adenosyl-L-methionine_[cyt] + gamma-Tocopherol_[cyt] => S-Adenosyl-L-homocysteine_[cyt] + alpha-Tocopherol_[cyt]	R07236	C00019_[cyt] + C02483_[cyt] => C00021_[cyt] + C02477_[cyt]	Quinone and Tocopherol	A
R597	slr0089	2.1.1.95	delta-Tocopherol_[cyt] + S-Adenosyl-L-methionine_[cyt] => beta-Tocopherol_[cyt] + S-Adenosyl-L-homocysteine_[cyt]	R07504	C14151_[cyt] + C00019_[cyt] => C14152_[cyt] + C00021_[cyt]	Quinone and Tocopherol	A
R598	sll1797	4.1.3.40	4-Hydroxybenzoate_[cyt] + Pyruvate_[cyt] <= Chorismate_[cyt]	R01302	C00156_[cyt] + C00022_[cyt] <= C00251_[cyt]	Quinone and Tocopherol	B	BLAST search: identity 46 %, score 162, E-value 6e-42 to 4-hydroxybenzoate synthetase from Prochlorococcus marinus str. MIT 9303, need for plastoquinone-9 biosynthesis; Sadre et al. 2011
R599	slr0926	2.5.1.39	all-trans-Nonaprenyl diphosphate_[cyt] + 4-Hydroxybenzoate_[cyt] => Diphosphate_[cyt] + 3-Nonaprenyl-4-hydroxybenzoate_[cyt]	R07273	C04145_[cyt] + C00156_[cyt] => C00013_[cyt] + C03885_[cyt]	Quinone and Tocopherol	B	PlqA; Sadre et al. 2011
R600	sll0936 or slr1099 or slr1300	-	3-Nonaprenyl-4-hydroxybenzoate_[cyt] + 4 H+_[cyt] => 2-Methyl-6-solanyl-1,4-benzoquinol_[cyt] + H2O_[cyt]	-	C03885_[cyt] + 4 C00080_[cyt] => C17570_[cyt] + C00001_[cyt]	Quinone and Tocopherol	D	Unknown reaction; combined steps of the plastoquinone biosynthesis (Sadre et al. 2011)
R601	sll0418	-	2-Methyl-6-solanyl-1,4-benzoquinol_[cyt] + S-Adenosyl-L-methionine_[cyt] => Plastoquinone-9_[cyt] + S-Adenosyl-L-homocysteine_[cyt] + 2 H+_[cyt]	R08783	C17570_[cyt] + C00019_[cyt] => C10385_[cyt] + C00021_[cyt] + 2 C00080_[cyt]	Quinone and Tocopherol	A	Cheng et al. 2003; Hohmann-Mariott and Blankenship 2010
R602	sll0418	-	2-Methyl-6-phytylquinol_[cyt] + S-Adenosyl-L-methionine_[cyt] => 2,3-Dimethyl-5-phytylquinol_[cyt] + S-Adenosyl-L-homocysteine_[cyt]	R07501	C15882_[cyt] + C00019_[cyt] => C15883_[cyt] + C00021_[cyt]	Quinone and Tocopherol	A	Cheng et al. 2003; Hohmann-Mariott and Blankenship 2010
R603	sll0603	5.4.4.2	Chorismate_[cyt] <=> Isochorismate_[cyt]	R01717	C00251_[cyt] <=> C00885_[cyt]	Quinone and Tocopherol	A
R604	slr0817	5.4.4.2	Chorismate_[cyt] <=> Isochorismate_[cyt]	R01717	C00251_[cyt] <=> C00885_[cyt]	Quinone and Tocopherol	A
R605	sll0603	2.2.1.9	Isochorismate_[cyt] + 2-Oxoglutarate_[cyt] => 2-Succinyl-5-enolpyruvyl-6-hydroxy-3-cyclohexene-1-carboxylate_[cyt] + CO2_[cyt]	R08165	C00885_[cyt] + C00026_[cyt] => C16519_[cyt] + C00011_[cyt]	Quinone and Tocopherol	A	Wade Johnson et al. 2003
R606	slr1916	4.2.99.20	2-Succinyl-5-enolpyruvyl-6-hydroxy-3-cyclohexene-1-carboxylate_[cyt] => (1R,6R)-6-Hydroxy-2-succinylcyclohexa-2,4-diene-1-carboxylate_[cyt] + Pyruvate_[cyt]	R08166	C16519_[cyt] => C05817_[cyt] + C00022_[cyt]	Quinone and Tocopherol	A
R607	sll0409	4.2.1.113	(1R,6R)-6-Hydroxy-2-succinylcyclohexa-2,4-diene-1-carboxylate_[cyt] => 2-Succinylbenzoate_[cyt] + H2O_[cyt]	R04031	C05817_[cyt] => C02730_[cyt] + C00001_[cyt]	Quinone and Tocopherol	A
R608	slr0492	6.2.1.26	ATP_[cyt] + 2-Succinylbenzoate_[cyt] + CoA_[cyt] => AMP_[cyt] + Diphosphate_[cyt] + 2-Succinylbenzoyl-CoA_[cyt]	R04030	C00002_[cyt] + C02730_[cyt] + C00010_[cyt] => C00020_[cyt] + C00013_[cyt] + C03160_[cyt]	Quinone and Tocopherol	A	Wade Johnson et al. 2003
R609	sll1127	4.1.3.36	2-Succinylbenzoyl-CoA_[cyt] => 1,4-Dihydroxy-2-naphthoyl-CoA_[cyt] + H2O_[cyt]	R07263	C03160_[cyt] => C15547_[cyt] + C00001_[cyt]	Quinone and Tocopherol	A
R610	slr0204	3.1.2.28	1,4-Dihydroxy-2-naphthoyl-CoA_[cyt] + H2O_[cyt] => 1,4-Dihydroxy-2-naphthoate_[cyt] + CoA_[cyt]	R07262	C15547_[cyt] + C00001_[cyt] => C03657_[cyt] + C00010_[cyt]	Quinone and Tocopherol	A
R611	slr1518	2.5.1.-	1,4-Dihydroxy-2-naphthoate_[cyt] + Phytyl diphosphate_[cyt] => 2-Phytyl-1,4-naphthoquinone_[cyt] + CO2_[cyt] + Diphosphate_[cyt] + 2 H+_[cyt]	R06858	C03657_[cyt] + C05427_[cyt] => C13309_[cyt] + C00011_[cyt] + C00013_[cyt] + 2 C00080_[cyt]	Quinone and Tocopherol	A
R612	sll1653	2.1.1.-	2-Phytyl-1,4-naphthoquinone_[cyt] + S-Adenosyl-L-methionine_[cyt] => Phylloquinone_[cyt] + S-Adenosyl-L-homocysteine_[cyt]	R06859	C13309_[cyt] + C00019_[cyt] => C02059_[cyt] + C00021_[cyt]	Quinone and Tocopherol	A	Johnson et al. 2000
R613	slr0090	1.13.11.27	3-(4-Hydroxyphenyl)pyruvate_[cyt] + Oxygen_[cyt] => Homogentisate_[cyt] + CO2_[cyt]	R02521	C01179_[cyt] + C00007_[cyt] => C00544_[cyt] + C00011_[cyt]	Quinone andTocopherol	A	Essential for tocopherol synthesis; Daehnhardt et al. 2002
R614	sll1894	3.5.4.25	GTP_[cyt] + 3 H2O_[cyt] => Formate_[cyt] + 2,5-Diamino-6-(5'-phosphoribosylamino)-4-pyrimidineone_[cyt] + Diphosphate_[cyt]	R00425	C00044_[cyt] + 3 C00001_[cyt] => C00058_[cyt] + C01304_[cyt] + C00013_[cyt]	Riboflavin	A
R615	slr0066	3.5.4.26	2,5-Diamino-6-(5'-phosphoribosylamino)-4-pyrimidineone_[cyt] + H2O_[cyt] => 5-Amino-6-(5'-phosphoribosylamino)uracil_[cyt] + NH3_[cyt]	R03459	C01304_[cyt] + C00001_[cyt] => C01268_[cyt] + C00014_[cyt]	Riboflavin	A
R616	sll0400	3.1.3.-	5-Amino-6-(5'-phosphoribitylamino)uracil_[cyt] + H2O_[cyt] <=> 5-Amino-6-(1-D-ribitylamino)uracil_[cyt] + Orthophosphate_[cyt]	R07280	C04454_[cyt] + C00001_[cyt] <=> C04732_[cyt] + C00009_[cyt]	Riboflavin	D	Needed for FAD synthesis, sll0400 can be a candidate gene for the reaction
R617	slr0066	1.1.1.193	5-Amino-6-(5'-phosphoribitylamino)uracil_[cyt] + NADP+_[cyt] <= 5-Amino-6-(5'-phosphoribosylamino)uracil_[cyt] + NADPH_[cyt] + H+_[cyt]	R03458	C04454_[cyt] + C00006_[cyt] <= C01268_[cyt] + C00005_[cyt] + C00080_[cyt]	Riboflavin	A
R618	sll1894	4.1.99.12	D-Ribulose 5-phosphate_[cyt] => 3,4-Dihydroxy-2-butanone 4-phosphate_[cyt] + Formate_[cyt]	R07281	C00199_[cyt] => C15556_[cyt] + C00058_[cyt]	Riboflavin	A
R619	sll1282	2.5.1.78	5-Amino-6-(1-D-ribitylamino)uracil_[cyt] + 3,4-Dihydroxy-2-butanone 4-phosphate_[cyt] => 6,7-Dimethyl-8-(1-D-ribityl)lumazine_[cyt] + 2 H2O_[cyt] + Orthophosphate_[cyt]	R04457	C04732_[cyt] + C15556_[cyt] => C04332_[cyt] + 2 C00001_[cyt] + C00009_[cyt]	Riboflavin	A	RibH (riboflavin synthase)
R620	sll0300	2.5.1.9	2 6,7-Dimethyl-8-(1-D-ribityl)lumazine_[cyt] => Riboflavin_[cyt] + 5-Amino-6-(1-D-ribitylamino)uracil_[cyt]	R00066	2 C04332_[cyt] => C00255_[cyt] + C04732_[cyt]	Riboflavin	A
R621	slr1882	2.7.1.26	ATP_[cyt] + Riboflavin_[cyt] => ADP_[cyt] + FMN_[cyt]	R00549	C00002_[cyt] + C00255_[cyt] => C00008_[cyt] + C00061_[cyt]	Riboflavin	A
R622	slr1882	2.7.7.2	ATP_[cyt] + FMN_[cyt] => Diphosphate_[cyt] + FAD_[cyt]	R00161	C00002_[cyt] + C00061_[cyt] => C00013_[cyt] + C00016_[cyt]	Riboflavin	A
R623	slr0945	1.5.1.38	Reduced FMN_[cyt] + NADP+_[cyt] <=> FMN_[cyt] + NADPH_[cyt] + H+_[cyt]	R05706	C01847_[cyt] + C00006_[cyt] <=> C00061_[cyt] + C00005_[cyt] + C00080_[cyt]	Riboflavin	C	BLAST search: identity 87.6 %, score 363, E-value e-102 to NADPH-dependent FMN reductase from Cyanothece sp. ATCC 51142
R624	slr1719 or slr0001	1.14.99.40	Reduced FMN_[cyt] + Oxygen_[cyt] + NADH_[cyt] + H+_[cyt] => Dimethylbenzimidazole_[cyt] + D-Erythrose 4-phosphate_[cyt] + H2O_[cyt] + NAD+_[cyt]	-	C01847_[cyt] + C00007_[cyt] + C00004_[cyt] + C00080_[cyt] => C03114_[cyt] + C00279_[cyt] + C00001_[cyt] + C00003_[cyt]	Riboflavin	D	BLAST search: slr1719 identity 67 %, score 278, E-value 3e-76 to nitroreductase from Trichodesmium erythraeum IMS101; also 1.16.8.1 is capable to catalyze this reaction; reaction stoichiometry unclear up to now, unknown metabolite is produced
R625	sll1566	2.4.1.213	ADP-glucose_[cyt] + sn-Glycerol 3-phosphate_[cyt] => 2-(beta-D-Glucosyl)-sn-glycerol 3-phosphate_[cyt] + ADP_[cyt]	R05328	C00498_[cyt] + C00093_[cyt] => C10517_[cyt] + C00008_[cyt]	Stress	A
R626	slr0746	3.1.3.69	2-(beta-D-Glucosyl)-sn-glycerol 3-phosphate_[cyt] + H2O_[cyt] => 2-(beta-D-Glucosyl)-sn-glycerol_[cyt] + Orthophosphate_[cyt]	R05791	C10517_[cyt] + C00001_[cyt] => C11546_[cyt] + C00009_[cyt]	Stress	A
R627	sll1683	4.1.1.18	L-Lysine_[cyt] => Cadaverine_[cyt] + CO2_[cyt]	R00462	C00047_[cyt] => C01672_[cyt] + C00011_[cyt]	Stress	A	Incharoensakdi et al. 2010
R628	sll0228	3.5.3.11	Agmatine_[cyt] + H2O_[cyt] => Putrescine_[cyt] + Urea_[cyt]	R01157	C00179_[cyt] + C00001_[cyt] => C00134_[cyt] + C00086_[cyt]	Stress	A	Schriekt et al. 2007
R629	-	2.5.1.16	S-Adenosylmethioninamine_[cyt] + Putrescine_[cyt] => 5'-Methylthioadenosine_[cyt] + Spermidine_[cyt] + H+_[cyt]	R01920	C01137_[cyt] + C00134_[cyt] => C00170_[cyt] + C00315_[cyt] + C00080_[cyt]	Stress	E	No genes could be identified; Jantaro et al. 2003
R630	-	2.5.1.16	S-Adenosylmethioninamine_[cyt] + Spermidine_[cyt] => 5'-Methylthioadenosine_[cyt] + Spermine_[cyt] + H+_[cyt]	R02869	C01137_[cyt] + C00315_[cyt] => C00170_[cyt] + C00750_[cyt] + C00080_[cyt]	Stress	E	No genes could be identified; Jantaro et al. 2003
R631	sll0135	2.4.2.28	5'-Methylthioadenosine_[cyt] + Orthophosphate_[cyt] => Adenine_[cyt] + S-Methyl-5-thio-D-ribose 1-phosphate_[cyt]	R01402	C00170_[cyt] + C00009_[cyt] => C00147_[cyt] + C04188_[cyt]	Stress	A
R632	slr1938	5.3.1.23	S-Methyl-5-thio-D-ribose 1-phosphate_[cyt] <=> S-Methyl-5-thio-D-ribulose 1-phosphate_[cyt]	R04420	C04188_[cyt] <=> C04582_[cyt]	Stress	A
R633	slr1176	2.7.7.27	ATP_[cyt] + D-Glucose 1-phosphate_[cyt] => Diphosphate_[cyt] + ADP-Glucose_[cyt]	R00948	C00002_[cyt] + C00103_[cyt] => C00013_[cyt] + C00498_[cyt]	Glycolysis and Sugar	A
R634	sll0945	2.4.1.21	ADP-Glucose_[cyt] => ADP_[cyt] + Amylose_[cyt]	R02421	C00498_[cyt] => C00008_[cyt] + C00718_[cyt]	Glycolysis and Sugar	A
R635	sll1393	2.4.1.21	ADP-Glucose_[cyt] => ADP_[cyt] + Amylose_[cyt]	R02421	C00498_[cyt] => C00008_[cyt] + C00718_[cyt]	Glycolysis and Sugar	A
R636	sll0158	2.4.1.18	Amylose_[cyt] + Glycogen granule_[ext] => Glycogen_[cyt]	R02110	C00718_[cyt] + C00182N_[cyt] => C00182_[cyt]	Glycolysis and Sugar	A
R637	sll1356	2.4.1.1	Amylose_[cyt] + Orthophosphate_[cyt] => D-Glucose 1-phosphate_[cyt]	R01821	C00718_[cyt] + C00009_[cyt] => C00103_[cyt]	Glycolysis and Sugar	A
R638	slr1367	2.4.1.1	Amylose_[cyt] + Orthophosphate_[cyt] => D-Glucose 1-phosphate_[cyt]	R01821	C00718_[cyt] + C00009_[cyt] => C00103_[cyt]	Glycolysis and Sugar	A
R639	slr1367	2.4.1.1	Glycogen_[cyt] + Orthophosphate_[cyt] => D-Glucose 1-phosphate_[cyt] + Glycogen granule_[cyt]	R02111	C00182_[cyt] + C00009_[cyt] => C00103_[cyt] + C00182N_[cyt]	Glycolysis and Sugar	A
R640	sll1356	2.4.1.1	Glycogen_[cyt] + Orthophosphate_[cyt] => D-Glucose 1-phosphate_[cyt] + Glycogen granule_[ext]	R02111	C00182_[cyt] + C00009_[cyt] => C00103_[cyt] + C00182N_[cyt]	Glycolysis and Sugar	A
R641	slr0237	3.2.1.-	Glycogen_[cyt] + H2O_[cyt] => D-Glucose_[cyt] + Glycogen granule_[cyt]	-	C00182_[cyt] + C00001_[cyt] => C00031_[cyt] + C00182N_[cyt]	Glycolysis and Sugar	A
R642	slr1857	3.2.1.-	Glycogen_[cyt] + H2O_[cyt] => D-Glucose_[cyt] + Glycogen granule_[cyt]	-	C00182_[cyt] + C00001_[cyt] => C00031_[cyt] + C00182N_[cyt]	Glycolysis and Sugar	A
R643	slr1993	2.3.1.9	2 Acetyl-CoA_[cyt] <=> CoA_[cyt] + Acetoacetyl-Co_[cyt]	R00238	2 C00024_[cyt] <=> C00010_[cyt] + C00332_[cyt]	PHB	A
R644	slr1994	1.1.1.36	(R)-3-Hydroxybutanoyl-CoA_[cyt] + NADP+_[cyt] <=> Acetoacetyl-CoA_[cyt] + NADPH_[cyt] + H+_[cyt]	R01977	C03561_[cyt] + C00006_[cyt] <=> C00332_[cyt] + C00005_[cyt] + C00080_[cyt]	PHB	A	Taroncher-Oldenburg et al. 2000
R645	slr1829, slr1830	2.3.1.-	(R)-3-Hydroxybutanoyl-CoA_[cyt] <=> Poly-beta-hydroxybutyrate_[cyt] + CoA_[cyt]	R04254	C03561_[cyt] <=> C06143_[cyt] + C00010_[cyt]	PHB	A	Taroncher-Oldenburg et al. 2000
R646	slr2002	6.3.2.29	1 L-Aspartate_[cyt] + 1 L-Arginine_[cyt] + 2 ATP_[cyt] + Cyanophycin polymer_[cyt] => Cyanophycin_[cyt] + 2 Orthophosphate_[cyt] + 2 ADP_[cyt]	-	1 C00049_[cyt] + 1 C00062_[cyt] + 2 C00002_[cyt] + E10N_[cyt] => E10_[cyt] + 2 C00009_[cyt] + 2 C00008_[cyt]	Cyanophycin	A
R647	slr2001	3.4.15.6	Cyanophycine_[cyt] + 2 H2O_[cyt] => 1 L-Aspartate_[cyt] + 1 L-Arginine_[cyt] + Cyanophycin polymer_[cyt]	-	E10_[cyt] + 2 C00001_[cyt] => 1 C00049_[cyt] + 1 C00062_[cyt] + E10N_[cyt]	Cyanophycin	A
R648	sll1945	2.2.1.7	Pyruvate_[cyt] + D-Glyceraldehyde 3-phosphate_[cyt] => 1-Deoxy-D-xylulose 5-phosphate_[cyt] + CO2_[cyt]	R05636	C00022_[cyt] + C00118_[cyt] => C11437_[cyt] + C00011_[cyt]	Terpenoids	A
R649	sll0019	1.1.1.267	2-C-Methyl-D-erythritol 4-phosphate_[cyt] + NADP+_[cyt] <= 1-Deoxy-D-xylulose 5-phosphate_[cyt] + NADPH_[cyt] + H+_[cyt]	R05688	C11434_[cyt] + C00006_[cyt] <= C11437_[cyt] + C00005_[cyt] + C00080_[cyt]	Terpenoids	A
R650	slr0951	2.7.7.60	2-C-Methyl-D-erythritol 4-phosphate_[cyt] + CTP_[cyt] => 4-(Cytidine 5'-diphospho)-2-C-methyl-D-erythritol_[cyt] + Diphosphate_[cyt]	R05633	C11434_[cyt] + C00063_[cyt] => C11435_[cyt] + C00013_[cyt]	Terpenoids	A
R651	sll0711	2.7.1.148	4-(Cytidine 5'-diphospho)-2-C-methyl-D-erythritol_[cyt] + ATP_[cyt] <=> 2-Phospho-4-(cytidine 5'-diphospho)-2-C-methyl-D-erythritol_[cyt] + ADP_[cyt]	R05634	C11435_[cyt] + C00002_[cyt] => C11436_[cyt] + C00008_[cyt]	Terpenoids	A
R652	slr1542	4.6.1.12	2-Phospho-4-(cytidine 5'-diphospho)-2-C-methyl-D-erythritol_[cyt] => 2-C-Methyl-D-erythritol 2,4-cyclodiphosphate_[cyt] + CMP_[cyt]	R05637	C11436_[cyt] => C11453_[cyt] + C00055_[cyt]	Terpenoids	A
R653	slr2136	1.17.7.1	2-C-Methyl-D-erythritol 2,4-cyclodiphosphate_[cyt] + 2 Reduced ferredoxin_[cyt] + 2 H+_[cyt] => 1-Hydroxy-2-methyl-2-butenyl 4-diphosphate_[cyt] + H2O_[cyt] + 2 Oxidized ferredoxin_[cyt]	R08689	C11453_[cyt] + 2 C00138_[cyt] + 2 C00080_[cyt] => C11811_[cyt] + C00001_[cyt] + 2 C00139_[cyt]	Terpenoids	A
R654	slr0348	1.17.1.2	1-Hydroxy-2-methyl-2-butenyl 4-diphosphate_[cyt] + NADPH_[cyt] + H+_[cyt] => Isopentenyl diphosphate_[cyt] + NADP+_[cyt] + H2O_[cyt]	R05884	C11811_[cyt] + C00005_[cyt] + C00080_[cyt] => C00129_[cyt] + C00006_[cyt] + C00001_[cyt]	Terpenoids	A
R655	slr0348	1.17.1.2	Dimethylallyl diphosphate_[cyt] + NADP+_[cyt] + H2O_[cyt] <= 1-Hydroxy-2-methyl-2-butenyl 4-diphosphate_[cyt] + NADPH_[cyt] + H+_[cyt]	R07219	C00235_[cyt] + C00006_[cyt] + C00001_[cyt] <= C11811_[cyt] + C00005_[cyt] + C00080_[cyt]	Terpenoids	A
R656	sll1556	5.3.3.2	Isopentenyl diphosphate_[cyt] <=> Dimethylallyl diphosphate_[cyt]	R01123	C00129_[cyt] <=> C00235_[cyt]	Terpenoids	A
R657	slr0739	2.5.1.1	Dimethylallyl diphosphate_[cyt] + Isopentenyl diphosphate_[cyt] => Diphosphate_[cyt] + Geranyl diphosphate_[cyt]	R01658	C00235_[cyt] + C00129_[cyt] => C00013_[cyt] + C00341_[cyt]	Terpenoids	A
R658	slr0739	2.5.1.10	Geranyl diphosphate_[cyt] + Isopentenyl diphosphate_[cyt] => Diphosphate_[cyt] + trans,trans-Farnesyl diphosphate_[cyt]	R02003	C00341_[cyt] + C00129_[cyt] => C00013_[cyt] + C00448_[cyt]	Terpenoids	A
R659	slr0739	2.5.1.29	trans,trans-Farnesyl diphosphate_[cyt] + Isopentenyl diphosphate_[cyt] => Diphosphate_[cyt] + Geranylgeranyl diphosphate_[cyt]	R02061	C00448_[cyt] + C00129_[cyt] => C00013_[cyt] + C00353_[cyt]	Terpenoids	A
R660	sll0506	2.5.1.31	trans,trans-Farnesyl diphosphate_[cyt] + 8 Isopentenyl diphosphate_[cyt] => di-trans,poly-cis-Undecaprenyl diphosphate_[cyt] + 8 Diphosphate_[cyt]	R06447	C00448_[cyt] + 8 C00129_[cyt] => C04574_[cyt] + 8 C00013_[cyt]	Terpenoids	A
R661	sll1091	1.3.1.83	Geranylgeranyl diphosphate_[cyt] + 3 H+_[cyt] + 3 NADPH_[cyt] => Phytyl diphosphate_[cyt] + 3 NADP+_[cyt]	R02063	C00353_[cyt] + 3 C00080_[cyt] + 3 C00005_[cyt] => C05427_[cyt] + 3 C00006_[cyt]	Terpenoids	A
R662	slr0611	2.5.1.84	Geranyl diphosphate_[cyt] + 7 Isopentenyl diphosphate_[cyt] => all-trans-Nonaprenyl diphosphate_[cyt] + 7 Diphosphate_[cyt]	R09250	C00341_[cyt] + 7 C00129_[cyt] => C04145_[cyt] + 7 C00013_[cyt]	Terpenoids	A
R663	slr0611	2.5.1.85	Geranylgeranyl diphosphate_[cyt] + 5 Isopentenyl diphosphate_[cyt] => all-trans-Nonaprenyl diphosphate_[cyt] + 5 Diphosphate_[cyt]	R09251	C00353_[cyt] + 5 C00129_[cyt] => C04145_[cyt] + 5 C00013_[cyt]	Terpenoids	A
R664	slr0118	-	Aminoimidazole ribotide_[cyt] + S-Adenosyl-L-methionine_[cyt] <=> 4-Amino-2-methyl-5-phosphomethylpyrimidine_[cyt] + L-Methionine_[cyt] + 5'-Deoxyadenosine_[cyt] + Formate_[cyt] + Carbon monoxide_[cyt]	-	C03373_[cyt] + C00019_[cyt] <=> C04556_[cyt] + C00073_[cyt] + C05198_[cyt] + C00058_[cyt] + C00237_[cyt]	Thiamine pyrophosphate	D	ThiC, ThiD not annotated, combined reaction
R665	-	-	ATP_[cyt] + 4-Amino-2-methyl-5-phosphomethylpyrimidine_[cyt] => ADP_[cyt] + 2-Methyl-4-amino-5-hydroxymethylpyrimidine diphosphate_[cyt]	-	C00002_[cyt] + C04556_[cyt] => C00008_[cyt] + C04752_[cyt]	Thiamine pyrophosphate	E	No genes could be identified
R666	ssr0102, slr0633	-	L-Cysteine_[cyt] + ATP_[cyt] + 1-Deoxy-D-xylulose 5-phosphate_[cyt] + L-Tyrosine_[cyt] + S-Adenosyl-L-methionine_[cyt] + NADPH_[cyt] + 3 H+_[cyt] => 4-Methyl-5-(2-phosphoethyl)-thiazole_[cyt] + Diphosphate_[cyt] + L-Methionine_[cyt] + L-Alanine_[cyt] + 4-	R07464	C00097_[cyt] + C00002_[cyt] + C11437_[cyt] + C00082_[cyt] + C00019_[cyt] + C00005_[cyt] + 3 C00080_[cyt] => C04327_[cyt] + C00013_[cyt] + C00073_[cyt] + C00041_[cyt] + C01468_[cyt] + C05198_[cyt] + C00011_[cyt] + 2 C00001_[cyt] + C00020_[cyt] + C00006_[cy	Thiamine pyrophosphate	D	BLAST search: ssr0102 identity 68 %, score 98, E-value 2e-22 to ThiS from Nostoc punctiforme ATCC 29133, combined reaction with ThiG, single steps are unknow or poorly analyzed
R667	sll0635	2.5.1.3	2-Methyl-4-amino-5-hydroxymethylpyrimidine diphosphate_[cyt] + 4-Methyl-5-(2-phosphoethyl)-thiazole_[cyt] + H+_[cyt] => Diphosphate_[cyt] + Thiamin monophosphate_[cyt]	R03223	C04752_[cyt] + C04327_[cyt] + C00080_[cyt] => C00013_[cyt] + C01081_[cyt]	Thiamine pyrophosphate	A
R668	slr1787	2.7.4.16	ATP_[cyt] + Thiamin monophosphate_[cyt] => ADP_[cyt] + Thiamin diphosphate_[cyt]	R00617	C00002_[cyt] + C01081_[cyt] => C00008_[cyt] + C00068_[cyt]	Thiamine pyrophosphate	A
R669	-	-	1 H+_[ext] <=> 1 H+_[cyt]	-	C00080_[ext] <=> C00080_[cyt]	Transport	-	Protoninterexchange
R670	-	-	1 Oxygen_[ext] <=> 1 Oxygen_[cyt]	-	C00007_[ext] <=> C00007_[cyt]	Transport	-	Oxygeninterexchange
R671	-	-	1 CO2_[cyt] => 1 CO2_[ext]	-	C00011_[cyt] => C00011_[ext]	Transport	-	CO2Release
R672	slr2057	-	1 H2O_[ext] <=> 1 H2O_[cyt]	-	C00001_[ext] <=> C00001_[cyt]	Transport	A
R673	slr0040, slr0041, slr0043, slr0044	-	1 HCO3-_[ext] + 1 ATP_[cyt] + H2O_[cyt] => 1 HCO3-_[cyt] + 1 ADP_[cyt] + Orthophosphate_[cyt]	-	C00288_[ext] + C00002_[cyt] + C00001_[cyt] => C00288_[cyt] + C00008_[cyt] + C00009_[cyt]	Transport	A
R674	slr1512	-	Na+_[ext] + HCO3-_[ext] => Na+_[cyt] + HCO3-_[cyt]	-	C00288_[ext] + C01330_[ext] => C00288_[cyt] + C01330_[cyt]	Transport	A	Shibata et al. 2002
R675	sll0834	-	Na+_[ext] + HCO3-_[ext] => Na+_[cyt] + HCO3-_[cyt]	-	C00288_[ext] + C01330_[ext] => C00288_[cyt] + C01330_[cyt]	Transport	A	Price et al. 2004
R676	sll0771	-	H+_[ext] + D-Glucose_[ext] => H+_[cyt] + D-Glucose_[cyt]	-	C00080_[ext] + C00031_[ext] => C00080_[cyt] + C00031_[cyt]	Transport	A
R677	sll1270, slr1735	3.6.3.-	ATP_[cyt] + H2O_[cyt] + L-Glutamine_[ext] => ADP_[cyt] + Orthophosphate_[cyt] + L-Glutamine_[cyt]	-	C00064_[ext] + C00002_[cyt] + C00001_[cyt] => C00064_[cyt] + C00008_[cyt] + C00009_[cyt]	Transport	A	Quintero et al. 2001
R678	sll1270, slr1735	3.6.3.-	ATP_[cyt] + H2O_[cyt] + L-Arginine_[ext] => ADP_[cyt] + Orthophosphate_[cyt] + L-Arginine_[cyt]	-	C00062_[ext] + C00002_[cyt] + C00001_[cyt] => C00062_[cyt] + C00008_[cyt] + C00009_[cyt]	Transport	A	Quintero et al. 2001
R679	sll1102, sll1103, sll1104	-	Na+_[ext] + L-Glutamate_[ext] => Na+_[cyt] + L-Glutamate_[cyt]	-	C00025_[ext] + C01330_[ext] => C00025_[cyt] + C01330_[cyt]	Transport	A	Quintero et al. 2001
R680	slr1145	-	Na+_[ext] + L-Glutamate_[ext] => Na+_[cyt] + L-Glutamate_[cyt]	-	C00025_[ext] + C01330_[ext] => C00025_[cyt] + C01330_[cyt]	Transport	A	Quintero et al. 2001
R681	slr0467, slr0559, sll0146, slr0949, slr1881	-	ATP_[cyt] + H2O_[cyt] + L-Histidine_[ext] => ADP_[cyt] + Orthophosphate_[cyt] + L-Histidine_[cyt]	-	C00135_[ext] + C00002_[cyt] + C00001_[cyt] => C00135_[cyt] + C00008_[cyt] + C00009_[cyt]	Transport	A
R682	slr0447, slr1200, slr1201, sll0764, sll0374	-	ATP_[cyt] + H2O_[cyt] + Urea_[ext] => ADP_[cyt] + Urea_[cyt] + Orthophosphate_[cyt]	-	C00002_[cyt] + C00001_[cyt] + C00086_[ext] => C00008_[cyt] + C00009_[cyt] + C00086_[cyt]	Transport	A
R683	sll0473, sll1080, sll1081, sll1082	-	ATP_[cyt] + H2O_[cyt] + Nitrate_[ext] => ADP_[cyt] + Nitrate_[cyt] + Orthophosphate_[cyt]	-	C00002_[cyt] + C00001_[cyt] + C00244_[ext] => C00008_[cyt] + C00009_[cyt] + C00244_[cyt]	Transport	A
R684	sll1450, sll1451, sll1452, sll1453	-	ATP_[cyt] + H2O_[cyt] + Nitrate_[ext] => ADP_[cyt] + Nitrate_[cyt] + Orthophosphate_[cyt]	-	C00002_[cyt] + C00001_[cyt] + C00244_[ext] => C00008_[cyt] + C00009_[cyt] + C00244_[cyt]	Transport	A	Flores et al.2005
R685	sll0108	-	NH4+_[ext] => NH4+_[cyt]	-	C01342_[ext] => C01342_[cyt]	Transport	A	Siewe et al. 1996
R686	sll0537	-	NH4+_[ext] => NH4+_[cyt]	-	C01342_[ext] => C01342_[cyt]	Transport	A	Siewe et al. 1996
R687	sll1017	-	NH4+_[ext] => NH4+_[cyt]	-	C01342_[ext] => C01342_[cyt]	Transport	A	Siewe et al. 1996
R688	slr1452, slr1453, slr1454, slr1455	3.6.3.25	ATP_[cyt] + H2O_[cyt] + Sulfate_[ext] => ADP_[cyt] + Orthophosphate_[cyt] + Sulfate_[cyt]	R00086	C00002_[cyt] + C00001_[cyt] + C00059_[ext] => C00008_[cyt] + C00009_[cyt] + C00059_[cyt]	Transport	A
R689	slr0096	-	Sulfate_[ext] => Sulfate_[cyt]	-	C00059_[ext] => C00059_[cyt]	Transport	A
R690	sll0540, sll0679, sll0680, sll0681, sll0682, sll0683, sll0684	3.6.3.27	ATP_[cyt] + H2O_[cyt] + Orthophosphate_[ext] => ADP_[cyt] + 2 Orthophosphate_[cyt]	-	C00002_[cyt] + C00001_[cyt] + C00009_[ext] => C00008_[cyt] + 2 C00009_[cyt]	Transport	A	Suzuki et al. 2004
R691	slr1247, slr1248, slr1249, slr1250	3.6.3.27	ATP_[cyt] + H2O_[cyt] + Orthophosphate_[ext] => ADP_[cyt] + 2 Orthophosphate_[cyt]	-	C00002_[cyt] + C00001_[cyt] + C00009_[ext] => C00008_[cyt] + 2 C00009_[cyt]	Transport	A	Suzuki et al. 2004
R692	slr1316, slr1317, slr1318, slr1319, sll1202, slr1491, slr1492	3.6.3.34	ATP_[cyt] + H2O_[cyt] + Iron chelate_[ext] => ADP_[cyt] + Orthophosphate_[cyt] + Iron chelate_[cyt]	-	C06704_[ext] + C00002_[cyt] + C00001_[cyt] => C06704_[cyt] + C00008_[cyt] + C00009_[cyt]	Transport	A
R693	sll1598, sll1599, sll1600	-	ATP_[cyt] + H2O_[cyt] + Manganese_[ext] => ADP_[cyt] + Orthophosphate_[cyt] + Manganese_[cyt]	-	C00034_[ext] + C00002_[cyt] + C00001_[cyt] => C00034_[cyt] + C00008_[cyt] + C00009_[cyt]	Transport	A
R694	slr1728, slr1729, slr1730, slr1731	3.6.3.12	ATP_[cyt] + H2O_[cyt] + K+_[ext] => ADP_[cyt] + Orthophosphate_[cyt] + K+_[cyt]	-	C00238_[ext] + C00002_[cyt] + C00001_[cyt] => C00238_[cyt] + C00008_[cyt] + C00009_[cyt]	Transport	A
R695	sll0493, slr1508, slr1509	-	K+_[ext] + Na+_[cyt] => Na+_[ext] + K+_[cyt]	-	C00238_[ext] + C01330_[cyt] => C00238_[cyt] + C01330_[ext]	Transport	A	Matsuda et al. 2004
R696	slr0798	3.6.3.-	ATP_[cyt] + H2O_[cyt] + Zn2+_[ext] => ADP_[cyt] + Orthophosphate_[cyt] + Zn2+_[cyt]	-	C00038_[ext] + C00002_[cyt] + C00001_[cyt] => C00038_[cyt] + C00008_[cyt] + C00009_[cyt]	Transport	A
R697	slr2043, slr2044, slr2045	3.6.3.-	ATP_[cyt] + H2O_[cyt] + Zn2+_[ext] => ADP_[cyt] + Orthophosphate_[cyt] + Zn2+_[cyt]	-	C00038_[ext] + C00002_[cyt] + C00001_[cyt] => C00038_[cyt] + C00008_[cyt] + C00009_[cyt]	Transport	A
R698	sll0383, sll0384, sll0385, slr1978, sll1623, slr0354	-	ATP_[cyt] + H2O_[cyt] + Nickel_[ext] => ADP_[cyt] + Orthophosphate_[cyt] + Nickel_[cyt]	-	C00291_[ext] + C00002_[cyt] + C00001_[cyt] => C00291_[cyt] + C00008_[cyt] + C00009_[cyt]	Transport	A
R699	sll0383, sll0384, sll0385, slr1978, sll1623, slr0354	-	ATP_[cyt] + H2O_[cyt] + Co2+_[ext] => ADP_[cyt] + Orthophosphate_[cyt] + Co2+_[cyt]	-	C00175_[ext] + C00002_[cyt] + C00001_[cyt] => C00175_[cyt] + C00008_[cyt] + C00009_[cyt]	Transport	A
R700	slr0797	-	ATP_[cyt] + H2O_[cyt] + Co2+_[ext] => ADP_[cyt] + Orthophosphate_[cyt] + Co2+_[cyt]	-	C00175_[ext] + C00002_[cyt] + C00001_[cyt] => C00175_[cyt] + C00008_[cyt] + C00009_[cyt]	Transport	A
R701	slr1392	-	GTP_[cyt] + H2O_[cyt] + Fe2+_[ext] => GDP_[cyt] + Orthophosphate_[cyt] + Fe2+_[cyt]	-	C14818_[ext] + C00044_[cyt] + C00001_[cyt] => C14818_[cyt] + C00035_[cyt] + C00009_[cyt]	Transport	A	Katoh et al. 2001
R702	sll0507	-	Magnesium_[ext] => Magnesium_[cyt]	-	C00305_[ext] => C00305_[cyt]	Transport	A
R703	sll0671	-	Magnesium_[ext] => Magnesium_[cyt]	-	C00305_[ext] => C00305_[cyt]	Transport	A
R704	slr0014, slr1216	-	ATP_[cyt] + H2O_[cyt] + Magnesium_[ext] => ADP_[cyt] + Orthophosphate_[cyt] + Magnesium_[cyt]	-	C00305_[ext] + C00002_[cyt] + C00001_[cyt] => C00305_[cyt] + C00008_[cyt] + C00009_[cyt]	Transport	A
R705	sll0672	3.6.3.8	ATP_[cyt] + H2O_[cyt] + Ca2+_[ext] => ADP_[cyt] + Orthophosphate_[cyt] + Ca2+_[cyt]	-	C00076_[ext] + C00002_[cyt] + C00001_[cyt] => C00076_[cyt] + C00008_[cyt] + C00009_[cyt]	Transport	A
R706	slr1336	-	Ca2+_[ext] + H+_[cyt] <=> H+_[ext] + Ca2+_[cyt]	-	C00080_[cyt] + C00076_[ext] <=> C00080_[ext] + C00076_[cyt]	Transport	A
R707	sll0273	-	Na+_[ext] + H+_[cyt] <=> H+_[ext] + Na+_[cyt]	-	C00080_[cyt] + C01330_[ext] <=> C00080_[ext] + C01330_[cyt]	Transport	A
R708	sll1920	3.6.3.4	ATP_[cyt] + H2O_[cyt] + Cu2+_[ext] => ADP_[cyt] + Orthophosphate_[cyt] + Cu2+_[cyt]	-	C00070_[ext] + C00002_[cyt] + C00001_[cyt] => C00070_[cyt] + C00008_[cyt] + C00009_[cyt]	Transport	A
R709	sll0738, sll0739	3.6.3.29	1 Molybdate_[ext] + 1 ATP_[cyt] + H2O_[cyt] => 1 Molybdate_[cyt] + 1 ADP_[cyt] + Orthophosphate_[cyt]	-	C06232_[ext] + C00002_[cyt] + C00001_[cyt] => C06232_[cyt] + C00008_[cyt] + C00009_[cyt]	Transport	A
R710	sll0237, sll0238, sll0240	3.6.3.30	ATP_[cyt] + H2O_[cyt] + Fe3+_[ext] => ADP_[cyt] + Orthophosphate_[cyt] + Fe3+_[cyt]	-	C14819_[ext] + C00002_[cyt] + C00001_[cyt] => C14819_[cyt] + C00008_[cyt] + C00009_[cyt]	Transport	A
R711	slr1295, slr0513, slr0327, sll1878	3.6.3.30	ATP_[cyt] + H2O_[cyt] + Fe3+_[ext] => ADP_[cyt] + Orthophosphate_[cyt] + Fe3+_[cyt]	-	C14819_[ext] + C00002_[cyt] + C00001_[cyt] => C14819_[cyt] + C00008_[cyt] + C00009_[cyt]	Transport	A
R712	slr0401	-	ATP_[cyt] + H2O_[cyt] + Putrescine_[ext] => ADP_[cyt] + Orthophosphate_[cyt] + Putrescine_[cyt]	-	C00134_[ext] + C00002_[cyt] + C00001_[cyt] => C00134_[cyt] + C00008_[cyt] + C00009_[cyt]	Transport	B	Raksajit et al. 2009; Brandt et al. 2010
R713	slr0401	-	ATP_[cyt] + H2O_[cyt] + Spermidine_[ext] => ADP_[cyt] + Orthophosphate_[cyt] + Spermidine_[cyt]	-	C00315_[ext] + C00002_[cyt] + C00001_[cyt] => C00315_[cyt] + C00008_[cyt] + C00009_[cyt]	Transport	B	Raksajit et al. 2009; Brandt et al. 2010
R714	-	-	5-Deoxy-D-ribose_[cyt] => 5-Deoxy-D-ribose_[ext]	-	E19_[cyt] => E19_[ext]	Transport	-	Sink for 5-Deoxy-D-ribose
R715	-	-	S-Methyl-5-thio-D-ribulose 1-phosphate_[cyt] => S-Methyl-5-thio-D-ribulose 1-phosphate_[ext]	-	C04582_[cyt] => C04582_[ext]	Transport	-	Sink for S-Methyl-5-thio-D-ribulose 1-phosphate
R716	-	-	4-Methylphenol_[cyt] => 4-Methylphenol_[ext]	-	C01468_[cyt] => C01468_[ext]	Transport	-	Sink for 4-Methylphenol
R717	-	-	Carbon monoxide_[cyt] => Carbon monoxide_[ext]	-	C00237_[cyt] => C00237_[ext]	Transport	-	Sink for Carbon monoxide
R718	-	-	H+_[cyt] <=> H+_[cax]	-	C00080_[cyt] <=> C00080_[cax]	Transport	-	Exchange cytosol <-> carboxysome
R719	-	-	Oxygen_[cyt] => Oxygen_[cax]	-	C00007_[cyt] => C00007_[cax]	Transport	-	Exchange cytosol <-> carboxysome
R720	-	-	HCO3-_[cyt] => HCO3-_[cax]	-	C00288_[cyt] => C00288_[cax]	Transport	-	Exchange cytosol <-> carboxysome
R721	-	-	D-Ribulose 1,5-bisphosphate_[cyt] => D-Ribulose 1,5-bisphosphate_[cax]	-	C01182_[cyt] => C01182_[cax]	Transport	-	Exchange cytosol <-> carboxysome
R722	-	-	3-Phospho-D-glycerate_[cax] => 3-Phospho-D-glycerate_[cyt]	-	C00197_[cax] => C00197_[cyt]	Transport	-	Exchange cytosol <-> carboxysome
R723	-	-	2-Phosphoglycolate_[cax] => 2-Phosphoglycolate_[cyt]	-	C00988_[cax] => C00988_[cyt]	Transport	-	Exchange cytosol <-> carboxysome
R724	slr2057	-	1 H2O_[cyt] <=> 1 H2O_[tll]	-	C00001_[cyt] <=> C00001_[tll]	Transport	-	Exchange cytosol <-> thylakoid
R725	-	-	1 Oxygen_[tll] <=> Oxygen_[cyt]	-	C00007_[tll] <=> C00007_[cyt]	Transport	-	Exchange cytosol <-> thylakoid
R726	-	-	1 Plastoquinone-9_[cyt] => Plastoquinone-9_[tlm]	-	C10385_[cyt] => C10385_[tlm]	Transport	-	Exchange cytosol <-> thylakoid
R727	slr2057	-	1 H2O_[pps] <=> 1 H2O_[cyt]	-	C00001_[pps] <=> C00001_[cyt]	Transport	-	Exchange cytosol <-> periplasmatic space
R728	-	-	1 Oxygen_[pps] <=> 1 Oxygen_[cyt]	-	C00007_[pps] <=> C00007_[cyt]	Transport	-	Exchange cytosol <-> periplasmatic space
R729	-	-	1 Plastoquinone-9_[cyt] => Plastoquinone-9_[cym]	-	C10385_[cyt] => C10385_[cym]	Transport	-	Exchange cytosol <-> periplasmatic space
R730	-	1.2.1.72	D-Erythrose 4-phosphate_[cyt] + NAD+_[cyt] + H2O_[cyt] => 4-Phospho-D-erythronate_[cyt] + NADH_[cyt] + H+_[cyt]	R01825	C00279_[cyt] + C00003_[cyt] + C00001_[cyt] => C03393_[cyt] + C00004_[cyt] + C00080_[cyt]	Vitamin B6	E	No genes could be identified; Mittenhuber 2001
R731	-	1.1.1.290	4-Phospho-D-erythronate_[cyt] + NAD+_[cyt] => 2-Oxo-3-hydroxy-4-phosphobutanoate_[cyt] + NADH_[cyt] + H+_[cyt]	R04210	C03393_[cyt] + C00003_[cyt] => C06054_[cyt] + C00004_[cyt] + C00080_[cyt]	Vitamin B6	E	No genes could be identified; Mittenhuber 2001
R732	-	2.6.1.52	O-Phospho-4-hydroxy-L-threonine_[cyt] + 2-Oxoglutarate_[cyt] <=> 2-Oxo-3-hydroxy-4-phosphobutanoate_[cyt] + L-Glutamate_[cyt]	R05085	C06055_[cyt] + C00026_[cyt] <=> C06054_[cyt] + C00025_[cyt]	Vitamin B6	E	No genes could be identified; Mittenhuber 2001
R733	sll0660	1.1.1.262	O-Phospho-4-hydroxy-L-threonine_[cyt] + NAD+_[cyt] => 2-Amino-3-oxo-4-phosphonooxybutyrate_[cyt] + NADH_[cyt] + H+_[cyt]	R05681	C06055_[cyt] + C00003_[cyt] => C07335_[cyt] + C00004_[cyt] + C00080_[cyt]	Vitamin B6	A
R734	-	-	2-Amino-3-oxo-4-phosphonooxybutyrate_[cyt] => 3-Amino-2-oxopropyl phosphate_[cyt] + CO2_[cyt]	R07406	C07335_[cyt] => C11638_[cyt] + C00011_[cyt]	Vitamin B6	A	spontaneous
R735	slr1779	2.6.99.2	3-Amino-2-oxopropyl phosphate_[cyt] + 1-Deoxy-D-xylulose 5-phosphate_[cyt] => Pyridoxine phosphate_[cyt] + Orthophosphate_[cyt] + 2 H2O_[cyt]	R05838	C11638_[cyt] + C11437_[cyt] <=> C00627_[cyt] + C00009_[cyt] + 2 C00001_[cyt]	Vitamin B6	A
R736	sll1440	1.4.3.5	Pyridoxine phosphate_[cyt] + Oxygen_[cyt] <=> Hydrogen peroxide_[cyt] + Pyridoxal phosphate_[cyt]	R00278	C00627_[cyt] + C00007_[cyt] <=> C00027_[cyt] + C00018_[cyt]	Vitamin B6	A
R737	sll0378	2.1.1.107	2 S-Adenosyl-L-methionine_[cyt] + Uroporphyrinogen III_[cyt] => 2 S-Adenosyl-L-homocysteine_[cyt] + Precorrin 2_[cyt]	R03194	2 C00019_[cyt] + C01051_[cyt] => 2 C00021_[cyt] + C02463_[cyt]	Vitamin B12	A
R738	slr1879	2.1.1.130	S-Adenosyl-L-methionine_[cyt] + Precorrin 2_[cyt] => S-Adenosyl-L-homocysteine_[cyt] + Precorrin 3A_[cyt]	R03948	C00019_[cyt] + C02463_[cyt] => C00021_[cyt] + C05772_[cyt]	Vitamin B12	A
R739	-	1.14.13.83	Precorrin 3A_[cyt] + Oxygen_[cyt] + NADH_[cyt] + H+_[cyt] => Precorrin 3B_[cyt] + NAD+_[cyt] + H2O_[cyt]	R05217	C05772_[cyt] + C00007_[cyt] + C00004_[cyt] + C00080_[cyt] => C06406_[cyt] + C00003_[cyt] + C00001_[cyt]	Vitamin B12	E	No genes could be identified for a Precorrin-3B synthase; Rodionov et al. 2003
R740	slr0969	2.1.1.131	S-Adenosyl-L-methionine_[cyt] + Precorrin 3B_[cyt] => S-Adenosyl-L-homocysteine_[cyt] + Precorrin 4_[cyt]	R05180	C00019_[cyt] + C06406_[cyt] => C00021_[cyt] + C06407_[cyt]	Vitamin B12	A
R741	slr0239	2.1.1.133	S-Adenosyl-L-methionine_[cyt] + Precorrin 4_[cyt] => S-Adenosyl-L-homocysteine_[cyt] + Precorrin 5_[cyt]	R05181	C00019_[cyt] + C06407_[cyt] => C00021_[cyt] + C06416_[cyt]	Vitamin B12	A
R742	slr1538	2.1.1.152	Precorrin 6X_[cyt] + Acetate_[cyt] + S-Adenosyl-L-homocysteine_[cyt] <= Precorrin 5_[cyt] + S-Adenosyl-L-methionine_[cyt] + H2O_[cyt]	R05219	C06320_[cyt] + C00033_[cyt] + C00021_[cyt] <= C06416_[cyt] + C00019_[cyt] + C00001_[cyt]	Vitamin B12	C	BLAST search: identity 57.1 %, score 356, E-value e-104 to Cobalt-precorrin-6A synthase from Trichodesmium erythraeum IMS101 cobF
R743	slr0252	1.3.1.54	Precorrin 6Y_[cyt] + NADP+_[cyt] <=> Precorrin 6X_[cyt] + NADPH_[cyt] + H+_[cyt]	R05150	C06319_[cyt] + C00006_[cyt] <=> C06320_[cyt] + C00005_[cyt] + C00080_[cyt]	Vitamin B12	A
R744	sll0099	2.1.1.132	2 S-Adenosyl-L-methionine_[cyt] + Precorrin 6Y_[cyt] => 2 S-Adenosyl-L-homocysteine_[cyt] + Precorrin 8X_[cyt] + CO2_[cyt]	R05149	2 C00019_[cyt] + C06319_[cyt] => 2 C00021_[cyt] + C06408_[cyt] + C00011_[cyt]	Vitamin B12	A
R745	slr1368	2.1.1.132	2 S-Adenosyl-L-methionine_[cyt] + Precorrin 6Y_[cyt] => 2 S-Adenosyl-L-homocysteine_[cyt] + Precorrin 8X_[cyt] + CO2_[cyt]	R05149	2 C00019_[cyt] + C06319_[cyt] => 2 C00021_[cyt] + C06408_[cyt] + C00011_[cyt]	Vitamin B12	A
R746	sll0794	5.4.1.2	Precorrin 8X_[cyt] <=> Hydrogenobyrinate_[cyt]	R05177	C06408_[cyt] <=> C06399_[cyt]	Vitamin B12	A
R747	sll0916	5.4.1.2	Precorrin 8X_[cyt] <=> Hydrogenobyrinate_[cyt]	R05177	C06408_[cyt] <=> C06399_[cyt]	Vitamin B12	A
R748	slr1467	5.4.1.2	Precorrin 8X_[cyt] <=> Hydrogenobyrinate_[cyt]	R05177	C06408_[cyt] <=> C06399_[cyt]	Vitamin B12	A
R749	sll1501	6.3.5.9	Hydrogenobyrinate_[cyt] + 2 L-Glutamine_[cyt] + 2 ATP_[cyt] + 2 H2O_[cyt] => Hydrogenobyrinate a,c diamide_[cyt] + 2 Orthophosphate_[cyt] + 2 L-Glutamate_[cyt] + 2 ADP_[cyt]	R05224	C06399_[cyt] + 2 C00064_[cyt] + 2 C00002_[cyt] + 2 C00001_[cyt] => C06503_[cyt] + 2 C00009_[cyt] + 2 C00025_[cyt] + 2 C00008_[cyt]	Vitamin B12	A
R750	sll1890	6.6.1.2	Hydrogenobyrinate a,c diamide_[cyt] + Cobalt ion_[cyt] + ATP_[cyt] + H2O_[cyt] => Cob(II)yrinate a,c diamide_[cyt] + Orthophosphate_[cyt] + ADP_[cyt] + H+_[cyt]	R05227	C06503_[cyt] + C00175_[cyt] + C00002_[cyt] + C00001_[cyt] => C06504_[cyt] + C00009_[cyt] + C00008_[cyt] + C00080_[cyt]	Vitamin B12	A
R751	slr1211	6.6.1.2	Hydrogenobyrinate a,c diamide_[cyt] + Cobalt ion_[cyt] + ATP_[cyt] + H2O_[cyt] => Cob(II)yrinate a,c diamide_[cyt] + Orthophosphate_[cyt] + ADP_[cyt] + H+_[cyt]	R05227	C06503_[cyt] + C00175_[cyt] + C00002_[cyt] + C00001_[cyt] => C06504_[cyt] + C00009_[cyt] + C00008_[cyt] + C00080_[cyt]	Vitamin B12	D	slr2026 is coding for FoIP (2.5.1.15 ) which also can as a dihydropteroate reductase 1.5.1.3 ( at least in H. pylori); Levin et al. 2007
R752	slr0001	1.16.8.1	2 Cob(II)yrinate a,c diamide_[cyt] + Reduced FMN_[cyt] <=> 2 Cob(I)yrinate a,c diamide_[cyt] + FMN_[cyt] + 2 H+_[cyt]	R05218	2 C06504_[cyt] + C01847_[cyt] <=> 2 C06505_[cyt] + C00061_[cyt] + 2 C00080_[cyt]	Vitamin B12	C	BLAST search: identity 31 %, Score 57, E-value 4e-10 to 4-hydroxyphenylacetate 3-monooxygenase from B. melitensis which can act as a corrin reductase; Lawrence et al. 2008
R753	slr0260	2.5.1.17	Cob(I)yrinate a,c diamide_[cyt] + ATP_[cyt] + H+_[cyt] => Adenosyl cobyrinate a,c diamide_[cyt] + Triphosphate_[cyt]	R05220	C06505_[cyt] + C00002_[cyt] + C00080_[cyt] => C06506_[cyt] + C00536_[cyt]	Vitamin B12	A
R754	slr0618	6.3.5.10	Adenosyl cobyrinate a,c diamide_[cyt] + 4 L-Glutamine_[cyt] + 4 ATP_[cyt] + 4 H2O_[cyt] => Adenosyl cobyrinate hexaamide_[cyt] + 4 L-Glutamate_[cyt] + 4 Orthophosphate_[cyt] + 4 ADP_[cyt]	R05225	C06506_[cyt] + 4 C00064_[cyt] + 4 C00002_[cyt] + 4 C00001_[cyt] => C06507_[cyt] + 4 C00025_[cyt] + 4 C00009_[cyt] + 4 C00008_[cyt]	Vitamin B12	A	multi-step reaction
R755	slr1925	6.3.1.10	Adenosyl cobyrinate hexaamide_[cyt] + D-1-Aminopropan-2-ol O-phosphate_[cyt] + ATP_[cyt] => Adenosyl cobinamide phosphate_[cyt] + ADP_[cyt] + Orthophosphate_[cyt]	R06529	C06507_[cyt] + C04122_[cyt] + C00002_[cyt] => C06509_[cyt] + C00008_[cyt] + C00009_[cyt]	Vitamin B12	A
R756	slr0216	2.7.7.62	Adenosyl cobinamide phosphate_[cyt] + GTP_[cyt] => Adenosine-GDP-cobinamide_[cyt] + Diphosphate_[cyt]	R05222	C06509_[cyt] + C00044_[cyt] => C06510_[cyt] + C00013_[cyt]	Vitamin B12	A
R757	sll1500	2.4.2.21	Nicotinate D-ribonucleotide_[cyt] + Dimethylbenzimidazole_[cyt] => Nicotinate_[cyt] + N1-(5-Phospho-alpha-D-ribosyl)-5,6-dimethylbenzimidazole_[cyt] + H+_[cyt]	R04148	C01185_[cyt] + C03114_[cyt] => C00253_[cyt] + C04778_[cyt] + C00080_[cyt]	Vitamin B12	C	BLAST search: identity 61 %, score 439, E-value e-124 to Nicotinate-nucleotide-dimethylbenzimidazole phosphoribosyltransferase from Cyanothece sp. PCC 8801
R758	slr1124	3.1.3.73	N1-(5-Phospho-alpha-D-ribosyl)-5,6-dimethylbenzimidazole_[cyt] + H2O_[cyt] => alpha-Ribazole_[cyt] + Orthophosphate_[cyt]	R04594	C04778_[cyt] + C00001_[cyt] => C05775_[cyt] + C00009_[cyt]	Vitamin B12	C	BLAST search: identity 46 %, score 397, E-value e-112 to putative alpha-ribazole-5'-P phosphatase von Synechococcus sp. CC9902
R759	slr0636	2.7.8.26	Cobamide coenzyme_[cyt] + GMP_[cyt] + H+_[cyt] <= Adenosine-GDP-cobinamide_[cyt] + alpha-Ribazole_[cyt]	R05223	C00194_[cyt] + C00144_[cyt] + C00080_[cyt] <= C06510_[cyt] + C05775_[cyt]	Vitamin B12	A
							-	reaction needed for modeling
							A	Based on multiple sources of information
							B	Reference to literature
							C	Corresponding gene identified by a BLAST search
							D	Transferred function e.g. from enzymes belonging to no phylum related organisms
							E	No gene could be identified but essential step for related synthesis pathway
Additional reactions used for modelling
	slr0009, slr0012	4.1.1.39	D-Ribulose 1,5-bisphosphate_[cax] + CO2_[cax] + H2O_[cax] => 2 3-Phospho-D-glycerate_[cax]	R00024	C01182_[cax] + C00011_[cax] + C00001_[cax] => 2 C00197_[cax]	RuBisCO reaction with separted carbon fixation and photorespiration
	slr0009, slr0012	4.1.1.39	D-Ribulose 1,5-bisphosphate_[cax] + Oxygen_[cax] => 3-Phospho-D-glycerate_[cax] + 2-Phosphoglycolate_[cax]	R03140	C01182_[cax] + C00007_[cax] => C00197_[cax] + C00988_[cax]	RuBisCO reaction with separted carbon fixation and photorespiration
	-	4.1.3.1	Isocitrate_[cyt] => Succinate_[cyt] + Glyoxylate_[cyt]	R00479	C00311_[cyt] => C00042_[cyt] + C00048_[cyt]	GLX-Shunt
	-	2.3.3.9	(S)-Malate_[cyt] + CoA_[cyt] <= Acetyl-CoA_[cyt] + H2O_[cyt] + Glyoxylate_[cyt]	R00472	C00149_[cyt] + C00010_[cyt] <= C00024_[cyt] + C00001_[cyt] + C00048_[cyt]	GLX-Shunt
	-	1.2.4.2	2-Oxoglutarate_[cyt] + CoA_[cyt] + NAD+_[cyt] => Succinyl-CoA_[cyt] + CO2_[cyt] + NADH_[cyt] + H+_[cyt]	R08549	C00026_[cyt] + C00010_[cyt] + C00003_[cyt] => C00091_[cyt] + C00011_[cyt] + C00004_[cyt] + C00080_[cyt]	OGDH

## Sheet: metabolites
						pH 7.0
entry	kegg	comp.	name	chebi	uncharged formula	formula	charge	external
B0_[ext]	-	ext	Biomass	-	R	-	-	True
B1_[cyt]	-	cyt	Protein component of biomass	-	R	-	-	False
B2_[cyt]	-	cyt	DNA component of biomass	-	R	-	-	False
B3_[cyt]	-	cyt	RNA component of biomass	-	R	-	-	False
B4_[cyt]	-	cyt	Cell wall component of biomass	-	R	-	-	False
B5_[cyt]	-	cyt	Lipid component of biomass	-	R	-	-	False
B6_[cyt]	-	cyt	Soluble pool component of biomass	-	R	-	-	False
B7_[cyt]	-	cyt	inorganic Ion component of biomass	-	R	-	-	False
B8_[cyt]	-	cyt	Pigment component of biomass	-	R	-	-	False
C00001_[cax]	C00001	cax	H2O	15377	H2O	H2O	0	False
C00001_[cyt]	C00001	cyt	H2O	15377	H2O	H2O	0	False
C00001_[ext]	C00001	ext	H2O	15377	H2O	H2O	0	True
C00001_[pps]	C00001	pps	H2O	15377	H2O	H2O	0	False
C00001_[tll]	C00001	tll	H2O	15377	H2O	H2O	0	False
C00002_[cyt]	C00002	cyt	ATP	15422	C10H16N5O13P3	C10H13N5O13P3	-3	False
C00003_[cyt]	C00003	cyt	NAD+	15846	C21H28N7O14P2	C21H26N7O14P2	-1	False
C00004_[cyt]	C00004	cyt	NADH	16908	C21H29N7O14P2	C21H27N7O14P2	-2	False
C00005_[cyt]	C00005	cyt	NADPH	16474	C21H30N7O17P3	C21H26N7O17P3	-4	False
C00006_[cyt]	C00006	cyt	NADP+	18009	C21H29N7O17P3	C21H25N7O17P3	-3	False
C00007_[cax]	C00007	cax	Oxygen	15379	O2	O2	0	False
C00007_[cyt]	C00007	cyt	Oxygen	15379	O2	O2	0	False
C00007_[ext]	C00007	ext	Oxygen	15379	O2	O2	0	True
C00007_[pps]	C00007	pps	Oxygen	15379	O2	O2	0	False
C00007_[tll]	C00007	tll	Oxygen	15379	O2	O2	0	False
C00008_[cyt]	C00008	cyt	ADP	16761	C10H15N5O10P2	C10H13N5O10P2	-2	False
C00009_[cyt]	C00009	cyt	Orthophosphate	18367	H3PO4	HO4P	-2	False
C00009_[ext]	C00009	ext	Orthophosphate	18367	H3PO4	HO4P	-2	True
C00010_[cyt]	C00010	cyt	CoA	15346	C21H36N7O16P3S	C21H32N7O16P3S	-4	False
C00011_[cax]	C00011	cax	CO2	16526	CO2	CO2	0	False
C00011_[cyt]	C00011	cyt	CO2	16526	CO2	CO2	0	False
C00011_[ext]	C00011	ext	CO2	16526	CO2	CO2	0	True
C00011_[pps]	C00011	pps	CO2	16526	CO2	CO2	0	False
C00011_[tll]	C00011	tll	CO2	16526	CO2	CO2	0	False
C00013_[cyt]	C00013	cyt	Diphosphate	29888	P2H4O7	HO7P2	-3	False
C00014_[cyt]	C00014	cyt	NH3	16134	NH3	H4N	1	False
C00015_[cyt]	C00015	cyt	UDP	17659	C9H14N2O12P2	C9H12N2O12P2	-2	False
C00016_[cyt]	C00016	cyt	FAD	16238	C27H33N9O15P2	C27H30N9O15P2	-3	False
C00018_[cyt]	C00018	cyt	Pyridoxal phosphate	18405	C8H10NO6P	C8H8NO6P	-2	False
C00019_[cyt]	C00019	cyt	S-Adenosyl-L-methionine	15414	C15H22N6O5S	C15H23N6O5S	1	False
C00020_[cyt]	C00020	cyt	AMP	16027	C10H14N5O7P	C10H12N5O7P	-2	False
C00021_[cyt]	C00021	cyt	S-Adenosyl-L-homocysteine	16680	C14H20N6O5S	C14H20N6O5S	0	False
C00022_[cyt]	C00022	cyt	Pyruvate	32816	C3H4O3	C3H3O3	-1	False
C00024_[cyt]	C00024	cyt	Acetyl-CoA	15351	C23H38N7O17P3S	C23H34N7O17P3S	-4	False
C00025_[cyt]	C00025	cyt	L-Glutamate	16015	C5H9NO4	C5H8NO4	-1	False
C00025_[ext]	C00025	ext	L-Glutamate	16015	C5H9NO4	C5H8NO4	-1	True
C00026_[cyt]	C00026	cyt	2-Oxoglutarate	30915	C5H6O5	C5H4O5	-2	False
C00027_[cyt]	C00027	cyt	H2O2	16240	H2O2	H2O2	0	False
C00029_[cyt]	C00029	cyt	UDP-glucose	18066	C15H24N2O17P2	C15H22N2O17P2	-2	False
C00031_[cyt]	C00031	cyt	D-Glucose	4167	C6H12O6	C6H12O6	0	False
C00031_[ext]	C00031	ext	D-Glucose	4167	C6H12O6	C6H12O6	0	True
C00032_[cyt]	C00032	cyt	Heme	17627	C34H32FeN4O4	C34FeH32N4O4	0	False
C00033_[cyt]	C00033	cyt	Acetate	15366	C2H4O2	C2H3O2	-1	False
C00034_[cyt]	C00034	cyt	Manganese	18291	Mn	Mn	0	False
C00034_[ext]	C00034	ext	Manganese	18291	Mn	Mn	0	True
C00035_[cyt]	C00035	cyt	GDP	17552	C10H15N5O11P2	C10H13N5O11P2	-2	False
C00036_[cyt]	C00036	cyt	Oxaloacetate	30744	C4H4O5	C4H2O5	-2	False
C00037_[cyt]	C00037	cyt	Glycine	15428	C2H5NO2	C2H5NO2	0	False
C00038_[cyt]	C00038	cyt	Zinc	29105	Zn	Zn	2	False
C00038_[ext]	C00038	ext	Zinc	29105	Zn	Zn	2	True
C00041_[cyt]	C00041	cyt	L-Alanine	16977	C3H7NO2	C3H7NO2	0	False
C00042_[cyt]	C00042	cyt	Succinate	15741	C4H6O4	C4H4O4	-2	False
C00043_[cyt]	C00043	cyt	UDP-N-acetyl-D-glucosamine	16264	C17H27N3O17P2	C17H25N3O17P2	-2	False
C00044_[cyt]	C00044	cyt	GTP	15996	C10H16N5O14P3	C10H13N5O14P3	-3	False
C00047_[cyt]	C00047	cyt	L-Lysine	18019	C6H14N2O2	C6H15N2O2	1	False
C00048_[cyt]	C00048	cyt	Glyoxylate	16891	C2H2O3	C2HO3	-1	False
C00049_[cyt]	C00049	cyt	L-Aspartate	17053	C4H7NO4	C4H6NO4	-1	False
C00051_[cyt]	C00051	cyt	Glutathione	16856	C10H17N3O6S	C10H16N3O6S	-1	False
C00052_[cyt]	C00052	cyt	UDP-D-galactose	18307	C15H24N2O17P2	C15H22N2O17P2	-2	False
C00053_[cyt]	C00053	cyt	3'-Phosphoadenylyl sulfate	17980	C10H15N5O13P2S	C10H11N5O13P2S	-4	False
C00054_[cyt]	C00054	cyt	Adenosine 3',5'-bisphosphate	17985	C10H15N5O10P2	C10H11N5O10P2	-4	False
C00055_[cyt]	C00055	cyt	CMP	17361	C9H14N3O8P	C9H12N3O8P	-2	False
C00058_[cyt]	C00058	cyt	Formate	30751	CH2O2	CHO2	-1	False
C00059_[cyt]	C00059	cyt	Sulfate	16189	H2SO4	O4S	-2	False
C00059_[ext]	C00059	ext	Sulfate	16189	H2SO4	O4S	-2	True
C00061_[cyt]	C00061	cyt	FMN	17621	C17H21N4O9P	C17H18N4O9P	-3	False
C00062_[cyt]	C00062	cyt	L-Arginine	16467	C6H14N4O2	C6H15N4O2	1	False
C00062_[ext]	C00062	ext	L-Arginine	16467	C6H14N4O2	C6H15N4O2	1	True
C00063_[cyt]	C00063	cyt	CTP	17677	C9H16N3O14P3	C9H13N3O14P3	-3	False
C00064_[cyt]	C00064	cyt	L-Glutamine	18050	C5H10N2O3	C5H10N2O3	0	False
C00064_[ext]	C00064	ext	L-Glutamine	18050	C5H10N2O3	C5H10N2O3	0	True
C00065_[cyt]	C00065	cyt	L-Serine	17115	C3H7NO3	C3H7NO3	0	False
C00068_[cyt]	C00068	cyt	Thiamin diphosphate	9532	C12H19N4O7P2S	C12H17N4O7P2S	-1	False
C00070_[cyt]	C00070	cyt	Copper	28694	Cu	Cu	0	False
C00070_[ext]	C00070	ext	Copper	28694	Cu	Cu	0	True
C00073_[cyt]	C00073	cyt	L-Methionine	16643	C5H11NO2S	C5H11NO2S	0	False
C00074_[cyt]	C00074	cyt	Phosphoenolpyruvate	44897	C3H5O6P	C3H2O6P	-3	False
C00075_[cyt]	C00075	cyt	UTP	15713	C9H15N2O15P3	C9H12N2O15P3	-3	False
C00076_[cyt]	C00076	cyt	Calcium	29108	Ca	Ca	2	False
C00076_[ext]	C00076	ext	Calcium	29108	Ca	Ca	2	True
C00077_[cyt]	C00077	cyt	L-Ornithine	15729	C5H12N2O2	C5H13N2O2	1	False
C00078_[cyt]	C00078	cyt	L-Tryptophan	16828	C11H12N2O2	C11H12N2O2	0	False
C00079_[cyt]	C00079	cyt	L-Phenylalanine	17295	C9H11NO2	C9H11NO2	0	False
C00080_[cax]	C00080	cax	H+	15378	H	H	1	False
C00080_[cyt]	C00080	cyt	H+	15378	H	H	1	False
C00080_[ext]	C00080	ext	H+	15378	H	H	1	True
C00080_[pps]	C00080	pps	H+	15378	H	H	1	False
C00080_[tll]	C00080	tll	H+	15378	H	H	1	False
C00082_[cyt]	C00082	cyt	L-Tyrosine	17895	C9H11NO3	C9H11NO3	0	False
C00083_[cyt]	C00083	cyt	Malonyl-CoA	1553	C24H38N7O19P3S	C3H5O3	-1	False
C00084_[cyt]	C00084	cyt	Acetaldehyde	15343	C2H4O	C2H4O	0	False
C00085_[cyt]	C00085	cyt	D-Fructose 6-phosphate	15946	C6H13O9P	C6H11O9P	-2	False
C00086_[cyt]	C00086	cyt	Urea	16199	CH4N2O	CH4N2O	0	False
C00086_[ext]	C00086	ext	Urea	16199	CH4N2O	CH4N2O	0	True
C00088_[cyt]	C00088	cyt	Nitrite	16301	NO2-	NO2	-1	False
C00089_[cyt]	C00089	cyt	Sucrose	17992	C12H22O11	C12H22O11	0	False
C00091_[cyt]	C00091	cyt	Succinyl-CoA	15380	C25H40N7O19P3S	C25H35N7O19P3S	-5	False
C00092_[cyt]	C00092	cyt	D-Glucose 6-phosphate	4170	C6H13O9P	C6H11O9P	-2	False
C00093_[cyt]	C00093	cyt	sn-Glycerol 3-phosphate	15978	C3H9O6P	C3H7O6P	-2	False
C00094_[cyt]	C00094	cyt	Sulfite	48854	H2SO3	HO3S	-1	False
C00095_[cyt]	C00095	cyt	D-Fructose	15824	C6H12O6	C6H11O9P	-2	False
C00096_[cyt]	C00096	cyt	GDP-mannose	15820	C16H25N5O16P2	C16H23N5O16P2	-2	False
C00097_[cyt]	C00097	cyt	L-Cysteine	17561	C3H7NO2S	C3H7NO2S	0	False
C00099_[cyt]	C00099	cyt	beta-Alanine	16958	C3H7NO2	C3H7NO2	0	False
C00101_[cyt]	C00101	cyt	Tetrahydrofolate	15635	C19H23N7O6	C19H21N7O6	-2	False
C00103_[cyt]	C00103	cyt	D-Glucose 1-phosphate	16077	C6H13O9P	C6H11O9P	-2	False
C00105_[cyt]	C00105	cyt	UMP	16695	C9H13N2O9P	C9H11N2O9P	-2	False
C00108_[cyt]	C00108	cyt	Anthranilate	30754	C7H7NO2	C7H6NO2	-1	False
C00109_[cyt]	C00109	cyt	2-Oxobutanoate	30831	C4H6O3	C4H5O3	-1	False
C00111_[cyt]	C00111	cyt	Glycerone phosphate	16108	C3H7O6P	C3H5O6P	-2	False
C00112_[cyt]	C00112	cyt	CDP	17239	C9H15N3O11P2	C9H13N3O11P2	-2	False
C00116_[cyt]	C00116	cyt	Glycerol	17754	C3H8O3	C3H8O3	0	False
C00117_[cyt]	C00117	cyt	D-Ribose 5-phosphate	17797	C5H11O8P	C5H9O8P	-2	False
C00118_[cyt]	C00118	cyt	D-Glyceraldehyde 3-phosphate	29052	C3H7O6P	C3H5O6P	-2	False
C00119_[cyt]	C00119	cyt	5-Phospho-alpha-D-ribose 1-diphosphate	17111	C5H13O14P3	C5H9O14P3	-4	False
C00122_[cyt]	C00122	cyt	Fumarate	18012	C4H4O4	C4H2O4	-2	False
C00123_[cyt]	C00123	cyt	L-Leucine	15603	C6H13NO2	C6H13NO2	0	False
C00127_[cyt]	C00127	cyt	Glutathione disulfide	17858	C20H32N6O12S2	C20H30N6O12S2	-2	False
C00129_[cyt]	C00129	cyt	Isopentenyl diphosphate	16584	C5H12O7P2	C5H10O7P2	-2	False
C00130_[cyt]	C00130	cyt	IMP	17202	C10H13N4O8P	C10H11N4O8P	-2	False
C00131_[cyt]	C00131	cyt	dATP	16284	C10H16N5O12P3	C10H13N5O12P3	-3	False
C00133_[cyt]	C00133	cyt	D-Alanine	15570	C3H7NO2	C3H7NO2	0	False
C00134_[cyt]	C00134	cyt	Putrescine	17148	C4H12N2	C4H14N2	2	False
C00134_[ext]	C00134	ext	Putrescine	17148	C4H12N2	C4H14N2	2	True
C00135_[cyt]	C00135	cyt	L-Histidine	15971	C6H9N3O2	C6H9N3O2	0	False
C00135_[ext]	C00135	ext	L-Histidine	15971	C6H9N3O2	C6H9N3O2	0	True
C00137_[cyt]	C00137	cyt	myo-Inositol	17268	C6H12O6	C6H12O6	0	False
C00138_[cyt]	C00138	cyt	Reduced ferredoxin	17513	R	-	-	False
C00139_[cyt]	C00139	cyt	Oxidized ferredoxin	17908	R	-	-	False
C00141_[cyt]	C00141	cyt	3-Methyl-2-oxobutanoic acid	16530	C5H8O3	C5H7O3	-1	False
C00143_[cyt]	C00143	cyt	5,10-Methylenetetrahydrofolate	1989	C20H23N7O6	C20H21N7O6	-2	False
C00144_[cyt]	C00144	cyt	GMP	17345	C10H14N5O8P	C10H12N5O8P	-2	False
C00147_[cyt]	C00147	cyt	Adenine	16708	C5H5N5	C5H5N5	0	False
C00148_[cyt]	C00148	cyt	L-Proline	17203	C5H9NO2	C5H9NO2	0	False
C00149_[cyt]	C00149	cyt	(S)-Malate	30797	C4H6O5	C4H4O5	-2	False
C00152_[cyt]	C00152	cyt	L-Asparagine	17196	C4H8N2O3	C4H8N2O3	0	False
C00155_[cyt]	C00155	cyt	L-Homocysteine	17588	C4H9NO2S	C4H9NO2S	0	False
C00156_[cyt]	C00156	cyt	4-Hydroxybenzoate	30763	C7H6O3	C7H6O3	0	False
C00158_[cyt]	C00158	cyt	Citrate	30769	C6H8O7	C6H5O7	-3	False
C00160_[cyt]	C00160	cyt	Glycolate	17497	C2H4O3	C2H3O3	-1	False
C00166_[cyt]	C00166	cyt	Phenylpyruvate	30851	C9H8O3	C9H7O3	-1	False
C00168_[cyt]	C00168	cyt	Hydroxypyruvate	30841	C3H4O4	C3H3O4	-1	False
C00169_[cyt]	C00169	cyt	Carbamoyl phosphate	17672	CH4NO5P	CH2NO5P	-2	False
C00170_[cyt]	C00170	cyt	5'-Methylthioadenosine	17509	C11H15N5O3S	C11H15N5O3S	0	False
C00175_[cyt]	C00175	cyt	Cobalt ion	27638	Co	Co	0	False
C00175_[ext]	C00175	ext	Cobalt ion	27638	Co	Co	0	True
C00179_[cyt]	C00179	cyt	Agmatine	17431	C5H14N4	C5H16N4	2	False
C00182_[cyt]	C00182	cyt	Glycogen	28087	C6H10O5R	-	-	False
C00182N_[cyt]	C00182N	cyt	Glycogen granule	-	R	-	-	True
C00183_[cyt]	C00183	cyt	L-Valine	16414	C5H11NO2	C5H11NO2	0	False
C00188_[cyt]	C00188	cyt	L-Threonine	16857	C4H9NO3	C4H9NO3	0	False
C00194_[cyt]	C00194	cyt	Cobamide coenzyme	18408	C72H100CoN18O17P	C72CoH101N18O17P	0	False
C00197_[cax]	C00197	cax	3-Phospho-D-glycerate	17794	C3H7O7P	C3H4O7P	-3	False
C00197_[cyt]	C00197	cyt	3-Phospho-D-glycerate	17794	C3H7O7P	C3H4O7P	-3	False
C00199_[cyt]	C00199	cyt	D-Ribulose 5-phosphate	17363	C5H11O8P	C5H9O8P	-2	False
C00206_[cyt]	C00206	cyt	dADP	16174	C10H15N5O9P2	C10H13N5O9P2	-2	False
C00209_[cyt]	C00209	cyt	Oxalate	16995	C2H2O4	C2O4	-2	False
C00212_[cyt]	C00212	cyt	Adenosine	16335	C10H13N5O4	C10H13N5O4	0	False
C00217_[cyt]	C00217	cyt	D-Glutamate	15966	C5H9NO4	C5H8NO4	-1	False
C00224_[cyt]	C00224	cyt	Adenylyl sulfate	17709	C10H14N5O10PS	C10H12N5O10PS	-2	False
C00227_[cyt]	C00227	cyt	Acetyl phosphate	15350	C2H5O5P	C2H3O5P	-2	False
C00229_[cyt]	C00229	cyt	Acyl-carrier protein	18359	HSR	-	-	False
C00231_[cyt]	C00231	cyt	D-Xylulose 5-phosphate	16332	C5H11O8P	C5H9O8P	-2	False
C00232_[cyt]	C00232	cyt	Succinate semialdehyde	16265	C4H6O3	C4H5O3	-1	False
C00233_[cyt]	C00233	cyt	4-Methyl-2-oxopentanoate	48430	C6H10O3	C6H9O3	-1	False
C00234_[cyt]	C00234	cyt	10-Formyltetrahydrofolate	15637	C20H23N7O7	C20H21N7O7	-2	False
C00235_[cyt]	C00235	cyt	Dimethylallyl diphosphate	16057	C5H12O7P2	C5H10O7P2	-2	False
C00236_[cyt]	C00236	cyt	3-Phospho-D-glyceroyl phosphate	16001	C3H8O10P2	C3H4O10P2	-4	False
C00237_[cyt]	C00237	cyt	CO	17245	CO	CO	0	False
C00237_[ext]	C00237	ext	CO	17245	CO	CO	0	True
C00238_[cyt]	C00238	cyt	Potassium	29103	K	K	1	False
C00238_[ext]	C00238	ext	Potassium	29103	K	K	1	True
C00244_[cyt]	C00244	cyt	Nitrate	48107	NO3-	NO3	-1	False
C00244_[ext]	C00244	ext	Nitrate	48107	NO3-	NO3	-1	True
C00251_[cyt]	C00251	cyt	Chorismate	17333	C10H10O6	C10H8O6	-2	False
C00253_[cyt]	C00253	cyt	Nicotinate	15940	C6H5NO2	C6H4NO2	-1	False
C00254_[cyt]	C00254	cyt	Prephenate	16666	C10H10O6	C10H8O6	-2	False
C00255_[cyt]	C00255	cyt	Riboflavin	17015	C17H20N4O6	C17H19N4O6	-1	False
C00256_[cyt]	C00256	cyt	(R)-Lactate	42111	C3H6O3	C3H5O3	-1	False
C00258_[cyt]	C00258	cyt	D-Glycerate	32398	C3H6O4	C3H5O4	-1	False
C00263_[cyt]	C00263	cyt	L-Homoserine	15699	C4H9NO3	C4H9NO3	0	False
C00266_[cyt]	C00266	cyt	Glycolaldehyde	17071	C2H4O2	C2H4O2	0	False
C00269_PG_[cyt]	C00269_PG	cyt	CDP-diacylglycerol	17962	C14H19N3O15P2R2	C14H17N3O15P2R2	-2	False
C00275_[cyt]	C00275	cyt	D-Mannose 6-phosphate	17369	C6H13O9P	C6H11O9P	-2	False
C00279_[cyt]	C00279	cyt	D-Erythrose 4-phosphate	48153	C4H9O7P	C4H7O7P	-2	False
C00283_[cyt]	C00283	cyt	Hydrogen sulfide	16136	H2S	HS	-1	False
C00286_[cyt]	C00286	cyt	dGTP	16497	C10H16N5O13P3	C10H13N5O13P3	-3	False
C00288_[cax]	C00288	cax	HCO3-	17544	HCO3	CHO3	-1	False
C00288_[cyt]	C00288	cyt	HCO3-	17544	HCO3	CHO3	-1	False
C00288_[ext]	C00288	ext	HCO3-	17544	HCO3	CHO3	-1	True
C00291_[cyt]	C00291	cyt	Nickel	28112	Ni	Ni	0	False
C00291_[ext]	C00291	ext	Nickel	28112	Ni	Ni	0	True
C00295_[cyt]	C00295	cyt	Orotate	16742	C5H4N2O4	C5H3N2O4	-1	False
C00305_[cyt]	C00305	cyt	Magnesium	18420	Mg	Mg	2	False
C00305_[ext]	C00305	ext	Magnesium	18420	Mg	Mg	2	True
C00311_[cyt]	C00311	cyt	Isocitrate	30887	C6H8O7	C6H5O7	-3	False
C00315_[cyt]	C00315	cyt	Spermidine	16610	C7H19N3	C7H22N3	3	False
C00315_[ext]	C00315	ext	Spermidine	16610	C7H19N3	C7H22N3	3	True
C00327_[cyt]	C00327	cyt	L-Citrulline	16349	C6H13N3O3	C6H13N3O3	0	False
C00332_[cyt]	C00332	cyt	Acetoacetyl-CoA	15345	C25H40N7O18P3S	C25H36N7O18P3S	-4	False
C00334_[cyt]	C00334	cyt	4-Aminobutanoate	16865	C4H9NO2	C4H9NO2	0	False
C00337_[cyt]	C00337	cyt	(S)-Dihydroorotate	17025	C5H6N2O4	C5H5N2O4	-1	False
C00341_[cyt]	C00341	cyt	Geranyl diphosphate	17211	C10H20O7P2	C10H18O7P2	-2	False
C00342_[cyt]	C00342	cyt	Thioredoxin	15967	C10H14N4O4S2R4	-	-	False
C00343_[cyt]	C00343	cyt	Thioredoxin disulfide	18191	C10H12N4O4S2R4	-	-	False
C00344_PG_[cyt]	C00344_PG	cyt	Phosphatidylglycerol	17517	C8H13O10PR2	C8H12910PR2	-1	False
C00345_[cyt]	C00345	cyt	6-Phospho-D-gluconate	48928	C6H13O10P	C6H10O10P	-3	False
C00352_[cyt]	C00352	cyt	D-Glucosamine 6-phosphate	15873	C6H14NO8P	C6H13NO8P	-1	False
C00353_[cyt]	C00353	cyt	Geranylgeranyl diphosphate	48861	C20H36O7P2	C20H34O7P2	-2	False
C00354_[cyt]	C00354	cyt	D-Fructose 1,6-bisphosphate	16905	C6H14O12P2	C6H10O12P2	-4	False
C00360_[cyt]	C00360	cyt	dAMP	17713	C10H14N5O6P	C10H12N5O6P	-2	False
C00361_[cyt]	C00361	cyt	dGDP	28862	C10H15N5O10P2	C10H13N5O10P2	-2	False
C00363_[cyt]	C00363	cyt	dTDP	18075	C10H16N2O11P2	C10H14N2O11P2	-2	False
C00364_[cyt]	C00364	cyt	dTMP	17013	C10H15N2O8P	C10H13N2O8P	-2	False
C00365_[cyt]	C00365	cyt	dUMP	17622	C9H13N2O8P	C9H11N2O8P	-2	False
C00407_[cyt]	C00407	cyt	L-Isoleucine	17191	C6H13NO2	C6H13NO2	0	False
C00415_[cyt]	C00415	cyt	Dihydrofolate	15633	C19H21N7O6	C19H19N7O6	-2	False
C00416_DGDG_[cyt]	C00416	cyt	Phosphatidate_DGDG	16337	C5H7O8PR2	C5H5O8PR2	-2	False
C00416_MGDG_[cyt]	C00416	cyt	Phosphatidate_MGDG	16337	C5H7O8PR2	C5H5O8PR2	-2	False
C00416_PG_[cyt]	C00416	cyt	Phosphatidate_PG	16337	C5H7O8PR2	C5H5O8PR2	-2	False
C00416_SQDG_[cyt]	C00416	cyt	Phosphatidate_SQDG	16337	C5H7O8PR2	C5H5O8PR2	-2	False
C00417_[cyt]	C00417	cyt	cis-Aconitate	32805	C6H6O6	C6H3O6	-3	False
C00430_[cyt]	C00430	cyt	5-Aminolevulinate	17549	C5H9NO3	C5H9NO3	0	False
C00437_[cyt]	C00437	cyt	N-Acetylornithine	16543	C7H14N2O3	C7H14N2O3	0	False
C00438_[cyt]	C00438	cyt	N-Carbamoyl-L-aspartate	15859	C5H8N2O5	C5H6N2O5	-2	False
C00440_[cyt]	C00440	cyt	5-Methyltetrahydrofolate	15641	C20H25N7O6	C20H23N7O6	-2	False
C00441_[cyt]	C00441	cyt	L-Aspartate 4-semialdehyde	18051	C4H7NO3	C4H7NO3	0	False
C00445_[cyt]	C00445	cyt	5,10-Methenyltetrahydrofolate	15638	C20H22N7O6	C20H20N7O6	-1	False
C00447_[cyt]	C00447	cyt	Sedoheptulose 1,7-bisphosphate	17969	C7H16O13P2	C7H12O13P2	-4	False
C00448_[cyt]	C00448	cyt	trans,trans-Farnesyl diphosphate	17407	C15H28O7P2	C15H26O7P2	-2	False
C00458_[cyt]	C00458	cyt	dCTP	16311	C9H16N3O13P3	C9H13N3O13P3	-3	False
C00459_[cyt]	C00459	cyt	dTTP	18077	C10H17N2O14P3	C10H14N2O14P3	-3	False
C00460_[cyt]	C00460	cyt	dUTP	17625	C9H15N2O14P3	C9H12N2O14P3	-3	False
C00463_[cyt]	C00463	cyt	Indole	16881	C8H7N	C8H7N	0	False
C00469_[cyt]	C00469	cyt	Ethanol	16236	C2H6O	C2H6O	0	False
C00493_[cyt]	C00493	cyt	Shikimate	16119	C7H10O5	C7H9O5	-1	False
C00498_[cyt]	C00498	cyt	ADP-glucose	15751	C16H25N5O15P2	C16H23N5O15P2	-2	False
C00501_[cyt]	C00501	cyt	CDP-glucose	35242	C15H25N3O16P2	-2	-	False
C00522_[cyt]	C00522	cyt	(R)-Pantoate	14737	C6H12O4	C6H11O4	-1	False
C00536_[cyt]	C00536	cyt	Triphosphate	39949	P3H5O10	H2O10P3	-3	False
C00544_[cyt]	C00544	cyt	Homogentisate	44747	C8H8O4	C8H7O4	-1	False
C00546_[cyt]	C00546	cyt	Methylglyoxal	17158	C3H4O2	C3H4O2	0	False
C00559_[cyt]	C00559	cyt	Deoxyadenosine	17256	C10H13N5O3	C10H13N5O3	0	False
C00568_[cyt]	C00568	cyt	4-Aminobenzoate	30753	C7H7NO2	C7H6NO2	-1	False
C00577_[cyt]	C00577	cyt	D-Glyceraldehyde	17378	C3H6O3	C3H6O3	0	False
C00624_[cyt]	C00624	cyt	N-Acetyl-L-glutamate	17533	C7H11NO5	C7H9NO5	-2	False
C00627_[cyt]	C00627	cyt	Pyridoxine phosphate	28803	C8H12NO6P	C8H10NO6P	-2	False
C00631_[cyt]	C00631	cyt	2-Phospho-D-glycerate	17835	C3H7O7P	C3H4O7P	-3	False
C00636_[cyt]	C00636	cyt	D-Mannose 1-phosphate	35374	C6H13O9P	C6H11O9P	-2	False
C00641_DGDG_[cyt]	C00641	cyt	1,2-Diacyl-sn-glycerol_DGDG	17815	C5H6O5R2	C5H6O5R2	0	False
C00641_MGDG_[cyt]	C00641	cyt	1,2-Diacyl-sn-glycerol_MGDG	17815	C5H6O5R2	C5H6O5R2	0	False
C00641_SQDG_[cyt]	C00641	cyt	1,2-Diacyl-sn-glycerol_SQDG	17815	C5H6O5R2	C5H6O5R2	0	False
C00655_[cyt]	C00655	cyt	Xanthosine 5'-phosphate	15652	C10H13N4O9P	C10H11N4O9P	-2	False
C00666_[cyt]	C00666	cyt	LL-2,6-Diaminoheptanedioate	16026	C7H14N2O4	C7H14N2O4	0	False
C00669_[cyt]	C00669	cyt	gamma-L-Glutamyl-L-cysteine	17515	C8H14N2O5S	C8H13N2O5S	-1	False
C00671_[cyt]	C00671	cyt	(S)-3-Methyl-2-oxopentanoic acid	15614	C6H10O3	C6H9O3	-1	False
C00680_[cyt]	C00680	cyt	meso-2,6-Diaminoheptanedioate	16488	C7H14N2O4	C7H14N2O4	0	False
C00688_[cyt]	C00688	cyt	dTDP-4-dehydro-6-deoxy-L-mannose	15744	C16H24N2O15P2	C16H22N2O15P2	-2	False
C00692_[cyt]	C00692	cyt	UDP-N-acetylmuramoyl-L-alanyl-D-glutamate	16970	C28H43N5O23P2	C28H39N5O23P2	-4	False
C00704_[cyt]	C00704	cyt	O2-	18421	O2	O2	-1	False
C00705_[cyt]	C00705	cyt	dCDP	28846	C9H15N3O10P2	C9H13N3O10P2	-2	False
C00718_[cyt]	C00718	cyt	Amylose	28102	C6H10O5	C6H10O5	0	False
C00750_[cyt]	C00750	cyt	Spermine	15746	C10H26N4	C10H30N4	4	False
C00842_[cyt]	C00842	cyt	dTDP-glucose	15700	C16H26N2O16P2	C16H24N2O16P2	-2	False
C00856_[cyt]	C00856	cyt	DNA cytosine	16991	C9H14N3O7PR	-	-	True
C00857_[cyt]	C00857	cyt	Deamino-NAD+	18304	C21H27N6O15P2	C21H24N6O15P2	-2	False
C00860_[cyt]	C00860	cyt	L-Histidinol	16255	C6H11N3O	C6H12N3O	1	False
C00864_[cyt]	C00864	cyt	Pantothenate	46905	C9H17NO5	C9H16NO5	-1	False
C00882_[cyt]	C00882	cyt	Dephospho-CoA	15468	C21H35N7O13P2S	C21H33N7O13P2S	-2	False
C00885_[cyt]	C00885	cyt	Isochorismate	17582	C10H10O6	C10H8O6	-2	False
C00900_[cyt]	C00900	cyt	2-Acetolactate	16444	C5H8O4	C5H7O4	-1	False
C00921_[cyt]	C00921	cyt	Dihydropteroate	4581	C14H14N6O3	C14H13N6O3	-1	False
C00931_[cyt]	C00931	cyt	Porphobilinogen	17381	C10H14N2O4	C10H13N2O4	-1	False
C00944_[cyt]	C00944	cyt	3-Dehydroquinate	17947	C7H10O6	C7H9O6	-1	False
C00966_[cyt]	C00966	cyt	2-Dehydropantoate	17094	C6H10O4	C6H9O4	-1	False
C00979_[cyt]	C00979	cyt	O-Acetyl-L-serine	17981	C5H9NO4	C5H9NO4	0	False
C00988_[cax]	C00988	cax	2-Phosphoglycolate	17150	C2H5O6P	C2H2O6P	-3	False
C00988_[cyt]	C00988	cyt	2-Phosphoglycolate	17150	C2H5O6P	C2H2O6P	-3	False
C00993_[cyt]	C00993	cyt	D-Alanyl-D-alanine	16576	C6H12N2O3	C6H12N2O3	0	False
C00995_[cyt]	C00995	cyt	Ferricytochrome b1	16748	R	-	-	True
C00998_[cyt]	C00998	cyt	Ferrocytochrome b1	16762	R	-	-	True
C01005_[cyt]	C01005	cyt	O-Phospho-L-serine	15811	C3H8NO6P	C3H8NO6P	-	False
C01024_[cyt]	C01024	cyt	Hydroxymethylbilane	16645	C40H46N4O17	C40H38N4O17	-8	False
C01035_[cyt]	C01035	cyt	4-Guanidinobutanoate	15728	C5H11N3O2	C5H11N3O2	0	False
C01050_[cyt]	C01050	cyt	UDP-N-acetylmuramate	17882	C20H31N3O19P2	C20H28N3O19P2	-3	False
C01051_[cyt]	C01051	cyt	Uroporphyrinogen III	15437	C40H44N4O16	C40H36N4O16	-8	False
C01077_[cyt]	C01077	cyt	O-Acetyl-L-homoserine	16288	C6H11NO4	C6H11NO4	0	False
C01079_[cyt]	C01079	cyt	Protoporphyrinogen IX	15435	C34H40N4O4	C34H38N4O4	-2	False
C01081_[cyt]	C01081	cyt	Thiamin monophosphate	9533	C12H18N4O4PS	C12H16N4O4PS	-1	False
C01100_[cyt]	C01100	cyt	L-Histidinol phosphate	16996	C6H12N3O4P	C6H11N3O4P	-1	False
C01102_[cyt]	C01102	cyt	O-Phospho-L-homoserine	15961	C4H10NO6P	C4H8NO6P	-2	False
C01103_[cyt]	C01103	cyt	Orotidine 5'-phosphate	15842	C10H13N2O11P	C10H10N2O11P	-3	False
C01134_[cyt]	C01134	cyt	Pantetheine 4'-phosphate	16858	C11H23N2O7PS	C11H21N2O7PS	-2	False
C01137_[cyt]	C01137	cyt	S-Adenosylmethioninamine	15625	C14H23N6O3S	C14H24N6O3S	2	False
C01146_[cyt]	C01146	cyt	2-Hydroxy-3-oxopropanoate	16992	C3H4O4	C3H3O4	-1	False
C01157_[cyt]	C01157	cyt	trans-4-Hydroxy-L-proline	18095	C5H9NO3	C5H9NO3	0	False
C01165_[cyt]	C01165	cyt	L-Glutamate 5-semialdehyde	17232	C5H9NO3	C5H9NO3	0	False
C01179_[cyt]	C01179	cyt	3-(4-Hydroxyphenyl)pyruvate	15999	C9H8O4	C9H7O4	-1	False
C01182_[cax]	C01182	cax	D-Ribulose 1,5-bisphosphate	16710	C5H12O11P2	C5H8O11P2	-4	False
C01182_[cyt]	C01182	cyt	D-Ribulose 1,5-bisphosphate	16710	C5H12O11P2	C5H8O11P2	-4	False
C01185_[cyt]	C01185	cyt	Nicotinate D-ribonucleotide	15763	C11H15NO9P	C11H12NO9P	-2	False
C01203_[cyt]	C01203	cyt	Oleoyl-[acyl-carrier protein]	-	C18H33OSR	-	-	False
C01209_[cyt]	C01209	cyt	Malonyl-[acyl-carrier protein]	17330	C3H3O3SR	C3H2O3RS	-1	False
C01212_[cyt]	C01212	cyt	UDP-N-acetylmuramoyl-L-alanine	16932	C23H36N4O20P2	C23H33N4O20P2	-3	False
C01236_[cyt]	C01236	cyt	D-Glucono-1,5-lactone 6-phosphate	16938	C6H11O9P	C6H9O9P	-2	False
C01250_[cyt]	C01250	cyt	N-Acetyl-L-glutamate 5-semialdehyde	16319	C7H11NO4	C7H10NO4	-1	False
C01267_[cyt]	C01267	cyt	3-(Imidazol-4-yl)-2-oxopropyl phosphate	16426	C6H9N2O5P	C6H7N2O5P	-2	False
C01268_[cyt]	C01268	cyt	5-Amino-6-(5'-phosphoribosylamino)uracil	18337	C9H15N4O9P	C9H13N4O9P	-2	False
C01269_[cyt]	C01269	cyt	5-O-(1-Carboxyvinyl)-3-phosphoshikimate	16257	C10H13O10P	C10H9O10P	-4	False
C01300_[cyt]	C01300	cyt	2-Amino-4-hydroxy-6-hydroxymethyl-7,8-dihydropteridine	17083	C7H9N5O2	C7H9N5O2	0	False
C01302_[cyt]	C01302	cyt	1-(2-Carboxyphenylamino)-1-deoxy-D-ribulose 5-phosphate	29112	C12H16NO9P	C12H13NO9P	-3	False
C01304_[cyt]	C01304	cyt	2,5-Diamino-6-(5'-phosphoribosylamino)-4-pyrimidineone	29114	C9H16N5O8P	C9H14N5O8P	-2	False
C01330_[cyt]	C01330	cyt	Sodium	29101	Na	Na	1	False
C01330_[ext]	C01330	ext	Sodium	29101	Na	Na	1	True
C01342_[cyt]	C01342	cyt	NH4+	28938	NH4	H4N	1	False
C01342_[ext]	C01342	ext	NH4+	28938	NH4	H4N	1	True
C01346_[cyt]	C01346	cyt	dUDP	28850	C9H14N2O11P2	C9H12N2O11P2	-2	False
C01353_[cax]	C01353	cax	Carbonic acid	28976	H2CO3	CHO3	-1	False
C01419_[cyt]	C01419	cyt	Cys-Gly	4047	C5H10N2O3S	C5H10N2O3S	0	False
C01468_[cyt]	C01468	cyt	4-Cresol	17847	C7H8O	C7H8O	0	False
C01468_[ext]	C01468	ext	4-Cresol	17847	C7H8O	C7H8O	0	True
C01641_[cyt]	C01641	cyt	tRNA(Glu)	29175	C15H21N5O10PR	-	-	False
C01672_[cyt]	C01672	cyt	Cadaverine	18127	C5H14N2	C5H16N2	2	False
C01847_[cyt]	C01847	cyt	Reduced FMN	16048	C17H23N4O9P	C17H21N4O9P	-2	False
C01929_[cyt]	C01929	cyt	L-Histidinal	-	C6H9N3O	-	-	False
C02059_[cyt]	C02059	cyt	Phylloquinone	18067	C31H46O2	C31H46O2	0	False
C02094_[cyt]	C02094	cyt	beta-Carotene	17579	C40H56	C40H56	0	False
C02097_[cyt]	C02097	cyt	dTDP-galactose	14086	C16H26N2O16P2	C16H24N2O16P2	-2	False
C02139_[cyt]	C02139	cyt	Chlorophyllide	16900	C35H34MgN4O5	C35H32MgN4O5	-2	False
C02191_[cyt]	C02191	cyt	Protoporphyrin	15430	C34H34N4O4	C34H32N4O4	-2	False
C02226_[cyt]	C02226	cyt	2-Methylmaleate	17626	C5H6O4	C5H4O4	-2	False
C02463_[cyt]	C02463	cyt	Precorrin 2	50602	C42H48N4O16	C42H41N4O16	-7	False
C02477_[cyt]	C02477	cyt	alpha-Tocopherol	18145	C29H50O2	C29H50O2	0	False
C02483_[cyt]	C02483	cyt	gamma-Tocopherol	18185	C28H48O2	C28H48O2	0	False
C02504_[cyt]	C02504	cyt	(2S)-2-Isopropylmalate	35128	C7H12O5	C7H10O5	-2	False
C02591_[cyt]	C02591	cyt	Sucrose 6-phosphate	16308	C12H23O14P	C12H21O14P	-2	False
C02612_[cyt]	C02612	cyt	(R)-2-Methylmalate	15586	C5H8O5	C5H6O5	-2	False
C02631_[cyt]	C02631	cyt	2-Isopropylmaleate	17275	C7H10O4	C7H8O4	-2	False
C02637_[cyt]	C02637	cyt	3-Dehydroshikimate	30918	C7H8O5	C7H7O5	-1	False
C02730_[cyt]	C02730	cyt	2-Succinylbenzoate	18325	C11H10O5	C11H8O5	-2	False
C02739_[cyt]	C02739	cyt	1-(5-Phospho-D-ribosyl)-ATP	18263	C15H25N5O20P4	C15H20N5O20P4	-5	False
C02741_[cyt]	C02741	cyt	Phosphoribosyl-AMP	18374	C15H23N5O14P2	C15H19N5O14P2	-4	False
C02880_[cyt]	C02880	cyt	Protochlorophyllide	16673	C35H32MgN4O5	C35H30MgN4O5	-2	False
C02967_[cyt]	C02967	cyt	DNA 5-methylcytosine	-	C10H16N3O7PR	-	-	True
C02987_[cyt]	C02987	cyt	L-Glutamyl-tRNA(Glu)	29157	C20H28N6O13PR	-	-	False
C03025_[pps]	C03025	pps	Reduced plastocyanin	-	R	-	-	False
C03025_[tll]	C03025	tll	Reduced plastocyanin	-	R	-	-	False
C03082_[cyt]	C03082	cyt	4-Phospho-L-aspartate	15836	C4H8NO7P	C4H6NO7P	-2	False
C03090_[cyt]	C03090	cyt	5-Phosphoribosylamine	37737	C5H12NO7P	C5H11NO7P	-1	False
C03114_[cyt]	C03114	cyt	Dimethylbenzimidazole	15890	C9H10N2	C9H10N2	0	False
C03160_[cyt]	C03160	cyt	2-Succinylbenzoyl-CoA	15509	C32H44N7O20P3S	C32H39N7O20P3S	-5	False
C03162_[pps]	C03162	pps	Oxidized plastocyanin	-	R	-	-	False
C03162_[tll]	C03162	tll	Oxidized plastocyanin	-	R	-	-	False
C03175_[cyt]	C03175	cyt	Shikimate 3-phosphate	17052	C7H11O8P	C7H8O8P	-3	False
C03232_[cyt]	C03232	cyt	3-Phosphonooxypyruvate	30933	C3H5O7P	C3H5O7P	0	False
C03263_[cyt]	C03263	cyt	Coproporphyrinogen III	15439	C36H44N4O8	C36H40N4O8	-4	False
C03287_[cyt]	C03287	cyt	L-Glutamyl 5-phosphate	17798	C5H10NO7P	C5H8NO7P	-2	False
C03319_[cyt]	C03319	cyt	dTDP-6-deoxy-L-mannose	15774	C16H26N2O15P2	C16H24N2O15P2	-2	False
C03340_[cyt]	C03340	cyt	L-2,3-Dihydrodipicolinate	18042	C7H7NO4	C7H5NO4	-2	False
C03373_[cyt]	C03373	cyt	Aminoimidazole ribotide	28843	C8H14N3O7P	C8H13N3O7P	-1	False
C03393_[cyt]	C03393	cyt	4-Phospho-D-erythronate	49003	C4H9O8P	C4H6O8P	-3	False
C03406_[cyt]	C03406	cyt	N-(L-Arginino)succinate	15682	C10H18N4O6	C10H17N4O6	-1	False
C03427_[cyt]	C03427	cyt	Prephytoene diphosphate	17090	C40H68O7P2	C40H66O7P2	-2	False
C03451_[cyt]	C03451	cyt	(R)-S-Lactoylglutathione	15694	C13H21N3O8S	C13H20N3O8S	-1	False
C03492_[cyt]	C03492	cyt	D-4'-Phosphopantothenate	15905	C9H18NO8P	C9H15NO8P	-3	False
C03506_[cyt]	C03506	cyt	Indoleglycerol phosphate	18299	C11H14NO6P	C11H12NO6P	-2	False
C03516_[cyt]	C03516	cyt	Magnesium protoporphyrin	15431	C34H32MgN4O4	C34H30MgN4O4	-2	False
C03561_[cyt]	C03561	cyt	(R)-3-Hydroxybutanoyl-CoA	15452	C25H42N7O18P3S	C25H38N7O18P3S	-4	False
C03657_[cyt]	C03657	cyt	1,4-Dihydroxy-2-naphthoate	18094	C11H8O4	C11H7O4	-1	False
C03692_DGDG_[cyt]	C03692	cyt	1,2-Diacyl-3-beta-D-galactosyl-sn-glycerol_DGDG	17615	C11H16O10R2	C11H16O10R2	-	False
C03692_MGDG_[cyt]	C03692	cyt	1,2-Diacyl-3-beta-D-galactosyl-sn-glycerol_MGDG	17615	C11H16O10R2	C11H16O10R2	-	False
C03722_[cyt]	C03722	cyt	Pyridine-2,3-dicarboxylate	16675	C7H5NO4	C7H3NO4	-2	False
C03741_[cyt]	C03741	cyt	(S)-4-Amino-5-oxopentanoate	15757	C5H9NO3	C5H9NO3	0	False
C03771_[cyt]	C03771	cyt	5-Guanidino-2-oxopentanoate	28116	C6H11N3O3	C6H11N3O3	0	False
C03794_[cyt]	C03794	cyt	N6-(1,2-Dicarboxyethyl)-AMP	15919	C14H18N5O11P	C14H14N5O11P	-4	False
C03838_[cyt]	C03838	cyt	5'-Phosphoribosylglycinamide	18349	C7H15N2O8P	C7H14N2O8P	-1	False
C03885_[cyt]	C03885	cyt	3-Nonaprenyl-4-hydroxybenzoate	18162	C52H78O3	C52H76O3	-2	False
C03892_PG_[cyt]	C03892	cyt	Phosphatidylglycerophosphate	37393	C8H14O13P2R2	C8H11O13P2R2	-3	False
C03912_[cyt]	C03912	cyt	(S)-1-Pyrroline-5-carboxylate	371	C5H7NO2	C5H6NO2	-1	False
C03939_[cyt]	C03939	cyt	Acetyl-[acyl-carrier protein]	17093	C2H3OSR	C2H3ORS	0	False
C03972_[cyt]	C03972	cyt	2,3,4,5-Tetrahydrodipicolinate	864	C7H9NO4	C7H7NO4	-2	False
C04006_[cyt]	C04006	cyt	1D-myo-Inositol 3-phosphate	18169	C6H13O9P	-	-	False
C04039_[cyt]	C04039	cyt	2,3-Dihydroxy-3-methylbutanoate	15689	C5H10O4	C5H9O4	-1	False
C04046_DGDG_[cyt]	C04046	cyt	3-D-Glucosyl-1,2-diacylglycerol_DGDG	-	C11H16O10R2	-	-	False
C04046_MGDG_[cyt]	C04046	cyt	3-D-Glucosyl-1,2-diacylglycerol_MGDG	-	C11H16O10R2	-	-	False
C04088_[cyt]	C04088	cyt	Octadecanoyl-[acyl-carrier protein]	-	C18H35OSR	-	-	False
C04122_[cyt]	C04122	cyt	D-1-Aminopropan-2-ol O-phosphate	28390	C3H10NO4P	C3H9NO4P	-1	False
C04133_[cyt]	C04133	cyt	N-Acetyl-L-glutamate 5-phosphate	16878	C7H12NO8P	C7H9NO8P	-3	False
C04145_[cyt]	C04145	cyt	all-trans-Nonaprenyl diphosphate	18144	C45H76O7P2	C45H74O7P2	-2	False
C04188_[cyt]	C04188	cyt	S-Methyl-5-thio-D-ribose 1-phosphate	27859	C6H13O7PS	C6H11O7PS	-2	False
C04236_[cyt]	C04236	cyt	(2S)-2-Isopropyl-3-oxosuccinate	1467	C7H10O5	C7H8O5	-2	False
C04246_[cyt]	C04246	cyt	But-2-enoyl-[acyl-carrier protein]	-	C4H5OSR	-	-	False
C04281_[cyt]	C04281	cyt	L-1-Pyrroline-3-hydroxy-5-carboxylate	6151	C5H7NO3	C5H6NO3	-1	False
C04302_[cyt]	C04302	cyt	N-(5-Phospho-D-ribosyl)anthranilate	7091	C12H16NO9P	C12H13NO9P	-3	False
C04327_[cyt]	C04327	cyt	4-Methyl-5-(2-phosphoethyl)-thiazole	17857	C6H10NO4PS	C6H8NO4PS	-2	False
C04332_[cyt]	C04332	cyt	6,7-Dimethyl-8-(1-D-ribityl)lumazine	17601	C13H18N4O6	C13H17N4O6	-1	False
C04352_[cyt]	C04352	cyt	(R)-4'-Phosphopantothenoyl-L-cysteine	15769	C12H23N2O9PS	C12H20N2O9PS	-3	False
C04376_[cyt]	C04376	cyt	5'-Phosphoribosyl-N-formylglycinamide	18272	C8H15N2O9P	C8H13N2O9P	-2	False
C04411_[cyt]	C04411	cyt	(2R,3S)-3-Isopropylmalate	35121	C7H12O5	C7H10O5	-2	False
C04454_[cyt]	C04454	cyt	5-Amino-6-(5'-phosphoribitylamino)uracil	18247	C9H17N4O9P	C9H15N4O9P	-2	False
C04501_[cyt]	C04501	cyt	N-Acetyl-alpha-D-glucosamine 1-phosphate	16446	C8H16NO9P	C8H14NO9P	-2	False
C04536_[cyt]	C04536	cyt	Magnesium protoporphyrin monomethyl ester	15432	C35H34MgN4O4	C35H34MgN4O4	0	False
C04556_[cyt]	C04556	cyt	4-Amino-2-methyl-5-phosphomethylpyrimidine	18032	C6H10N3O4P	C6H8N3O4P	-2	False
C04574_[cyt]	C04574	cyt	di-trans,poly-cis-Undecaprenyl diphosphate	18197	C55H92O7P2	C55H90O7P2	-2	False
C04582_[cyt]	C04582	cyt	S-Methyl-5-thio-D-ribulose 1-phosphate	28096	C6H13O7PS	C6H11O7PS	-2	False
C04582_[ext]	C04582	ext	S-Methyl-5-thio-D-ribulose 1-phosphate	28096	C6H13O7PS	C6H11O7PS	-2	True
C04618_[cyt]	C04618	cyt	(3R)-3-Hydroxybutanoyl-[acyl-carrier protein]	-	C4H7O2SR	-	-	False
C04619_[cyt]	C04619	cyt	(3R)-3-Hydroxydecanoyl-[acyl-carrier protein]	-	C10H19O2SR	-	-	False
C04620_[cyt]	C04620	cyt	(3R)-3-Hydroxyoctanoyl-[acyl-carrier protein]	-	C8H15O2SR	-	-	False
C04631_[cyt]	C04631	cyt	UDP-N-acetyl-3-(1-carboxyvinyl)-D-glucosamine	16435	C20H29N3O19P2	C20H26N3O19P2	-3	False
C04633_[cyt]	C04633	cyt	(3R)-3-Hydroxypalmitoyl-[acyl-carrier protein]	-	C16H31O2SR	-	-	False
C04640_[cyt]	C04640	cyt	2-(Formamido)-N1-(5'-phosphoribosyl)acetamidine	18413	C8H16N3O8P	C8H15N3O8P	-1	False
C04652_[cyt]	C04652	cyt	UDP-2,3-bis(3-hydroxytetradecanoyl)glucosamine	17787	C43H77N3O20P2	C43H75N3O20P2	-2	False
C04666_[cyt]	C04666	cyt	D-erythro-1-(Imidazol-4-yl)glycerol 3-phosphate	17805	C6H11N2O6P	C6H9N2O6P	-2	False
C04677_[cyt]	C04677	cyt	1-(5'-Phosphoribosyl)-5-amino-4-imidazolecarboxamide	18406	C9H15N4O8P	C9H13N4O8P	-2	False
C04688_[cyt]	C04688	cyt	(3R)-3-Hydroxytetradecanoyl-[acyl-carrier protein]	-	C14H27O2SR	-	-	False
C04691_[cyt]	C04691	cyt	2-Dehydro-3-deoxy-D-arabino-heptonate 7-phosphate	18150	C7H13O10P	C7H10O10P	-3	False
C04732_[cyt]	C04732	cyt	5-Amino-6-(1-D-ribitylamino)uracil	15934	C9H16N4O6	C9H16N4O6	0	False
C04734_[cyt]	C04734	cyt	1-(5'-Phosphoribosyl)-5-formamido-4-imidazolecarboxamide	18381	C10H15N4O9P	C10H13N4O9P	-2	False
C04738_[cyt]	C04738	cyt	UDP-3-O-(3-hydroxytetradecanoyl)-N-acetylglucosamine	28131	C31H53N3O19P2	C31H51N3O19P2	-2	False
C04751_[cyt]	C04751	cyt	1-(5-Phospho-D-ribosyl)-5-amino-4-imidazolecarboxylate	28413	C9H14N3O9P	C9H12N3O9P	-2	False
C04752_[cyt]	C04752	cyt	2-Methyl-4-amino-5-hydroxymethylpyrimidine diphosphate	16629	C6H11N3O7P2	C6H9N3O7P2	-2	False
C04778_[cyt]	C04778	cyt	N1-(5-Phospho-alpha-D-ribosyl)-5,6-dimethylbenzimidazole	16837	C14H19N2O7P	C14H17N2O7P	-2	False
C04807_[cyt]	C04807	cyt	2-Amino-7,8-dihydro-4-hydroxy-6-(diphosphooxymethyl)pteridine	15998	C7H11N5O8P2	C7H9N5O8P2	-2	False
C04823_[cyt]	C04823	cyt	1-(5'-Phosphoribosyl)-5-amino-4-(N-succinocarboxamide)-imidazole	18319	C13H19N4O12P	C13H15N4O12P	-4	False
C04824_[cyt]	C04824	cyt	2,3-Bis(3-hydroxytetradecanoyl)-beta-D-glucosaminyl 1-phosphate	16942	C34H66NO12P	C34H64NO12P	-2	False
C04874_[cyt]	C04874	cyt	2-Amino-4-hydroxy-6-(D-erythro-1,2,3-trihydroxypropyl)-7,8-	17001	C9H13N5O4	C9H13N5O4	0	False
C04877_[cyt]	C04877	cyt	UDP-N-acetylmuramoyl-L-alanyl-D-gamma-glutamyl-meso-2,6-diaminopimelate	28639	C35H55N7O26P2	C35H51N7O26P2	-4	False
C04882_[cyt]	C04882	cyt	UDP-N-acetylmuramoyl-L-alanyl-D-glutamyl-6-carboxy-L-lysyl-D-alanyl-D-alanine	18199	C41H65N9O28P2	C41H61N9O28P2	-4	False
C04895_[cyt]	C04895	cyt	2-Amino-4-hydroxy-6-(erythro-1,2,3-trihydroxypropyl)dihydropteridinetriphosphate	18372	C9H16N5O13P3	C9H13N5O13P3	-3	False
C04896_[cyt]	C04896	cyt	5-(5-Phospho-D-ribosylaminoformimino)-1-(5-phosphoribosyl)-imidazole-4-carboxamide	18302	C15H25N5O15P2	C15H21N5O15P2	-4	False
C04916_[cyt]	C04916	cyt	N-(5'-Phospho-D-1'-ribulosylformimino)-5-amino-1-(5''-phospho-D-ribosyl)-4-imidazolecarboxamide	27735	C15H25N5O15P2	C15H21N5O15P2	-4	False
C04932_[cyt]	C04932	cyt	2,3,2',3'-Tetrakis(3-hydroxytetradecanoyl)-D-glucosaminyl-1,6-beta-	18380	C68H129N2O20P	C68H127N2O20P	-2	False
C05125_[cyt]	C05125	cyt	2-(alpha-Hydroxyethyl)thiamine diphosphate	978	C14H23N4O8P2S	C14H21N4O8P2S	-1	False
C05198_[cyt]	C05198	cyt	5'-Deoxyadenosine	17319	C10H13N5O3	C10H13N5O3	0	False
C05223_[cyt]	C05223	cyt	Dodecanoyl-[acyl-carrier protein]	16759	C12H23OSR	C12H23ORS	0	False
C05306_[cyt]	C05306	cyt	Chlorophyll a	18230	C55H72MgN4O5	C55H71MgN4O5	-1	False
C05382_[cyt]	C05382	cyt	Sedoheptulose 7-phosphate	15721	C7H15O10P	C7H13O10P	-2	False
C05413_[cyt]	C05413	cyt	Phytoene	8191	C40H64	C40H64	0	False
C05414_[cyt]	C05414	cyt	Phytofluene	28129	C40H62	C40H62	0	False
C05427_[cyt]	C05427	cyt	Phytyl diphosphate	18187	C20H42O7P2	C20H40O7P2	-2	False
C05430_[cyt]	C05430	cyt	zeta-Carotene	28068	C40H60	C40H60	0	False
C05431_[cyt]	C05431	cyt	Neurosporene	16833	C40H58	C40H58	0	False
C05432_[cyt]	C05432	cyt	Lycopene	15948	C40H56	C40H56	0	False
C05435_[cyt]	C05435	cyt	gamma-Carotene	27740	C40H56	C40H56	0	False
C05744_[cyt]	C05744	cyt	Acetoacetyl-[acp]	2393	C4H5O2SR	C4H5O2RS	0	False
C05745_[cyt]	C05745	cyt	Butyryl-[acp]	-	C4H7OSR	-	-	False
C05746_[cyt]	C05746	cyt	3-Oxohexanoyl-[acp]	-	C6H9O2SR	-	-	False
C05747_[cyt]	C05747	cyt	(R)-3-Hydroxyhexanoyl-[acp]	-	C6H11O2SR	-	-	False
C05748_[cyt]	C05748	cyt	trans-Hex-2-enoyl-[acp]	-	C6H9OSR	-	-	False
C05749_[cyt]	C05749	cyt	Hexanoyl-[acp]	-	C6H11OSR	-	-	False
C05750_[cyt]	C05750	cyt	3-Oxooctanoyl-[acp]	-	C8H13O2SR	-	-	False
C05751_[cyt]	C05751	cyt	trans-Oct-2-enoyl-[acp]	-	C8H13OSR	-	-	False
C05752_[cyt]	C05752	cyt	Octanoyl-[acp]	7725	C8H15OSR	C8H15ORS	0	False
C05753_[cyt]	C05753	cyt	3-Oxodecanoyl-[acp]	-	C10H17O2SR	-	-	False
C05754_[cyt]	C05754	cyt	trans-Dec-2-enoyl-[acp]	-	C10H17OSR	-	-	False
C05755_[cyt]	C05755	cyt	Decanoyl-[acp]	4349	C10H19OSR	C10H19ORS	0	False
C05756_[cyt]	C05756	cyt	3-Oxododecanoyl-[acp]	-	C12H21O2SR	-	-	False
C05757_[cyt]	C05757	cyt	(R)-3-Hydroxydodecanoyl-[acp]	-	C12H23O2SR	-	-	False
C05758_[cyt]	C05758	cyt	trans-Dodec-2-enoyl-[acp]	-	C12H21OSR	-	-	False
C05759_[cyt]	C05759	cyt	3-Oxotetradecanoyl-[acp]	-	C14H25O2SR	-	-	False
C05760_[cyt]	C05760	cyt	trans-Tetradec-2-enoyl-[acp]	-	C14H25OSR	-	-	False
C05761_[cyt]	C05761	cyt	Tetradecanoyl-[acp]	50651	C14H27OSR	C14H27ORS	0	False
C05762_[cyt]	C05762	cyt	3-Oxohexadecanoyl-[acp]	1639	C16H29O2SR	C16H29O2RS	0	False
C05763_[cyt]	C05763	cyt	trans-Hexadec-2-enoyl-[acp]	-	C16H29OSR	-	-	False
C05764_[cyt]	C05764	cyt	(9Z)-Hexadecanoyl-[acp]	5697	C16H31OSR	C16H31ORS	0	False
C05772_[cyt]	C05772	cyt	Precorrin 3A	28307	C43H50N4O16	C43H43N4O16	-7	False
C05775_[cyt]	C05775	cyt	alpha-Ribazole	10329	C14H18N2O4	C14H18N2O4	0	False
C05817_[cyt]	C05817	cyt	(1R,6R)-6-Hydroxy-2-succinylcyclohexa-2,4-diene-1-carboxylate	39564	C11H12O6	C11H10O6	-2	False
C05840_[cyt]	C05840	cyt	Iminoaspartate	50616	C4H5NO4	C4H3NO4	-2	False
C05897_[cyt]	C05897	cyt	Undecaprenyl-diphospho-N-acetylmuramoyl-L-alanyl-D-glutamyl-meso-2,6-diaminopimeloyl-D-alanyl-D-alanine	-	C87H143N7O23P2	-	-	False
C05898_[cyt]	C05898	cyt	Undecaprenyl-diphospho-N-acetylmuramoyl-(N-acetylglucosamine)-L-alanyl-D-glutamyl-meso-2,6-diaminopimeloyl-D-alanyl-D-alanine	28138	C95H156N8O28P2	C95H152N8O28P2	-4	False
C05925_[cyt]	C05925	cyt	Dihydroneopterin phosphate	48954	C9H14N5O7P	C9H12N5O7P	-2	False
C05946_[cyt]	C05946	cyt	D-4-Hydroxy-2-oxoglutarate	4083	C5H6O6	C5H4O6	-2	False
C05947_[cyt]	C05947	cyt	L-erythro-4-Hydroxyglutamate	6331	C5H9NO5	C5H8NO5	-1	False
C06006_[cyt]	C06006	cyt	(S)-2-Aceto-2-hydroxybutanoate	27681	C6H10O4	C6H9O4	-1	False
C06007_[cyt]	C06007	cyt	(R)-2,3-Dihydroxy-3-methylpentanoate	27512	C6H12O4	C6H11O4	-1	False
C06022_[cyt]	C06022	cyt	UDP-3-O-(3-hydroxytetradecanoyl)-D-glucosamine	27392	C29H51N3O18P2	C29H49N3O18P2	-2	False
C06032_[cyt]	C06032	cyt	D-erythro-3-Methylmalate	27394	C5H8O5	C5H6O5	-2	False
C06037_DGDG_[cyt]	C06037	cyt	Digalactosyl-diacylglycerol_DGDG	28396	C17H26O15R2	C17H26O15R2	0	False
C06054_[cyt]	C06054	cyt	2-Oxo-3-hydroxy-4-phosphobutanoate	27951	C4H7O8P	C4H4O8P	-3	False
C06055_[cyt]	C06055	cyt	O-Phospho-4-hydroxy-L-threonine	18336	C4H10NO7P	C4H8NO7P	-2	False
C06098_[cyt]	C06098	cyt	Zeaxanthin	27547	C40H56O2	C40H56O2	0	False
C06143_[cyt]	C06143	cyt	Poly-beta-hydroxybutyrate	-	C4H6O2R	-	-	False
C06156_[cyt]	C06156	cyt	alpha-D-Glucosamine 1-phosphate	27625	C6H14NO8P	C6H12NO8P	-2	False
C06232_[cyt]	C06232	cyt	Molybdate	36264	MoH2O4	H2MoO4	0	False
C06232_[ext]	C06232	ext	Molybdate	36264	MoH2O4	H2MoO4	0	True
C06319_[cyt]	C06319	cyt	Precorrin 6Y	27858	C44H56N4O16	C44H50N4O16	-6	False
C06320_[cyt]	C06320	cyt	Precorrin 6X	27513	C44H54N4O16	C44H47N4O16	-7	False
C06399_[cyt]	C06399	cyt	Hydrogenobyrinate	17926	C45H60N4O14	C45H54N4O14	-6	False
C06406_[cyt]	C06406	cyt	Precorrin 3B	27711	C43H50N4O17	C43H43N4O17	-7	False
C06407_[cyt]	C06407	cyt	Precorrin 4	16430	C44H52N4O17	C44H44N4O17	-8	False
C06408_[cyt]	C06408	cyt	Precorrin 8X	28629	C45H60N4O14	C45H53N4O14	-7	False
C06416_[cyt]	C06416	cyt	Precorrin 5	27630	C45H54N4O17	C45H46N4O17	-8	False
C06503_[cyt]	C06503	cyt	Hydrogenobyrinate a,c diamide	27914	C45H62N6O12	C45H58N6O12	-4	False
C06504_[cyt]	C06504	cyt	Cob(II)yrinate a,c diamide	27937	C45H61CoN6O12	C45CoH56N6O12	-4	False
C06505_[cyt]	C06505	cyt	Cob(I)yrinate a,c diamide	28531	C45H61CoN6O12	C45CoH57N6O12	-4	False
C06506_[cyt]	C06506	cyt	Adenosyl cobyrinate a,c diamide	2482	C55H73CoN11O15	C55CoH68N11O15	-4	False
C06507_[cyt]	C06507	cyt	Adenosyl cobyrinate hexaamide	2483	C55H77CoN15O11	C55CoH76N15O11	0	False
C06509_[cyt]	C06509	cyt	Adenosyl cobinamide phosphate	2481	C58H85CoN16O14P	C58CoH83N16O14P	-1	False
C06510_[cyt]	C06510	cyt	Adenosine-GDP-cobinamide	2479	C68H97CoN21O21P2	C68CoH95N21O21P2	-1	False
C06704_[cyt]	C06704	cyt	Iron chelate	-	R	-	-	False
C06704_[ext]	C06704	ext	Iron chelate	-	R	-	-	True
C07335_[cyt]	C07335	cyt	2-Amino-3-oxo-4-phosphonooxybutyrate	16273	C4H8NO7P	C4H6NO7P	-2	False
C08591_[cyt]	C08591	cyt	beta-Cryptoxanthin	10362	C40H56O	C40H56O	0	False
C08592_[cyt]	C08592	cyt	Echinenone	4746	C40H54O	C40H54O	0	False
C10385_[cym]	C10385	cym	Plastoquinone-9	28377	C53H80O2	C53H80O2	0	False
C10385_[cyt]	C10385	cyt	Plastoquinone-9	28377	C53H80O2	C53H80O2	0	False
C10385_[tlm]	C10385	tlm	Plastoquinone-9	28377	C53H80O2	C53H80O2	0	False
C10385_B6_S_[cym]	C10385	cym	Plastoquinone located at the stromal side of the Cytochrome-b6/f complex	28377	C53H80O2	C53H80O2	0	False
C10385_B6_S_[tlm]	C10385	tlm	Plastoquinone located at the stromal side of the Cytochrome-b6/f complex	28377	C53H80O2	C53H80O2	0	False
C10517_[cyt]	C10517	cyt	2-(beta-D-Glucosyl)-sn-glycerol 3-phosphate	16720	C9H19O11P	C9H17O11P	-2	False
C11355_[cyt]	C11355	cyt	4-Amino-4-deoxychorismate	18198	C10H11NO5	C10H10NO5	-1	False
C11434_[cyt]	C11434	cyt	2-C-Methyl-D-erythritol 4-phosphate	17764	C5H13O7P	C5H11O7P	-2	False
C11435_[cyt]	C11435	cyt	4-(Cytidine 5'-diphospho)-2-C-methyl-D-erythritol	16578	C14H25N3O14P2	C14H23N3O14P2	-2	False
C11436_[cyt]	C11436	cyt	2-Phospho-4-(cytidine 5'-diphospho)-2-C-methyl-D-erythritol	16840	C14H26N3O17P3	C14H22N3O17P3	-4	False
C11437_[cyt]	C11437	cyt	1-Deoxy-D-xylulose 5-phosphate	16493	C5H11O7P	C5H9O7P	-2	False
C11453_[cyt]	C11453	cyt	2-C-Methyl-D-erythritol 2,4-cyclodiphosphate	18425	C5H12O9P2	C5H10O9P2	-2	False
C11521_[cyt]	C11521	cyt	UDP-6-sulfoquinovose	15855	C15H24N2O19P2S	C15H21N2O19P2S	-3	False
C11546_[cyt]	C11546	cyt	2-(beta-D-Glucosyl)-sn-glycerol	17765	C9H18O8	C9H18O8	0	False
C11638_[cyt]	C11638	cyt	3-Amino-2-oxopropyl phosphate	1449	C3H8NO5P	C3H7NO5P	-1	False
C11811_[cyt]	C11811	cyt	1-Hydroxy-2-methyl-2-butenyl 4-diphosphate	15664	C5H12O8P2	C5H10O8P2	-2	False
C11829_[cyt]	C11829	cyt	13(1)-Hydroxy-magnesium-protoporphyrin IX 13-monomethyl ester	15434	C35H34MgN4O5	C35H33MgN4O5	-1	False
C11830_[cyt]	C11830	cyt	13(1)-Oxo-magnesium-protoporphyrin IX 13-monomethyl ester	15433	C35H32MgN4O5	C35H31MgN4O5	-1	False
C11831_[cyt]	C11831	cyt	Divinylprotochlorophyllide	30619	C35H30MgN4O5	C35H28MgN4O5	-2	False
C11907_[cyt]	C11907	cyt	4,6-Dideoxy-4-oxo-dTDP-D-glucose	-	C16H24N2O15P2	-	-	False
C12147_[cyt]	C12147	cyt	L-Threonine O-3-phosphate	37525	C4H10NO6P	C4H8NO6P	-2	False
C13309_[cyt]	C13309	cyt	2-Phytyl-1,4-naphthoquinone	31087	C30H44O2	C30H44O2	0	False
C13508_SQDG_[cyt]	C13508	cyt	Sulfoquinovosyldiacylglycerol	-	C11H16O12SR2	-	-	False
C14151_[cyt]	C14151	cyt	delta-Tocopherol	47772	C27H46O2	C27H46O2	0	False
C14152_[cyt]	C14152	cyt	beta-Tocopherol	47771	C28H48O2	C28H48O2	0	False
C14463_[cyt]	C14463	cyt	(R)-3-Hydroxy-3-methyl-2-oxopentanoate	34008	C6H10O4	C6H9O4	-1	False
C14818_[cyt]	C14818	cyt	Fe2+	29033	Fe	Fe	2	False
C14818_[ext]	C14818	ext	Fe2+	29033	Fe	Fe	2	True
C14819_[cyt]	C14819	cyt	Fe3+	29034	Fe	Fe	3	False
C14819_[ext]	C14819	ext	Fe3+	29034	Fe	Fe	3	True
C15547_[cyt]	C15547	cyt	1,4-Dihydroxy-2-naphthoyl-CoA	52668	C32H42N7O19P3S	C32H38N7O19P3S	-4	False
C15556_[cyt]	C15556	cyt	3,4-Dihydroxy-2-butanone 4-phosphate	50606	C4H9O6P	C4H7O6P	-2	False
C15667_[cyt]	C15667	cyt	5-Carboxyamino-1-(5-phospho-D-ribosyl)imidazole	48000	C9H14N3O9P	C9H11N3O9P	-3	False
C15670_[cyt]	C15670	cyt	Heme A	61715	C49H56FeN4O6	C49FeH54N4O6	-2	False
C15672_[cyt]	C15672	cyt	Heme O	36301	C49H58FeN4O5	C49FeH56N4O5	-2	False
C15811_[cyt]	C15811	cyt	[Enzyme]-cysteine	-	C4H6N2O2SR2	-	-	True
C15812_[cyt]	C15812	cyt	[Enzyme]-S-sulfanylcysteine	-	C4H6N2O2S2R2	-	-	True
C15882_[cyt]	C15882	cyt	2-Methyl-6-phytylquinol	-	C27H46O2	-	-	False
C15883_[cyt]	C15883	cyt	2,3-Dimethyl-5-phytylquinol	-	C28H48O2	-	-	False
C15966_[cyt]	C15966	cyt	3-Hydroxyechinenone	-	C40H54O2	-	-	False
C16160_[cyt]	C16160	cyt	Linoleoyl-[acyl-carrier protein]	-	C18H31OSR	-	-	False
C16161_[cyt]	C16161	cyt	alpha-Linolenoyl-ACP	-	C18H29OSR	-	-	False
C16219_[cyt]	C16219	cyt	3-Oxostearoyl-[acp]	-	C18H33O2SR	-	-	False
C16220_[cyt]	C16220	cyt	3-Hydroxyoctadecanoyl-[acp]	-	C18H35O2SR	-	-	False
C16221_[cyt]	C16221	cyt	(2E)-Octadecenoyl-[acp]	-	C18H33OSR	-	-	False
C16519_[cyt]	C16519	cyt	2-Succinyl-5-enolpyruvyl-6-hydroxy-3-cyclohexene-1-carboxylate	-	C14H16O9	-	-	False
C16520_[cyt]	C16520	cyt	Hexadecenoyl-[acyl-carrier protein]	-	C16H29OSR	-	-	False
C16695_[cym]	C16695	cym	Plastoquinol-9	28026	C53H82O2	C53H82O2	0	False
C16695_[tlm]	C16695	tlm	Plastoquinol-9	28026	C53H82O2	C53H82O2	0	False
C17556_[cyt]	C17556	cyt	di-trans,poly-cis-Undecaprenyl phosphate	60468	C55H91O4P	C55H89O4P	-2	False
C17570_[cyt]	C17570	cyt	2-Methyl-6-solanyl-1,4-benzoquinol	-	C52H80O2	-	-	False
E1_[ext]	-	ext	Photon	-	R	-	-	True
E1_[tlm]	-	tlm	Photon	-	R	-	-	False
E1_P680_[tlm]	-	tlm	Photons with 680nm wavelength	-	R	-	-	False
E1_P700_[tlm]	-	tlm	Photons with 700nm wavelength	-	R	-	-	False
E10_[cyt]	-	cyt	Cyanophycin	-	C10H17N5O4R	-	-	False
E10N_[cyt]	-	cyt	Cyanophycin polymer	-	R	-	-	True
E11_[cyt]	-	cyt	Peptidoglycan	-	C37H59N7O20	-	-	False
E17_[cyt]	-	cyt	gamma-Linolenoyl-ACP	-	C18H29OSR	-	-	False
E19_[cyt]	-	cyt	5-Deoxy-D-ribose	-	C5H10O4	-	-	False
E19_[ext]	-	ext	5-Deoxy-D-ribose	-	C5H10O4	-	-	True
E36_[cyt]	-	cyt	Stearidonoyl-[acp]	-	C18H27OSR	-	-	False
HB2p_B6_[cym]	-	cym	Heme B located in the Cytochrome-b6/f complex, twice protonated	-	R	-	-	False
HB2p_B6_[tlm]	-	tlm	Heme B located in the Cytochrome-b6/f complex, twice protonated	-	R	-	-	False
HB3p_B6_[cym]	-	cym	Heme B located in the Cytochrome-b6/f complex, triply protonated	-	R	-	-	False
HB3p_B6_[tlm]	-	tlm	Heme B located in the Cytochrome-b6/f complex, triply protonated	-	R	-	-	False
ORieske_B6_[cym]	-	cym	Oxidized rieske_B6	-	R	-	-	False
ORieske_B6_[tlm]	-	tlm	Oxidized rieske_B6	-	R	-	-	False
P680_[tlm]	-	tlm	Neutral reaction centre of the Photosystem II (light with 680 nm is sufficient for the excitation of the one reaction center)	-	R	-	-	False
P680p_[tlm]	-	tlm	Positive charged reaction centre of the Photosystem II (light with 680 nm is sufficient for the excitation of the one reaction center)	-	R	-	-	False
P700_[tlm]	-	tlm	Uncharged reaction centre of the Photosystem I (light with 700 nm is sufficient for the excitation of the one reaction center)	-	R	-	-	False
P700p_[tlm]	-	tlm	Positive charged reaction centre of the Photosystem I (light with 700 nm is sufficient for the excitation of the one reaction center)	-	R	-	-	False
PQH_B6_L_[cym]	-	cym	Plastosemiquinone located at the luminal side of the Cytochrome-b6/f complex	-	C53H81O2	-	-	False
PQH_B6_L_[tlm]	-	tlm	Plastosemiquinone located at the luminal side of the Cytochrome-b6/f complex	-	C53H81O2	-	-	False
PQH_B6_S_[cym]	-	cym	Plastosemiquinone located at the stromal side of the Cytochrome-b6/f complex	-	C53H81O2	-	-	False
PQH_B6_S_[tlm]	-	tlm	Plastosemiquinone located at the stromal side of the Cytochrome-b6/f complex	-	C53H81O2	-	-	False
PQn_P680_[tlm]	-	tlm	Semiplastoquinone radical loosely bound to the Photosystem II (can except one further electron)	-	C53H81O2	-	-	False
QA_P680_[tlm]	-	tlm	Internal bound plastoquinone of the Photosystem II	-	C53H80O2	-	-	False
QAn_P680_[tlm]	-	tlm	Internal bound semiquinone radical of the Photosystem II	-	C53H80O2	-	-	False
RRieske_B6_[cym]	-	cym	Reduced rieske_B6	-	R	-	-	False
RRieske_B6_[tlm]	-	tlm	Reduced rieske_B6	-	R	-	-	False
S0_P680_[tlm]	-	tlm	Starting state of a cluster of probably four manganese atoms	-	R	-	-	False
S1_P680_[tlm]	-	tlm	First oxidation state of the cluster of manganese atoms in the Photosystem II (needed for water splitting)	-	R	-	-	False
S2_P680_[tlm]	-	tlm	Second oxidation state of the cluster of manganese atoms in the Photosystem II (needed for water splitting)	-	R	-	-	False
S3_P680_[tlm]	-	tlm	Third oxidation state of the cluster of manganese atoms in the Photosystem II (needed for water splitting)	-	R	-	-	False
S4_P680_[tlm]	-	tlm	Fourth oxidation state of the cluster of manganese atoms in the Photosystem II (needed for water splitting)	-	R	-	-	False

## Sheet: Additional reactions
Genes and Reactions for addional reactions for the Synechocystis network not present in current databases
rID	genes	ec	reaction	Pathway	evid/relia	comment
R52	sll1336	3.5.3.6	L-Arginine_[cyt] + H2O_[cyt] => L-Citrulline_[cyt] + NH3_[cyt]	Arginine, Glutamate, Glutamine and Proline	B	Schriek et al. 2007
R53	slr1022	2.6.1.13	L-Ornithine_[cyt] + 2-Oxoglutarate_[cyt] <=> L-Glutamate 5-semialdehyde_[cyt] + L-Glutamate_[cyt]	Arginine, Glutamate, Glutamine and Proline	B	Schriek et al. 2007
R54	slr0782	1.4.3.4	L-Arginine_[cyt] + PQ_[tlm] + H2O_[cyt] => 5-Guanidino-2-oxopentanoate_[cyt] + NH3_[cyt] + PQH2_[tlm]	Arginine, Glutamate, Glutamine and Proline	B	Arginine dehydrogenase, Schriek et al. 2009
R55	slr0782	1.4.3.4	L-Arginine_[cyt] + PQ_[cym] + H2O_[cyt] => 5-Guanidino-2-oxopentanoate_[cyt] + NH3_[cyt] + PQH2_[cym]	Arginine, Glutamate, Glutamine and Proline	B	Arginine dehydrogenase, Schriek et al. 2009
R56	-	-	5-Guanidino-2-oxopentanoate_[cyt] + H2O2_[cyt] => 4-Guanidinobutanoate_[cyt] + CO2_[cyt] + H2O_[cyt]	Arginine, Glutamate, Glutamine and Proline	B	spontaneous, Schriek et al. 2007
R57	sll1077 or sll0228	3.5.3.7	4-Guanidinobutanoate_[cyt] + H2O_[cyt] => 4-Aminobutanoate_[cyt] + Urea_[cyt]	Arginine, Glutamate, Glutamine and Proline	B	Schriek et al. 2007
R59	sll0428 or sll0191	1.14.11.2	L-Proline_[cyt] + 2-Oxoglutarate_[cyt] + Oxygen_[cyt] => trans-4-Hydroxy-L-proline_[cyt] + Succinate_[cyt] + CO2_[cyt]	Arginine, Glutamate, Glutamine and Proline	C	BLAST search: sll0428 57 % identity, 257 score and E-value 8 e-70 and sll0191 48 % identity, 197 score and E-value 8 e-52 prolyl 4-hydroxylase from Trichodesmium erythraeum IMS101
R81	sll1713	4.1.1.81	L-Threonine O-3-phosphate_[cyt] => D-1-Aminopropan-2-ol O-phosphate_[cyt] + CO2_[cyt]	Asparagine, Aspartate, Lysine and Threonine	C	BLAST search: identity 57.5 %, score 414, E-value e-117, to threonine-phosphate decarboxylase from Anabaena variabilis ATCC 29413
R113	sll1237	1.3.3.4	2 Protoporphyrinogen IX_[cyt] + 3 Oxygen_[cyt] <=> 2 Protoporphyrin_[cyt] + 6 H2O_[cyt]	Chlorophyll	C	BLAST search: identity 54%, score 308, E-value 4e-85 to protoporphyrinogen oxidase from Anabaena sp. PCC 7120
R114	slr1923	1.3.1.75	Divinylprotochlorophyllide_[cyt] + NADPH_[cyt] + H+_[cyt] => Protochlorophyllide_[cyt] + NADP+_[cyt]	Chlorophyll	B	Ito et al. 2008; Islam et al. 2008
R126	slr1979	2.6.1.85	Chorismate_[cyt] + L-Glutamine_[cyt] => 4-Amino-4-deoxychorismate_[cyt] + L-Glutamate_[cyt]	Folate	C	BLAST search: 63.5 % identity, 574 Score and E-value e-165 to para-aminobenzoate synthase component I from Cyanothece sp. PCC 8801
R130	slr2141	1.5.1.20	5-Methyltetrahydrofolate_[cyt] + NADP+_[cyt] <= 5,10-Methylenetetrahydrofolate_[cyt] + NADPH_[cyt] + H+_[cyt]	Folate	C	BLAST search: 75 % identity, 450 Score and E-value e-128 to methylenetetrahydrofolate reductase from Cyanothece sp. PCC 8801 ; Unclear if NADP or NAD serves as electron acceptor
R135	slr0091	1.2.1.3	Glycolaldehyde_[cyt] + NAD+_[cyt] + H2O_[cyt] => Glycolate_[cyt] + NADH_[cyt] + H+_[cyt]	Folate	D	maybe catalyzed by the aldehyhyrogenase 1.2.1.21
R140	slr2026	1.5.1.3	Tetrahydrofolate_[cyt] + NADP+_[cyt] <= Dihydrofolate_[cyt] + NADPH_[cyt] + H+_[cyt]	Folate	D	slr2026 is coding for FoIP (2.5.1.15 ) which also can as a dihydropteroate reductase 1.5.1.3 (at least in H. pylori); Levin et al. 2007
R143	slr2141	1.5.1.20	5-Methyltetrahydrofolate_[cyt] + NAD+_[cyt] <= 5,10-Methylenetetrahydrofolate_[cyt] + NADH_[cyt] + H+_[cyt]	Folate	C	BLAST search: 75 % identity, 450 Score and E-value e-128 to methylenetetrahydrofolate reductase from Cyanothece sp. PCC 8801 ; Unclear if NADP or NAD serves as electron acceptor
R160	slr0600, slr1562, ssr2061	-	2 Glutathione_[cyt] + NADP+_[cyt] <=> Glutathione disulfide_[cyt] + NADPH_[cyt] + H+_[cyt]	General	B	Marteyn et al. 2009
R162	sll1973, slr1510, sll1848	-	1.2759 sn-Glycerol 3-phosphate_[cyt] + 1.3302 Hexadecanoyl-[acp]_[cyt] + 0.0774 Hexadecenoyl-[acp]_[cyt] + 0.0034 Octadecanoyl-[acp]_[cyt] + 0.0635 Oleoyl-[acyl-carrier protein_[cyt] + 0.4236 Linoleoyl-[acp]_[cyt] + 0.6315 gamma-Linolenoyl-[acp]_[cyt] + 0.0032 alpha-Linolenoyl-[acp]_[cyt] + 0.0190 Stearidonoyl-[acp]_[cyt] => Phosphatidate_MGDG_[cyt] + 2.5518 Acyl-carrier protein_[cyt]	Glycerolipid	-	combined reaction of 2.3.1.15 and 2.3.1.51
R163	sll1973, slr1510, sll1848	-	1.2954 sn-Glycerol 3-phosphate_[cyt] + 1.3061 Hexadecanoyl-[acp]_[cyt] + 0.0965 Hexadecenoyl-[acp]_[cyt] + 0.0223 Octadecanoyl-[acp]_[cyt] + 0.0584 Oleoyl-[acyl-carrier protein_[cyt] + 0.3334 Linoleoyl-[acp]_[cyt] + 0.7253 gamma-Linolenoyl-[acp]_[cyt] + 0.0095 alpha-Linolenoyl-[acp]_[cyt] + 0.0393 Stearidonoyl-[acp]_[cyt] => Phosphatidate_DGDG_[cyt] + 2.5908 Acyl-carrier protein_[cyt]	Glycerolipid	-	combined reaction of 2.3.1.15 and 2.3.1.51
R164	sll1973, slr1510, sll1848	-	1.3747 sn-Glycerol 3-phosphate_[cyt] + 1.5612 Hexadecanoyl-[acp]_[cyt] + 0.1804 Hexadecenoyl-[acp]_[cyt] + 0.0434 Octadecanoyl-[acp]_[cyt] + 0.4011 Oleoyl-[acyl-carrier protein_[cyt] + 0.5331 Linoleoyl-[acp]_[cyt] + 0.0228 gamma-Linolenoyl-[acp]_[cyt] + 0.0165 alpha-Linolenoyl-[acp]_[cyt] => Phosphatidate_SQDG_[cyt] + 2.7494 Acyl-carrier protein_[cyt]	Glycerolipid	-	combined reaction of 2.3.1.15 and 2.3.1.51
R165	sll1973, slr1510, sll1848	-	1.32535 sn-Glycerol 3-phosphate_[cyt] + 1.3327 Hexadecanoyl-[acp]_[cyt] + 0.0227 Hexadecenoyl-[acp]_[cyt] + 0.0457 Octadecanoyl-[acp]_[cyt] + 0.1701 Oleoyl-[acyl-carrier protein_[cyt] + 0.8637 Linoleoyl-[acp]_[cyt] + 0.2158 gamma-Linolenoyl-[acp]_[cyt] => Phosphatidate_PG_[cyt] + 2.6507 Acyl-carrier protein_[cyt]	Glycerolipid	-	combined reaction of 2.3.1.15 and 2.3.1.51
R166	sll0545	3.1.3.4	Phosphatidate_MGDG_[cyt] + H2O_[cyt] => 1,2-Diacyl-sn-glycerol_MGDG_[cyt] + Orthophosphate_[cyt]	Glycerolipid	B	Nakamura et al. 2007
R167	sll0545	3.1.3.4	Phosphatidate_DGDG_[cyt] + H2O_[cyt] => 1,2-Diacyl-sn-glycerol_DGDG_[cyt] + Orthophosphate_[cyt]	Glycerolipid	B	Nakamura et al, 2007
R168	sll0545	3.1.3.4	Phosphatidate_SQDG_[cyt] + H2O_[cyt] => 1,2-Diacyl-sn-glycerol_SQDG_[cyt] + Orthophosphate_[cyt]	Glycerolipid	B	Nakamura et al, 2007
R176	slr0384	2.4.1.-	UDP-6-sulfoquinovose_[cyt] + 1,2-Diacyl-sn-glycerol_SQDG_[cyt] => Sulfoquinovosyldiacylglycerol_SQDG_[cyt] + UDP_[cyt]	Glycerolipid	B	Güler et al. 2000
R177	sll1377	2.4.1.157	UDP-glucose_[cyt] + 1,2-Diacyl-sn-glycerol_MGDG_[cyt] => UDP_[cyt] + 3-D-Glucosyl-1,2-diacylglycerol_MGDG_[cyt]	Glycerolipid	B	Awai et al. 2006
R178	sll1377	2.4.1.157	UDP-glucose_[cyt] + 1,2-Diacyl-sn-glycerol_DGDG_[cyt] => UDP_[cyt] + 3-D-Glucosyl-1,2-diacylglycerol_DGDG_[cyt]	Glycerolipid	B	Awai et al. 2006
R181	slr1538	2.1.1.152	Precorrin 6X_[cyt] + Acetate_[cyt] + S-Adenosyl-L-homocysteine_[cyt] <= Precorrin 5_[cyt] + S-Adenosyl-L-methionine_[cyt] + H2O_[cyt]	Vitamin B12	C	BLAST search: identity 57.1 %, score 356, E-value e-104 to Cobalt-precorrin-6A synthase from Trichodesmium erythraeum IMS101 cobF
R188	sll0895	3.1.3.7	Adenosine 3',5'-bisphosphate_[cyt] + H2O_[cyt] => AMP_[cyt] + Orthophosphate_[cyt]	Cysteine, Glycine, Methionine and Sulfate	D	sll0895 is coding for CysQ, which is annotated in many organisms for 3.1.3.7
R197	sll1908	1.1.1.81	D-Glycerate_[cyt] + NADP+_[cyt] <=> Hydroxypyruvate_[cyt] + NADPH_[cyt] + H+_[cyt]	Cysteine, Glycine, Methionine and Sulfate	B	Eisenhut et al. 2008
R200	slr0229	1.1.1.60	D-Glycerate_[cyt] + NADP+_[cyt] <= Tartronate semialdehyde_[cyt] + NADPH_[cyt] + H+_[cyt]	Cysteine, Glycine, Methionine and Sulfate	B	Eisenhut et al. 2008
R201	sll1981	4.1.1.47	2 Glyoxylate_[cyt] => Tartronate semialdehyde_[cyt] + CO2_[cyt]	Cysteine, Glycine, Methionine and Sulfate	B	Eisenhut et al. 2008
R202	sll1556	1.2.3.5	Glyoxylate_[cyt] + Oxygen_[cyt] + H2O_[cyt] => Oxalate_[cyt] + H2O2_[cyt]	Cysteine, Glycine, Methionine and Sulfate	B	Eisenhut et al. 2008
R206	sll0006	2.6.1.4	Glycine_[cyt] + 2-Oxoglutarate_[cyt] <=> Glyoxylate_[cyt] + L-Glutamate_[cyt]	Cysteine, Glycine, Methionine and Sulfate	B	Eisenhut et al. 2008
R209	slr0633	1.4.3.19	Glycine_[cyt] + H2O_[cyt] + Oxygen_[cyt] => Glyoxylate_[cyt] + NH3_[cyt] + H2O2_[cyt]	Cysteine, Glycine, Methionine and Sulfate	C	BLAST search: identity 70.6 %, score 936, E-value 0.0 to glycine oxidase from Cyanothece sp. PCC 8801
R210	sll0895	3.1.3.7	3'-Phosphoadenylyl sulfate_[cyt] + H2O_[cyt] => Adenylyl sulfate_[cyt] + Orthophosphate_[cyt]	Cysteine, Glycine, Methionine and Sulfate	D	sll0895 is coding for CysQ, which is annotated in many organisms for 3.1.3.7
R213	slr0990	6.3.2.2	ATP_[cyt] + L-Glutamate_[cyt] + L-Cysteine_[cyt] => ADP_[cyt] + Orthophosphate_[cyt] + gamma-L-Glutamyl-L-cysteine_[cyt]	Glutathione	C	BLAST Search: 68 % identity, 540 score, E-value e-155 to glutamate-cysteine ligase from Cyanothece sp. PCC 8801
R220	slr1124	3.1.3.3	O-Phospho-L-serine_[cyt] + H2O_[cyt] => L-Serine_[cyt] + Orthophosphate_[cyt]	Cysteine, Glycine, Methionine and Serine	C,D	BLAST search: Identity 31 %, Score 102, E-value 2e-23 to PspA of Hydrogenobacter thermophilus PspA; Chiba et al. 2012
R220	slr1211	6.6.1.2	Hydrogenobyrinate a,c diamide_[cyt] + Cobalt ion_[cyt] + ATP_[cyt] + H2O_[cyt] => Cob(II)yrinate a,c diamide_[cyt] + Orthophosphate_[cyt] + ADP_[cyt] + H+_[cyt]	Vitamin B12	D	slr2026 is coding for FoIP (2.5.1.15 ) which also can as a dihydropteroate reductase 1.5.1.3 ( at least in H. pylori); Levin et al. 2007
R267	slr0953	3.1.3.24	Sucrose 6'-phosphate_[cyt] + H2O_[cyt] => Sucrose_[cyt] + Orthophosphate_[cyt]	Glycolysis and Sugar	B	Lunn 2002
R279	sll0084	3.1.3.15	L-Histidinol phosphate_[cyt] + H2O_[cyt] => L-Histidinol_[cyt] + Orthophosphate_[cyt]	Histidine	C	BLAST search: 56 % identity, 189 score and E-value e-49 to hisB from Cyanothece sp. ATCC 51142
R301	sll1564 or slr0186	2.3.1.182	Acetyl-CoA_[cyt] + Pyruvate_[cyt] + H2O_[cyt] => (R)-2-Methylmalate_[cyt] + CoA_[cyt]	Isoleucine, Leucine and Valine	B	Wu et al. 2010
R305	sll1722	5.5.1.4	D-Glucose 6-phosphate_[cyt] => 1D-myo-Inositol 3-phosphate_[cyt]	Inositol	B	Chatterje et al. 2004
R306	sll1981	5.5.1.4	D-Glucose 6-phosphate_[cyt] => 1D-myo-Inositol 3-phosphate_[cyt]	Heme	B	Chatterje et al. 2006
R309	sll1959	3.1.3.25	1D-myo-Inositol 3-phosphate_[cyt] + H2O_[cyt] => myo-Inositol_[cyt] + Orthophosphate_[cyt]	Inositol	B	Patra et al. 2006
R370	sll0541	1.14.19.1	Hexadecanoyl-[acp]_[cyt] + NADPH_[cyt] + H+_[cyt] + Oxygen_[cyt] <=> Hexadecenoyl-[acp]_[cyt] + NADP+_[cyt] + 2 H2O_[cyt]	Lipid	B	desC, delta-9 desaturase; Roughan et al. 1980; Browse et al. 1986
R371	sll0541	1.14.19.1	Octadecanoyl-[acp]_[cyt] + NADPH_[cyt] + H+_[cyt] + Oxygen_[cyt] <=> Oleoyl-[acp]_[cyt] + NADP+_[cyt] + 2 H2O_[cyt]	Lipid	B	desC, delta-9 desaturase; Roughan et al. 1980; Browse et al. 1986
R372	slr1508	2.4.1.184	2 1,2-Diacyl-3-beta-D-galactosyl-sn-glycerol_DGDG_[cyt] => Digalactosyl-diacylglycerol_DGDG_[cyt] + 1,2-Diacyl-sn-glycerol_DGDG_[cyt]	Glycerolipid	B	Awai et al. 2007
R373	sll0262	1.14.19.3	Linoleoyl-[acp]_[cyt] + NADPH_[cyt] + H+_[cyt] + Oxygen_[cyt] <=> gamma-Linolenoyl-[acp]_[cyt] + NADP+_[cyt] + 2 H2O_[cyt]	Lipid	B	desD, delta-6 desaturase; Roughan et al. 1980; Browse et al. 1986
R374	sll1441	1.14.19.-	Linoleoyl-[acp]_[cyt] + NADPH_[cyt] + H+_[cyt] + Oxygen_[cyt] <=> alpha-Linolenoyl-[acp]_[cyt] + NADP+_[cyt] + 2 H2O_[cyt]	Lipid	B	desB, delta-15 desaturase; Roughan et al. 1980; Browse et al. 1986
R375	sll0262	1.14.19.3	alpha-Linolenoyl-[acp]_[cyt] + NADPH_[cyt] + H+_[cyt] + Oxygen_[cyt] <=> Stearidonoyl-[acp]_[cyt] + NADP+_[cyt] + 2 H2O_[cyt]	Lipid	B	desD, delta-6 desaturase; Roughan et al. 1980; Browse et al. 1986
R393	sll1363	1.1.1.86	(R)-Pantoate_[cyt] + NADP+_[cyt] <=> 2-Dehydropantoate_[cyt] + NADPH_[cyt] + H+_[cyt]	Pantothenate and CoA	D	sll1363 is coding for Isoleucine, Leucine and ValineC (1.1.1.86) which also can as 2-dehydropantoate 2-reductase (at least in C. glutamicum); Merkamm et al. 2003
R416	sll1833	2.4.1.129	Undecaprenyl-diphospho-N-acetylmuramoyl-(N-acetylglucosamine)-L-alanyl-D-glutamyl-meso-2,6-diaminopimeloyl-D-alanyl-D-alanine_[cyt] + H2O_[cyt] => di-trans,poly-cis-Undecaprenyl diphosphate_[cyt] + [GlcNAc-(1->4)-Mur2Ac(oyl-L-Ala-g-D-Glu-A2pm-D-Ala-D-Ala)	Peptidoglycan	C	BLAST search: identity 56%, score 670, E-value 0.0 to Peptidoglycan glycosyltransferasefrom Cyanothece sp. PCC 7424
R438	sll0529	4.1.2.22	D-Fructose 6-phosphate_[cyt] + Orthophosphate_[cyt] => Acetyl phosphate_[cyt] + D-Erythrose 4-phosphate_[cyt] + H2O_[cyt]	Pentose phosphate pathway	C	BLAST search: identity 80.4 %, score 1203, E-value 0.0 to D-xylulose 5-phosphate/D-fructose 6-phosphate phosphoketolase from Cyanothece sp. PCC 8801
R439	slr0453	4.1.2.22	D-Fructose 6-phosphate_[cyt] + Orthophosphate_[cyt] => Acetyl phosphate_[cyt] + D-Erythrose 4-phosphate_[cyt] + H2O_[cyt]	Pentose phosphate pathway	C	BLAST search: identity 67 %, score 1163, E-value 0.0 to D-xylulose 5-phosphate/D-fructose 6-phosphate phosphoketolase from Acaryochloris marina MBIC11017
R440	sll0529	4.1.2.22	D-Xylulose 5-phosphate_[cyt] + Orthophosphate_[cyt] => Acetyl phosphate_[cyt] + D-Glyceraldehyde 3-phosphate_[cyt] + H2O_[cyt]	Pentose phosphate pathway	C	BLAST search: identity 80.4 %, score 1203, E-value 0.0 to D-xylulose 5-phosphate/D-fructose 6-phosphate phosphoketolase from Cyanothece sp. PCC 8801
R441	slr0453	4.1.2.22	D-Xylulose 5-phosphate_[cyt] + Orthophosphate_[cyt] => Acetyl phosphate_[cyt] + D-Glyceraldehyde 3-phosphate_[cyt] + H2O_[cyt]	Pentose phosphate pathway	C	BLAST search: identity 67 %, score 1163, E-value 0.0 to D-xylulose 5-phosphate/D-fructose 6-phosphate phosphoketolase from Acaryochloris marina MBIC11017
R447	slr1350	1.14.19.-	Oleoyl-[acp]_[cyt] + NADPH_[cyt] + H+_[cyt] + Oxygen_[cyt] <=> Linoleoyl-[acp]_[cyt] + NADP+_[cyt] + 2 H2O_[cyt]	Lipid	B	desA, delta-12 desaturase; Roughan et al. 1980; Browse et al. 1986
R481	sll0226, sll0629, sll0634, sll0819, slr0171, slr0737, slr0823, slr0823, slr1655, slr1834, slr1835, sml0008, smr0004, smr0005, ssl0563, ssr0390, ssr2831	-	1 Photon_P700_[tlm] + 1 P700_[tlm] + 1 Oxygen_[cyt] => 1 P700p_[tlm] + 1 Superoxide anion_[cyt]	General	-	Mehler reaction at PSI
R482	sll0550, sll1521	-	2 NADPH_[cyt] + 2 H+_[cyt] + Oxygen_[cyt] => 2 NADP+_[cyt] + 2 H2O_[cyt]	General	-	Mehler-like reaction; Allahverdiyeva et al. 2011
R483	sll0258, sll0427, sll0849, sll0851, sll1194, sll1398, sll1418, sll1867, slr0906, slr0927, slr1181, slr1311, slr1645, slr1739, slr2034, sml0001, sml0002, sml0003, sml0005, sml0007, smr0001, smr0006, smr0007, smr0008, smr0009, ssl2598, ssr3451, sll0217, sll	-	1 Oxygen_[cyt] + 1 QAn_P680_[tlm] => 1 Superoxide anion_[cyt] + 1 QA_P680_[tlm]	General	-	ROS evolution at PSII
R524	sll0741	1.2.7.1	2 Reduced ferredoxin_[cyt] + Acetyl-CoA_[cyt] + CO2_[cyt] + 2 H+_[cyt] <= 2 Oxidized ferredoxin_[cyt] + Pyruvate_[cyt] + CoA_[cyt]	Pyruvate and TCA	C	BLAST search: 77 % identity, 1940 score and E-value 0 to pyruvate-flavodoxin oxidoreductase from Micorystis aeruginosa; flavodoxin replaced by ferredoxin
R526	sll1359	1.2.2.1	Formate_[cyt] + 2 Ferricytochrome b1_[cyt] => CO2_[cyt] + 2 Ferrocytochrome b1_[cyt] + 2 H+_[cyt]	Pyruvate and TCA	B	Eisenhut et al. 2008
R529	sll1981	4.1.1.71	2-Oxoglutarate_[cyt] => Succinate semialdehyde_[cyt] + CO2_[cyt]	Pyruvate and TCA	C	BLAST Search: identity 80%, score 911, E-value 0.0 to SYNPCC7002_A2770 to 2-Oxoglutarate decarboxylase; Zhang and Bryant 2011
R531	slr1022	2.6.1.19	4-Aminobutanoate_[cyt] + 2-Oxoglutarate_[cyt] <=> Succinate semialdehyde_[cyt] + L-Glutamate_[cyt]	Pyruvate and TCA	B	Schriek et al. 2007
R563	slr0861	2.1.2.2	5'-Phosphoribosylglycinamide_[cyt] + Formate_[cyt] + ATP_[cyt] => 5'-Phosphoribosyl-N-formylglycinamide_[cyt] + ADP_[cyt] + Orthophsophate_[cyt]	Purine	B	PurT reaction of GAR transformylase; Marolewski et al. 1997
R599	sll1797	4.1.3.40	4-Hydroxybenzoate_[cyt] + Pyruvate_[cyt] <= Chorismate_[cyt]	Quinone and Tocopherol	B	BLAST search: identity 46 %, score 162, E-value 6e-42 to 4-hydroxybenzoate synthetase from Prochlorococcus marinus str. MIT 9303, need for plastoquinone-9 biosynthesis; Sadre et al. 2011
R600	slr0926	2.5.1.39	all-trans-Nonaprenyl diphosphate_[cyt] + 4-Hydroxybenzoate_[cyt] => Diphosphate_[cyt] + 3-Nonaprenyl-4-hydroxybenzoate_[cyt]	Quinone and Tocopherol	B	PlqA; Sadre et al. 2011
R601	sll0936 or slr1099 or slr1300	-	3-Nonaprenyl-4-hydroxybenzoate_[cyt] + 4 H+_[cyt] => 2-Methyl-6-solanyl-1,4-benzoquinol_[cyt] + H2O_[cyt]	Quinone and Tocopherol	D	Unknown reaction; combined steps of the plastoquinone biosynthesis (Sadre et al. 2011)
R617	sll0400	3.1.3.-	5-Amino-6-(5'-phosphoribitylamino)uracil_[cyt] + H2O_[cyt] <=> 5-Amino-6-(1-D-ribitylamino)uracil_[cyt] + Orthophosphate_[cyt]	Riboflavin	D	Needed for FAD synthesis, sll0400 can be a candidate gene for the reaction
R624	slr0945	1.5.1.38	Reduced FMN_[cyt] + NADP+_[cyt] <=> FMN_[cyt] + NADPH_[cyt] + H+_[cyt]	Riboflavin	C	BLAST search: identity 87.6 %, score 363, E-value e-102 to NADPH-dependent FMN reductase from Cyanothece sp. ATCC 51142
R625	slr1790	1.3.3.4	2 Protoporphyrinogen IX_[cyt] + 3 Oxygen_[cyt] <=> 2 Protoporphyrin_[cyt] + 6 H2O_[cyt]	Chlorophyll	B	Kato et al. 2010
R665	slr0118	-	Aminoimidazole ribotide_[cyt] + S-Adenosyl-L-methionine_[cyt] <=> 4-Amino-2-methyl-5-phosphomethylpyrimidine_[cyt] + L-Methionine_[cyt] + 5'-Deoxyadenosine_[cyt] + Formate_[cyt] + Carbon monoxide_[cyt]	Thiamine pyrophosphate	D	ThiC, ThiD not annotated, combined reaction
R667	ssr0102, slr0633	-	L-Cysteine_[cyt] + ATP_[cyt] + 1-Deoxy-D-xylulose 5-phosphate_[cyt] + L-Tyrosine_[cyt] + S-Adenosyl-L-methionine_[cyt] + NADPH_[cyt] + 3 H+_[cyt] => 4-Methyl-5-(2-phosphoethyl)-thiazole_[cyt] + Diphosphate_[cyt] + L-Methionine_[cyt] + L-Alanine_[cyt] + 4-	Thiamine pyrophosphate	D	BLAST search: ssr0102 identity 68 %, score 98, E-value 2e-22 to ThiS from Nostoc punctiforme ATCC 29133, combined reaction with ThiG, single steps are unknow or poorly analyzed
R713	slr0401	-	ATP_[cyt] + H2O_[cyt] + Putrescine_[ext] => ADP_[cyt] + Orthophosphate_[cyt] + Putrescine_[cyt]	Transport	B	Raksajit et al. 2009; Brandt et al. 2010
R714	slr0401	-	ATP_[cyt] + H2O_[cyt] + Spermidine_[ext] => ADP_[cyt] + Orthophosphate_[cyt] + Spermidine_[cyt]	Transport	B	Raksajit et al. 2009; Brandt et al. 2010
R743	slr1719 or slr0001	1.14.99.40	Reduced FMN_[cyt] + Oxygen_[cyt] + NADH_[cyt] + H+_[cyt] => Dimethylbenzimidazole_[cyt] + D-Erythrose 4-phosphate_[cyt] + H2O_[cyt] + NAD+_[cyt]	Riboflavin	D	BLAST search: slr1719 identity 67 %, score 278, E-value 3e-76 to nitroreductase from Trichodesmium erythraeum IMS101; also 1.16.8.1 is capable to catalyze this reaction; reaction stoichiometry unclear up to now, unknown metabolite is produced
R752	slr1281, sll1732, sll0520, sll0027, ssr1386, slr0844, sll0223, sll1733, sll0522, sll0519, slr1291, slr0331, sll0521, sll0026, slr1279, slr0261, slr1280, slr1623, sll1262, slr2007, slr2009, ssl0352	1.6.5.3	NADPH_[cyt] + 5 H+_[cyt] + PQ_[tlm] => NADP+_[cyt] + PQH2_[tlm] + 4 H+_[tll]	General	-	cyclic electron flow at PSI; Mi et al. 1992;Ogawa and Mi 2007; Battchikova 2011
R753	slr0001	1.16.8.1	2 Cob(II)yrinate a,c diamide_[cyt] + Reduced FMN_[cyt] <=> 2 Cob(I)yrinate a,c diamide_[cyt] + FMN_[cyt] + 2 H+_[cyt]	Vitamin B12	C	BLAST search: identity 31 %, Score 57, E-value 4e-10 to 4-hydroxyphenylacetate 3-monooxygenase from B. melitensis which can act as a corrin reductase; Lawrence et al. 2008
R758	sll1500	2.4.2.21	Nicotinate D-ribonucleotide_[cyt] + Dimethylbenzimidazole_[cyt] => Nicotinate_[cyt] + N1-(5-Phospho-alpha-D-ribosyl)-5,6-dimethylbenzimidazole_[cyt] + H+_[cyt]	Vitamin B12	C	BLAST search: identity 61 %, score 439, E-value e-124 to Nicotinate-nucleotide-dimethylbenzimidazole phosphoribosyltransferase from Cyanothece sp. PCC 8801
R759	slr1124	3.1.3.73	N1-(5-Phospho-alpha-D-ribosyl)-5,6-dimethylbenzimidazole_[cyt] + H2O_[cyt] => alpha-Ribazole_[cyt] + Orthophosphate_[cyt]	Vitamin B12	C	BLAST search: identity 46 %, score 397, E-value e-112 to putative alpha-ribazole-5'-P phosphatase von Synechococcus sp. CC9902
Reactions included in the model to complete synthesis pathways. Corresponding genes could not be identified.
R77	-	-	ATP_[cyt] + L-Aspartate_[cyt] + L-Glutamine_[cyt] + H2O_[cyt] => AMP_[cyt] + Diphosphate_[cyt] + L-Asparagine_[cyt] + L-Glutamate_[cyt]	Asparagine, Aspartate, Lysine and Threonine	E	No enzyme for the synthesis of asparagine could been identified for Synechocystis sp. PCC6803
R174	-	3.1.3.27	Phosphatidylglycerophosphate_PG_[cyt] + H2O_[cyt] => Phosphatidylglycerol_PG_[cyt] + Orthophosphate_[cyt]	Glycerolipid	E	no gene could be identified, needed for the synthesis of phosphatidylglycerol
R179	-	-	3-D-Glucosyl-1,2-diacylglycerol_MGDG_[cyt] <=> 1,2-Diacyl-3-beta-D-galactosyl-sn-glycerol_MGDG_[cyt]	Glycerolipid	E	unknown epimerase, Awai et al. 2006
R180	-	-	3-D-Glucosyl-1,2-diacylglycerol_DGDG_[cyt] <=> 1,2-Diacyl-3-beta-D-galactosyl-sn-glycerol_DGDG_[cyt]	Glycerolipid	E	unknown epimerase, Awai et al. 2006
R207	-	2.3.1.31	Acetyl-CoA_[cyt] + L-Homoserine_[cyt] => CoA_[cyt] + O-Acetyl-L-homoserine_[cyt]	Cysteine, Glycine, Methionine and Sulfate	E	no pathway for the synthesis of methionine could been identified for Synechocystis sp. PCC6803; transferred pathyway from Microcystis aeruginosa
R208	-	2.5.1.49	O-Acetyl-L-homoserine_[cyt] + Hydrogen sulfide_[cyt] => L-Homocysteine_[cyt] + Acetate_[cyt]	Cysteine, Glycine, Methionine and Sulfate	E	no pathway for the synthesis of methionine could been identified for Synechocystis sp. PCC6803; transferred pathyway from Microcystis aeruginosa
R212	-	4.1.1.50	S-Adenosyl-L-methionine_[cyt] + H+_[cyt] => S-Adenosylmethioninamine_[cyt] + CO2_[cyt]	Cysteine, Glycine, Methionine and Sulfate	E	No genes could be identified; Jantaro et al. 2003
R219	-	2.6.1.52	O-Phospho-L-serine_[cyt] + 2-Oxoglutarate_[cyt] <=> 3-Phosphonooxypyruvate_[cyt] + L-Glutamate_[cyt]	Cysteine, Glycine, Methionine and Serine	E	unknown transaminase
R258	-	2.7.7.9	UTP_[cyt] + D-Glucose 1-phosphate_[cyt] <=> Diphosphate_[cyt] + UDP-glucose_[cyt]	Glycolysis and Sugar	E	no gene could be identified for UDP-glucose phosphorylase (2.7.7.9.)
R380	-	3.6.1.54	UDP-2,3-bis(3-hydroxytetradecanoyl)glucosamine_[cyt] + H2O_[cyt] => UMP_[cyt] + Lipid X_[cyt]	Lipid-A-disaccharide	E	No genes could be identified
R557	-	-	5'-Deoxyadenosine_[cyt] + H2O_[cyt] => 5-Deoxy-D-ribose_[cyt] + Adenine_[cyt]	Purine	E	unknown nucleosidase, needed for degradation/further consumption of 5'-Deoxyadenosine
R630	-	2.5.1.16	S-Adenosylmethioninamine_[cyt] + Putrescine_[cyt] => 5'-Methylthioadenosine_[cyt] + Spermidine_[cyt] + H+_[cyt]	Stress	E	No genes could be identified; Jantaro et al. 2003
R631	-	2.5.1.16	S-Adenosylmethioninamine_[cyt] + Spermidine_[cyt] => 5'-Methylthioadenosine_[cyt] + Spermine_[cyt] + H+_[cyt]	Stress	E	No genes could be identified; Jantaro et al. 2003
R666	-	-	ATP_[cyt] + 4-Amino-2-methyl-5-phosphomethylpyrimidine_[cyt] => ADP_[cyt] + 2-Methyl-4-amino-5-hydroxymethylpyrimidine diphosphate_[cyt]	Thiamine pyrophosphate	E	No genes could be identified
R731	-	1.2.1.72	D-Erythrose 4-phosphate_[cyt] + NAD+_[cyt] + H2O_[cyt] => 4-Phospho-D-erythronate_[cyt] + NADH_[cyt] + H+_[cyt]	Vitamin B6	E	No genes could be identified; Mittenhuber 2001
R732	-	1.1.1.290	4-Phospho-D-erythronate_[cyt] + NAD+_[cyt] => 2-Oxo-3-hydroxy-4-phosphobutanoate_[cyt] + NADH_[cyt] + H+_[cyt]	Vitamin B6	E	No genes could be identified; Mittenhuber 2001
R733	-	2.6.1.52	O-Phospho-4-hydroxy-L-threonine_[cyt] + 2-Oxoglutarate_[cyt] <=> 2-Oxo-3-hydroxy-4-phosphobutanoate_[cyt] + L-Glutamate_[cyt]	Vitamin B6	E	No genes could be identified; Mittenhuber 2001
R740	-	1.14.13.83	Precorrin 3A_[cyt] + Oxygen_[cyt] + NADH_[cyt] + H+_[cyt] => Precorrin 3B_[cyt] + NAD+_[cyt] + H2O_[cyt]	Vitamin B12	E	No genes could be identified for a Precorrin-3B synthase; Rodionov et al. 2003

## Sheet: Reference
Allahverdiyeva, Y., Ermakova, M., Eisenhut, M., Zhang, P., Richaud, P., Hagemann, M., Cournac, L., and Aro, E.-M. (2011). Interplay between flavodiiron proteins and photorespiration in Synechocystis sp. PCC 6803. J. Biol. Chem. 286, 24007–24014.
Awai, K., Kakimoto, T., Awai, C., Kaneko, T., Nakamura, Y., Takamiya, K., Wada, H., and Ohta, H. (2006). Comparative Genomic Analysis Revealed a Gene for Monoglucosyldiacylglycerol Synthase, an Enzyme for Photosynthetic Membrane Lipid Synthesis in Cyanoba
Awai, K., Watanabe, H., Benning, C., and Nishida, I. (2007). Digalactosyldiacylglycerol is Required for Better Photosynthetic Growth of Synechocystis sp. PCC6803 Under Phosphate Limitation. Plant and Cell Physiology 48, 1517 –1523.
Bartsch, O., Hagemann, M., and Bauwe, H. (2008). Only plant-type (GLYK) glycerate kinases produce d-glycerate 3-phosphate. FEBS Letters 582, 3025–3028.
Battchikova, N., Eisenhut, M., and Aro, E.-M. (2011a). Cyanobacterial NDH-1 complexes: novel insights and remaining puzzles. Biochim. Biophys. Acta 1807, 935–944.
Battchikova, N., Wei, L., Du, L., Bersanini, L., Aro, E.-M., and Ma, W. (2011b). Identification of Novel Ssl0352 Protein (NdhS), Essential for Efficient Operation of Cyclic Electron Transport around Photosystem I, in NADPH:plastoquinone Oxidoreductase (ND
Brandt, A.-M., Raksajit, W., Yodsang, P., Mulo, P., Incharoensakdi, A., Salminen, T.A., and Mäenpää, P. (2010). Characterization of the substrate-binding PotD subunit in Synechocystis sp. strain PCC 6803. Archives of Microbiology 192, 791–801.
Breitenbach, J., Fernández-González, B., Vioque, A., and Sandmann, G. (1998). A higher-plant type zeta-carotene desaturase in the cyanobacterium Synechocystis PCC6803. Plant Mol. Biol. 36, 725–732.
Breitenbach, J., Vioque, A., and Sandmann, G. (2001). Gene sll0033 from Synechocystis 6803 encodes a carotene isomerase involved in the biosynthesis of all-E lycopene. Z. Naturforsch., C, J. Biosci. 56, 915–917.
Browse, J., Warwick, N., Somerville, C.R., and Slack, C.R. (1986). Fluxes through the prokaryotic and eukaryotic pathways of lipid synthesis in the “16:3” plant Arabidopsis thaliana. Biochem. J. 235, 25–31.
Chatterjee, A., Dastidar, K.G., Maitra, S., Das-Chatterjee, A., Dihazi, H., Eschrich, K., and Majumder, A.L. (2006). sll1981, an acetolactate synthase homologue of Synechocystis sp. PCC6803, functions as L-myo-inositol 1-phosphate synthase. Planta 224, 36
Chatterjee, A., Majee, M., Ghosh, S., and Majumder, A.L. (2004). sll1722, an unassigned open reading frame of Synechocystis PCC 6803, codes for L-myo-inositol 1-phosphate synthase. Planta 218, 989–998.
Cheng, Z., Sattler, S., Maeda, H., Sakuragi, Y., Bryant, D.A., and DellaPenna, D. (2003). Highly Divergent Methyltransferases Catalyze a Conserved Reaction in Tocopherol and Plastoquinone Synthesis in Cyanobacteria and Photosynthetic Eukaryotes. Plant Cel
Chiba, Y., Oshima, K., Arai, H., Ishii, M., and Igarashi, Y. (2012). Discovery and analysis of cofactor-dependent phosphoglycerate mutase homologs as novel phosphoserine phosphatases in Hydrogenobacter thermophilus. J. Biol. Chem. 287, 11934–11941.
Cooley, J.W., and Vermaas, W.F.J. (2001). Succinate Dehydrogenase and Other Respiratory Pathways in Thylakoid Membranes of Synechocystis sp. Strain PCC 6803: Capacity Comparisons and Physiological Function. J. Bacteriol. 183, 4251–4258.
Dähnhardt, D., Falk, J., Appel, J., van der Kooij, T.A.., Schulz-Friedrich, R., and Krupinska, K. (2002). The hydroxyphenylpyruvate dioxygenase from Synechocystis sp. PCC 6803 is not required for plastoquinone biosynthesis. FEBS Letters 523, 177–181.
Eisenhut, M., Ruth, W., Haimovich, M., Bauwe, H., Kaplan, A., and Hagemann, M. (2008). The photorespiratory glycolate metabolism is essential for cyanobacteria and might have been conveyed endosymbiontically to plants. Proc. Natl. Acad. Sci. U.S.A. 105, 1
Flores, E., Frías, J.E., Rubio, L.M., and Herrero, A. (2005). Photosynthetic nitrate assimilation in cyanobacteria. Photosynthesis Research 83, 117–133.
Graziani, S., Xia, Y., Gurnon, J.R., Van Etten, J.L., Leduc, D., Skouloubris, S., Myllykallio, H., and Liebl, U. (2004). Functional analysis of FAD-dependent thymidylate synthase ThyX from Paramecium bursaria Chlorella virus-1. J. Biol. Chem. 279, 54340–5
Güler, S., Essigmann, B., and Benning, C. (2000). A Cyanobacterial Gene, sqdX, Required for Biosynthesis of the Sulfolipid Sulfoquinovosyldiacylglycerol. J. Bacteriol. 182, 543–545.
Hohmann-Marriott, M.F., and Blankenship, R.E. (2011). Evolution of photosynthesis. Annu Rev Plant Biol 62, 515–548.
Hudson, A.O., Singh, B.K., Leustek, T., and Gilvarg, C. (2006). An LL-Diaminopimelate Aminotransferase Defines a Novel Variant of the Lysine Biosynthesis Pathway in Plants. Plant Physiology 140, 292 –301.
Incharoensakdi, A., Jantaro, S., Raksajit, W. & Mäenpää, P. (2010). Polyamines in cyanobacteria: biosynthesis, transport and abiotic stress response. - In: Mendez-Vilas, A. (ed.) Current Research, Technology and Education Topics in Applied Microbiology a
Islam, M.R., Aikawa, S., Midorikawa, T., Kashino, Y., Satoh, K., and Koike, H. (2008). slr1923 of Synechocystis sp. PCC6803 Is Essential for Conversion of 3,8-Divinyl(proto)chlorophyll(ide) to 3-Monovinyl(proto)chlorophyll(ide). Plant Physiology 148, 1068
Ito, H., Yokono, M., Tanaka, R., and Tanaka, A. (2008). Identification of a Novel Vinyl Reductase Gene Essential for the Biosynthesis of Monovinyl Chlorophyll in Synechocystis sp. PCC6803. Journal of Biological Chemistry 283, 9002–9011.
Jantaro, S., Mäenpä?, P., Mulo, P., and Incharoensakdi, A. (2003). Content and biosynthesis of polyamines in salt and osmotically stressed cells of Synechocystis sp. PCC 6803. FEMS Microbiology Letters 228, 129–135.
Johnson, T.W., Shen, G., Zybailov, B., Kolling, D., Reategui, R., Beauparlant, S., Vassiliev, I.R., Bryant, D.A., Jones, A.D., Golbeck, J.H., et al. (2000). Recruitment of a Foreign Quinone into the A1 Site of Photosystem I. Journal of Biological Chemistr
Jurgens, U.J., Drews, G., and Weckesser, J. (1983). Primary structure of the peptidoglycan from the unicellular cyanobacterium Synechocystis sp. strain PCC 6714. J. Bacteriol. 154, 471–478.
Katoh, H., Hagino, N., Grossman, A.R., and Ogawa, T. (2001). Genes Essential to Iron Transport in the Cyanobacterium Synechocystis sp. Strain PCC 6803. J Bacteriol 183, 2779–2784.
Kato, K., Tanaka, R., Sano, S., Tanaka, A., and Hosaka, H. (2010). Identification of a gene essential for protoporphyrinogen IX oxidase activity in the cyanobacterium Synechocystis sp. PCC6803. Proc. Natl. Acad. Sci. U.S.A. 107, 16649–16654.
Lawrence, A.D., Deery, E., McLean, K.J., Munro, A.W., Pickersgill, R.W., Rigby, S.E.J., and Warren, M.J. (2008). Identification, characterization, and structure/function analysis of a corrin reductase involved in adenosylcobalamin biosynthesis. The Journa
Levin, I., Mevarech, M., and Palfey, B.A. (2007). Characterization of a novel bifunctional dihydropteroate synthase/dihydropteroate reductase enzyme from Helicobacter pylori. J. Bacteriol. 189, 4062–4069.
Lunn, J.E. (2002). Evolution of Sucrose Synthesis. Plant Physiol 128, 1490–1500.
Marolewski, A.E., Mattia, K.M., Warren, M.S., and Benkovic, S.J. (1997). Formyl Phosphate: A Proposed Intermediate in the Reaction Catalyzed by Escherichia coli PurT GAR Transformylase†. Biochemistry 36, 6709–6716.
Marteyn, B., Domain, F., Legrain, P., Chauvat, F., and Cassier-Chauvat, C. (2009). The thioredoxin reductase-glutaredoxins-ferredoxin crossroad pathway for selenate tolerance in Synechocystis PCC6803. Mol. Microbiol. 71, 520–532.
Masamoto, K., Wada, H., Kaneko, T., and Takaichi, S. (2001). Identification of a Gene Required for Cis-to-Trans Carotene Isomerization in Carotenogenesis of the Cyanobacterium Synechocystis Sp. PCC 6803. Plant Cell Physiol 42, 1398–1402.
Matsuda, N., Kobayashi, H., Katoh, H., Ogawa, T., Futatsugi, L., Nakamura, T., Bakker, E.P., and Uozumi, N. (2004). Na+-dependent K+ Uptake Ktr System from the Cyanobacterium Synechocystis sp. PCC 6803 and Its Role in the Early Phases of Cell Adaptation t
Melo, A.M.P., Bandeiras, T.M., and Teixeira, M. (2004). New Insights into Type II NAD(P)H:Quinone Oxidoreductases. Microbiol Mol Biol Rev 68, 603–616.
Merkamm, M., Chassagnole, C., Lindley, N.D., and Guyonvarch, A. (2003). Ketopantoate reductase activity is only encoded by ilvC in Corynebacterium glutamicum. Journal of Biotechnology 104, 253–260.
Mi, H., Endo, T., Schreiber, U., Ogawa, T., and Asada, K. (1992). Electron Donation from Cyclic and Respiratory Flows to the Photosynthetic Intersystem Chain is Mediated by Pyridine Nucleotide Dehydrogenase in the Cyanobacterium Synechocystis PCC 6803. Pl
Mittenhuber, G. (2001). Phylogenetic analyses and comparative genomics of vitamin B6 (pyridoxine) and pyridoxal phosphate biosynthesis pathways. J. Mol. Microbiol. Biotechnol. 3, 1–20.
Nakahara, K., Yamamoto, H., Miyake, C., and Yokota, A. (2003). Purification and Characterization of Class-I and Class-II Fructose-1,6-bisphosphate Aldolases from the Cyanobacterium Synechocystis sp. PCC 6803. Plant Cell Physiol. 44, 326–333.
Nakamura, Y., Tsuchiya, M., and Ohta, H. (2007). Plastidic Phosphatidic Acid Phosphatases Identified in a Distinct Subfamily of Lipid Phosphate Phosphatases with Prokaryotic Origin. Journal of Biological Chemistry 282, 29013 –29021.
Ogawa, T., and Mi, H. (2007). Cyanobacterial NADPH dehydrogenase complexes. Photosynthesis Research 93, 69–77.
Patra, B., Ghosh Dastidar, K., Maitra, S., Bhattacharyya, J., and Majumder, A.L. (2007). Functional identification of sll1383 from Synechocystis sp PCC 6803 as L-myo-inositol 1-phosphate phosphatase (EC 3.1.3.25): molecular cloning, expression and charact
Price, G.D., Woodger, F.J., Badger, M.R., Howitt, S.M., and Tucker, L. (2004). Identification of a SulP-type bicarbonate transporter in marine cyanobacteria. Proceedings of the National Academy of Sciences 101, 18228 –18233.
Quintero, M.J., Montesinos, M.L., Herrero, A., and Flores, E. (2001). Identification of Genes Encoding Amino Acid Permeases by Inactivation of Selected ORFs from the Synechocystis Genomic Sequence. Genome Research 11, 2034 –2040.
Raksajit, W., Yodsang, P., Maenpaa, P., and Incharoensakdi, A. (2009). Characterization of spermidine transport system in a cyanobacterium,synechocystis sp. PCC 6803. J. Microbiol. Biotechnol. 19, 447–454.
Rasmusson, A.G., Geisler, D.A., and Møller, I.M. (2008). The multiplicity of dehydrogenases in the electron transport chain of plant mitochondria. Mitochondrion 8, 47–60.
Rodionov, D.A. (2003). Comparative Genomics of the Vitamin B12 Metabolism and Regulation in Prokaryotes. Journal of Biological Chemistry 278, 41148–41159.
Roughan, P.G. (1985). Cytidine triphosphate-dependent, acyl-CoA-independent synthesis of phosphatidylglycerol by chloroplasts isolated from spinach and pea. Biochimica Et Biophysica Acta (BBA) - Lipids and Lipid Metabolism 835, 527–532.
Sadre, R., Pfaff, C., and Buchkremer, S. (2011). Plastoquinone-9 biosynthesis in cyanobacteria differs from that in plants and involves a novel 4-hydroxybenzoate solanesyltransferase. Biochemical Journal.
Schledz, M., Seidler, A., Beyer, P., and Neuhaus, G. (2001). A novel phytyltransferase from Synechocystis sp. PCC 6803 involved in tocopherol biosynthesis. FEBS Lett. 499, 15–20.
Schneider, C., Böger, P., and Sandmann, G. (1997). Phytoene Desaturase: Heterologous Expression in an Active State, Purification, and Biochemical Properties. Protein Expression and Purification 10, 175–179.
Schriek, S., Kahmann, U., Staiger, D., Pistorius, E.K., and Michel, K.-P. (2009). Detection of an L-amino acid dehydrogenase activity in Synechocystis sp. PCC 6803. J. Exp. Bot. 60, 1035–1046.
Schriek, S., Rückert, C., Staiger, D., Pistorius, E.K., and Michel, K.-P. (2007). Bioinformatic evaluation of L-arginine catabolic pathways in 24 cyanobacteria and transcriptional analysis of genes encoding enzymes of L-arginine catabolism in the cyanobac
Shibata, M. (2002). Genes Essential to Sodium-dependent Bicarbonate Transport in Cyanobacteria. FUNCTION AND PHYLOGENETIC ANALYSIS. Journal of Biological Chemistry 277, 18658–18664.
Siewe, R.M., Weil, B., Burkovski, A., Eikmanns, B.J., Eikmanns, M., and Krämer, R. (1996). Functional and Genetic Characterization of the (Methyl)ammonium Uptake Carrier of Corynebacterium Glutamicum. J. Biol. Chem. 271, 5398–5403.
Suzuki, S., Ferjani, A., Suzuki, I., and Murata, N. (2004). The SphS-SphR two component system is the exclusive sensor for the induction of gene expression in response to phosphate limitation in synechocystis. J. Biol. Chem. 279, 13234–13240.
Takaichi, S., and Mochimaru, M. (2007). Carotenoids and carotenogenesis in cyanobacteria: unique ketocarotenoids and carotenoid glycosides. Cell. Mol. Life Sci. 64, 2607–2619.
Taroncher-Oldenburg, G., Nishina, K., and Stephanopoulos, G. (2000). Identification and Analysis of the Polyhydroxyalkanoate-Specific ?-Ketothiolase and Acetoacetyl Coenzyme A Reductase Genes in the Cyanobacterium Synechocystis sp. Strain PCC6803. Appl En
Wade Johnson, T., Naithani, S., Stewart, C., Jr, Zybailov, B., Daniel Jones, A., Golbeck, J.H., and Chitnis, P.R. (2003). The menD and menE homologs code for 2-succinyl-6-hydroxyl-2,4-cyclohexadiene-1-carboxylate synthase and O-succinylbenzoic acid-CoA sy
Wu, B., Zhang, B., Feng, X., Rubens, J.R., Huang, R., Hicks, L.M., Pakrasi, H.B., and Tang, Y.J. (2010). Alternative isoleucine synthesis pathway in cyanobacterial species. Microbiology 156, 596–602.
Zhang, S., and Bryant, D.A. (2011). The Tricarboxylic Acid Cycle in Cyanobacteria. Science 334, 1551 –1553.
